# Supplementary material
Source: PubMed Central journal article supplement (PMC2891058)
Supplement: NIHMS195528-supplement-1_si_001.pdf [file NIHMS195528-supplement-1_si_001.pdf]

Figure S1. Multiple sequence alignment of QAPRTase residues from 230 organisms. Residue numbering at top is from the mature *S. typhimurium* protein sequence. Alignment was obtained as described in *Materials and Methods*. Fully conserved residues are denoted with an asterisk: (1) *Salmonella typhimurium* LT2, (2) *Escherichia coli* K-12, (3) *Mycobacterium tuberculosis* H37Rv, (4) *Mycobacterium leprae*, (5) *Mycobacterium avium paratuberculosis*, (6) *Mycobacterium* sp. MCS, (7) *Mycobacterium smegmatis*, (8) *Mycobacterium vanbaalenii*, (9) *Homo sapiens*, (10) *Yersinia pestis*, (11) *Mus musculus*, (12) *Canis familiaris*, (13) *Xenopus laevis*, (14) *Arabidopsis thaliana*, (15) *Oryza sativa japonica*, (16) *Cyanidioschyzon merolae*, (17) *Saccharomyces cerevisiae*, (18) *Ashbya gossypii*, (19) *Candida albicans*, (20) *Cryptococcus neoformans*, (21) *Dictyostelium discoideum*, (22) *Shigella flexneri*, (23) *Erwinia carotovora*, (24) *Photobacterium luminescens*, (25) *Wigglesworthia glossinidia*, (26) *Sodalis glossinidius*, (27) *Xylella fastidiosa*, (28) *Xanthomonas campestris* pv. *Campestris*, (29) *Xanthomonas oryzae*, (30) *Vibrio cholerae*, (31) *Vibrio vulnificus* CMCP6, (32) *Pseudomonas aeruginosa*, (33) *Pseudomonas putida*, (34) *Pseudomonas syringae* pv. *Tomato*, (35) *Psychrobacter arcticum*, (36) *Acinetobacter* sp. ADP1, (37) *Shewanella denitrificans*, (38) *Shewanella frigidimarina*, (39) *Shewanella amazonensis*, (40) *Shewanella baltica*, (41) *Shewanella loihica*, (42) *Idiomarina loihiensis*, (43) *Colwellia psychrerythraea*, (44) *Pseudoalteromonas haloplanktis*, (45) *Pseudoalteromonas atlantica*, (46) *Saccharophagus degradans*, (47) *Psychromonas ingrahamii*, (48) *Marinobacter aquaeolei*, (49) *Coxiella burnetii*, (50) *Legionella pneumophila*, (51) *Methylococcus capsulatus*, (52) *Francisella tularensis*, (53) *Nitrosococcus oceani*, (54) *Alkalilimnicola ehrlichei*, (55) *Halorhodospira halophila*, (56) *Hahella chejuensis*, (57) *Chromohalobacter salexigenus*, (58) *Alcanivorax borkumensis*, (59) *Aeromonas hydrophila*, (60) *Baumannia cicadellinicola*, (61) *Neisseria meningitidis*, (62) *Chromobacterium violaceum*, (63) *Ralstonia solanacearum*, (64) *Ralstonia eutropha* JMP134 : Reut\_A2736, (65) *Ralstonia eutropha* JMP134 : Reut\_B3748, (66) *Burkholderia mallei*, (67) *Burkholderia xenovorans*, (68) *Burkholderia* sp. 383, (69) *Bordetella pertussis*, (70) *Rhodospirillum rubrum*, (71) *Polaromonas* sp. JS666, (72) *Polaromonas naphthalenivorans*: Pnap\_0937 (73) *Polaromonas naphthalenivorans*: Pnap\_4632, (74) *Acidovorax avenae*, (75) *Acidovorax* sp. JS42, (76) *Methylobium petroleiphilum*, (77) *Nitrosomonas europaea*, (78) *Nitrospira multififormis*, (79) *Azoarcus* sp. BH72, (80) *Dechloromonas aromatica*, (81) *Thiobacillus denitrificans*, (82) *Methylobacillus flagellatus*, (83) *Helicobacter pylori*, (84) *Helicobacter hepaticus*, (85) *Wolinella succinogenes*, (86) *Thiomicrospira denitrificans*, (87) *Thiomicrospira crunogena*, (88) *Campylobacter fetus*, (89) *Geobacter sulfurreducens*, (90) *Geobacter metallireducens*, (91) *Pelobacter carbinolicus*, (92) *Pelobacter propionicus*, (93) *Desulfovibrio vulgaris*, (94) *Desulfovibrio desulfuricans*, (95) *Bdellovibrio bacteriovorus*, (96) *Desulfotalea psychrophila*, (97) *Anaeromyxobacter dehalogenans*, (98) *Myxococcus xanthus*, (99) *Syntrophus aciditrophicus*, (100) *Syntrophobacter fumaroxidans*, (101) *Anaplasma marginale*, (102) *Anaplasma phagocytophilum*, (103) *Ehrlichia ruminantium* Welgevonden, (104) *Ehrlichia canis*, (105) *Neorickettsia sennetsu*, (106) *Candidatus Pelagibacter ubique*, (107) *Candidatus Ruthia magnifica*, (108) *Mesorhizobium loti*: mll5833, (109) *Mesorhizobium loti*: mll6272, (110) *Mesorhizobium loti*: mll9102, (111) *Mesorhizobium* sp. BNC1, (112) *Sinorhizobium meliloti*, (113) *Agrobacterium tumefaciens*, (114) *Rhizobium etli*, (115) *Bradyrhizobium japonicum*, (116) *Rhodopseudomonas palustris* CGA009, (117) *Rhodopseudomonas palustris* BisB18, (118) *Rhodopseudomonas palustris* BisB5, (119) *Rhodopseudomonas palustris* BisA53, (120) *Rhodopseudomonas palustris* BisA53, (121) *Nitrobacter hamburgensis*, (122) *Silicibacter pomeroyi*, (123) *Silicibacter* sp. TM1040, (124) *Rhodobacter sphaeroides* ATCC 17029, (125) *Roseobacter denitrificans* (126) *Paracoccus denitrificans*, (127) *Maricaulis maris*, (128) *Hyphomonas neptunium*, (129) *Zymomonas mobilis*, (130) *Novosphingobium aromaticivorans*, (131) *Sphingopyxis alaskensis*, (132) *Erythrobacter litoralis*, (133) *Granulobacter bethesdensis*, (134) *Rhodospirillum rubrum*, (135) *Magnetospirillum magneticum*: amb2953, (136) *Magnetospirillum magneticum*: amb3885, (137) *Magnetococcus* sp. MC-1, (138) *Acidobacteria bacterium*, (139) *Solibacter usitatus*, (140) *Bacillus subtilis*, (141) *Bacillus halodurans*, (142) *Bacillus anthracis* Ames, (143) *Bacillus licheniformis* ATCC 14580, (144) *Bacillus clausii*, (145) *Geobacillus kaustophilus*, (146) *Listeria monocytogenes*, (147) *Streptococcus pneumoniae*, (148) *Clostridium acetobutylicum*, (149) *Clostridium perfringens* 13, (150)

*Clostridium novyi*, (151) *Clostridium thermocellum*, (152) *Carboxydotherrmus hydrogenoformans*, (153) *Syntrophomonas wolfei*, (154) *Corynebacterium glutamicum*, (155) *Corynebacterium efficiens*, (156) *Corynebacterium diphtheriae*, (157) *Corynebacterium jeikeium*, (158) *Nocardia farcinica*, (159) *Rhodococcus* sp. RHA1, (160) *Streptomyces avermitilis*, (161) *Leifsonia xyli xyli* CTCB07, (162) *Arthrobacter* sp. FB24, (163) *Arthrobacter aurescens*, (164) *Nocardioides* sp. JS614, (165) *Thermobifida fusca*, (166) *Frankia* sp. CcI3, (167) *Frankia alni*, (168) *Acidothermus cellulolyticus*, (169) *Bifidobacterium longum*, (170) *Rubrobacter xylanophilus*, (171) *Fusobacterium nucleatum*, (172) *Rhodopirellula baltica*, (173) *Leptospira interrogans serovar lai*, (174) *Synechocystis* sp. PCC6803, (175) *Synechococcus* sp. WH8102, (176) *Synechococcus elongatus* PCC6301, (177) *Synechococcus* sp. CC9902, (178) *Synechococcus* sp. CC9311, (179) *Cyanobacteria* Yellowstone A-Prime, (180) *Cyanobacteria* Yellowstone B-Prime, (181) *Thermosynechococcus elongates*, (182) *Gloeobacter violaceus*, (183) *Anabaena variabilis*, (184) *Prochlorococcus marinus* SS120, (185) *Prochlorococcus marinus* MED4, (186) *Prochlorococcus marinus* MIT9313, (187) *Prochlorococcus marinus* NATL2A, (188) *Prochlorococcus marinus* MIT9312, (189) *Prochlorococcus marinus* MIT 9515, (190) *Trichodesmium erythraeum*, (191) *Bacteroides fragilis*, (192) *Porphyromonas gingivalis*, (193) *Salinibacter rubber*, (194) *Cytophaga hutchinsonii*, (195) *Gramella forsetii*, (196) *Chlorobium tepidum*, (197) *Chlorobium chlorochromatii*, (198) *Chlorobium phaeobacteroides*: Cpha266\_0455, (199) *Chlorobium phaeobacteroides*: Cpha266\_2293, (200) *Pelodictyon luteolum*, (201) *Dehalococcoides ethenogenes*, (202) *Deinococcus geothermalis*, (203) *Thermus thermophilus* HB27, (204) *Aquifex aeolicus*, (205) *Thermotoga maritime*, (206) *Methanococcus maripaludis*, (207) *Methanosarcina acetivorans*, (208) *Methanosarcina barkeri*: Mbar\_A1304, (209) *Methanosarcina barkeri*: Mbar\_A1867, (210) *Methanosarcina mazei*, (211) *Methanococcoides burtonii*: Mbur\_0259, (212) *Methanococcoides burtonii*: Mbur\_1682, (213) *Methanosaeta thermophila*, (214) *Methanospirillum hungatei*, (215) *Methanoculleus marisnigri*, (216) *Methanosphaera stadtmanae*, (217) *Methanopyrus kandleri*, (218) *Halobacterium* sp. NRC-1, (219) *Haloarcula marismortui*, (220) *Natronomonas pharaonis*, (221) *Pyrococcus horikoshii*, (222) *Pyrococcus abyssi*, (223) *Pyrococcus furiosus*, (224) *Thermococcus kodakaraensis*, (225) *Hyperthermus butylicus*, (226) *Sulfolobus solfataricus*, (227) *Sulfolobus tokodaii*, (228) *Sulfolobus acidocaldarius*, (229) *Pyrobaculum aerophilum*, (230) *Pyrobaculum islandicum*

.....|.....| .....|.....| .....|.....| .....|.....| .....|.....| .....|.....|

```

1 -----PP RRYNPDDRRD
2 -----MPP RRYNPDIRRD
3 -----M
4 -----MI
5 -----
6 -----MLLS
7 -----MLMM
8 -----M
9 -----MDA EGL
10 -----MPP RCYNSNSRRA
11 -----MDPEGL
12 -----MDPKGL
13 -----MGC RDF
14 MISVSRFLSP -----QFYA IPRSFVKMSA S-----AT QTAGEVSMGI
15 MPAAAAAAP PNPVNLQLAP RLRGLVSFPS SYSSSPFSN RLRRLRPRAA SMSAEARVPV
16 -----MNSKEKQLER
17 -----MP--VY
18 -----MP--EF
19 -----MAP--EY
20 -----MS ETDLKPQNL
21 -----MEI
22 -----MPP RRYNPDIRD
23 -----MST RRYSQEQRQK
24 -----MTK QNCNTDQRR
25 -----MINFSKK
26 -----MST RRYNVERRRA
27 -----M
28 -----MTTT
29 -----MSLPVHTD
30 -----MK ETHNSQDRLA
31 -----MK NTHNSQERLD
32 -----MPN
33 -----MPN
34 -----MPN
35 -----MTVKKR
36 -----MDYILDVIMS
37 -----
38 -----
39 -----
40 -----
41 -----
42 -----
43 -----MLS
44 -----
45 -----
46 -----MRPSAK FILVISKPMN
47 -----
48 -----MIS
49 -----
50 -----
51 -----
52 -----MADVMLNTD
53 -----
54 -----MCPTNV
55 -----M
56 -----
57 -----MHY
58 -----MTIAN---
59 -----
60 -----MLP NNQN-NVHRQ
61 -----MPSEN
62 -----M
63 -----MTATQMTTSA AQATFDS---
64 -----MS VNSVFDS---
65 -----
66 -----MTIDA VSPLFADISR
67 -----M GAVERSQVEA VSPLFAEIQ
68 -----MTNSA VSPLFSSVRE
69 -----M SINIGQAAPL AIDAAPTLRT
70 -----MLSAMTSY FD-----
71 -----MKKS FD-----
72 -----MKKS FV-----
73 -----
74 -----MTNL FQPAAVP---
75 -----M QKCGESMRCG YARPMTRDL
76 -----MLTFET---
77 -----
78 -----MFY
79 -----M
80 -----MTIEFDY---
81 -----
82 -----MNPISQQT

```



```

166 -----MSG S-----APGSVC GPGSAGVPGG RLSPATRSAL
167 -----MSE TDGHGWTGDH GWTGDHGWTD GHGWIEVHSG RLSPATRSAL
168 -----MPA P-----V-----RLPADIVQRL
169 -----
170 -----MQORA
171 -----MNLR
172 -----M KPAMDYRPVQ
173 -----MWLSKDKTFF CSQMKRAYTH
174 -----MMRILVTNP APMTICLPPWI
175 -----MSGMDWQSSA
176 -----MFAIVP----MLPPWI
177 -----MDWQAPA
178 -----MARADLSITP
179 -----
180 -----
181 -----MNPRVSA--YLPPWS
182 -----MLTNRYA--LPHPL
183 -----MSKAG--VLPPWL
184 -----MNIITPN
185 -----MDLYSPN
186 -----MFSMSVSSPS
187 -----MDLRSPK
188 -----MDLNTPI
189 -----MDFYSPN
190 -----MKG--VIPPKI
191 -----
192 -----
193 -----MLSL
194 -----M ITEYLFYII HY-----FCLM
195 -----M AVMAEKRTNH
196 -----MNHK
197 -----MNK
198 -----MKMKNQ
199 -----
200 -----
201 -----
202 -----
203 -----MGGV
204 -----MNEI
205 -----
206 -----
207 -----
208 -----
209 -----
210 -----
211 -----
212 -----
213 -----
214 -----
215 -----
216 -----
217 -----
218 -----
219 -----
220 -----
221 -----
222 -----
223 -----
224 -----
225 -----
226 -----
227 -----
228 -----
229 -----
230 -----

```

```

.....|.....| .....|.....| .....|.....| .....|.....| .....|.....|
13      23      33      45      52
1 ALLERINLDI PAAVAQALRE DLG-----GEVDAGNDI TA---QLLPA DTQAHATVIT
2 ELLERINLDI PGAVAQALRE DLG-----GTVDANNDI TA---KLLPE NSRSHATVIT
3 GLSDWELAAA RAAIARGLDE DLRYGP----DV-----TTL--ATVPA SATTASLVT
4 MLSDCEFDAE RDTIRRALHE DLRYGL----DI-----TTQ--ATVPA GTVVIGSMVP
5 MISDCELTAA REIIRRLVE DLRYGP----DV-----TTL--ATVPA EAVATASMVP
6 QLSETEIAEA RAVVARGLEE DLRYGP----DV-----TTQ--ATVPA DAATTASMRT
7 KLSDAELTAA KAAVARAVEE DLAYGP----DV-----TTM--ATVDA AATTTASVVS
8 TLTEDELGEA RAVIARALDE DLRYGP----DV-----TTL--ATVAA DAHTTAAVVS
9 ALLLPPVT-L AALVDSWLRE DCPG-----LNY AALVSG----AGPSQAALWA
10 ELLERIQSDI PATVAQALSE DLG-----GEVNADRDL TA---QLLPA DKQATATIT
11 QLLLPPPT-L AALANSWLQE DCPG-----LNF ASLVTG----SAPSQAVLWA
12 ELLLPPPT-L AALADSWLRE DCPG-----LNH AALVSG----AAPSQAVLWA
13 TLLPRPR-L QQFARDWLAE DAPW-----LDI AGWAASRRNP GGQEEAVLLC
14 KPPSHPTYDL KAVIKLALAE DAGHT-----GDV TCM--ATIPF DMEVEAYFLA

```

|    |             |             |            |            |            |             |
|----|-------------|-------------|------------|------------|------------|-------------|
| 15 | APPAHPTYDL  | KAVINLALSE  | DAGDR----- | -----GDV   | SCL--ATIPS | DVKAEATFIA  |
| 16 | ARVAPLPLLL  | NAHIERWLE   | DAPS-----  | -----FDF   | SGSLVD---- | LRPASGTLWQ  |
| 17 | EHLLEPVNGAW | RQDVTNWLSE  | DVPS-----  | -----FDF   | GGYVVG---- | SDLKEANLYC  |
| 18 | KNLLPANGAW  | KHDITNWLQE  | DVPA-----  | -----FDY   | GGYVVG---- | SATKTATLLC  |
| 19 | ANLLPVSGNW  | KQKITDYLTE  | DVPS-----  | -----FDF   | GGFVVG---- | NTPETGSLYM  |
| 20 | AHLLPPS--W  | SAEVQRWFAE  | DTPS-----  | -----FDW   | AGFVVG---- | EEEQEAILWG  |
| 21 | SQLLPKFK-I  | EKIIKEWLEE  | DIPS-----  | -----FDY   | GGCVVG---- | SDEKVAHLLG  |
| 22 | ELLERINLDI  | PGAVAQALRE  | DLG-----   | -GTVDANNDI | TA---KLLPE | NSRSBATVIT  |
| 23 | TLARIAQDI   | PTSVDLALRE  | DLG-----   | -GIVDANQDI | TA---LLPD  | NEIVSARIIT  |
| 24 | VLMEHLQNDI  | PASVTLALKE  | DLG-----   | -GNTNFTADI | TG---QLIPA | DKQATAVIT   |
| 25 | KIIKQIKKDI  | NNIVKSSLEE  | DLGKSIN--- | -----INFDI | TSK--IFKEN | KLIK-SNIYT  |
| 26 | ELLARIQQDI  | PPSVSAALKE  | DLG-----   | -GGTDAQADI | TA---LLLPV | DSQASAVIIT  |
| 27 | NLISLPRIII  | EPMVRHALAE  | DLGLAG---- | -----DI    | TSA--AVIPE | KHRSTVIVVA  |
| 28 | APVAPADALV  | EADVARALAE  | DIG-----   | -----SGDV  | TA---ALLP- | DAPDTAYLLC  |
| 29 | VPVTPPAESI  | DADVARALAE  | DIG-----   | -----SGDV  | TA---ALLP- | DRADSAYLLC  |
| 30 | YLKQQLPADI  | TRSVITDLKE  | DLG-----   | -GTLDPAAID | TA---SLIPA | DRISTATIIT  |
| 31 | YLKQQLPIEI  | TRAVTDTLKE  | DLG-----   | -GSLNADNDV | TA---ALIPA | EAINATATIIT |
| 32 | LTLADLQGEI  | QANVRTALAE  | DVG-----   | -----GGDL  | TA---QLIDP | QREAEARVIT  |
| 33 | LRLADLTAEI  | EANVRRALLE  | DIG-----   | -----SGDI  | TA---QLIPA | ERLAKATIIT  |
| 34 | LRIADLSAEI  | EANVRRALLE  | DVG-----   | -----SGDI  | TA---QLIPA | ERLAKATIIS  |
| 35 | EP-ALAEVLL  | KPLVESALME  | DLGRRG---- | -----DV    | TSQ--ATIPA | DMQAQLQIKA  |
| 36 | IPQSILLEQSI | QINIQQALQE  | DIG-----   | -----DGD   | TA---MLTPE | DEQATATIIT  |
| 37 | ----MLENDI  | RHSVKTALNE  | DLG--HNEHQ | SVEAMLNADI | TA---MLIPA | EKQVRGTLIT  |
| 38 | ----MLENDI  | RHAVQTALDE  | DLG--HTAHN | TIHDMLNADI | TA---QLIPA | DKHVS GALIT |
| 39 | ----MLENDI  | RLSVKAALDE  | DLG-----   | --HGASADI  | TA---QLIPE | DRIAEATLIT  |
| 40 | ----MLENDI  | RQSVKSALSE  | DLGG-TEIND | QTKAIAYGDI | TA---MLIPA | DKYAEATLIT  |
| 41 | ----MLENDI  | RLAVKVALEE  | DLGFQADSNL | TAEKLSLDI  | TA---QLIPS | DKYAQASLIT  |
| 42 | MSQPELQLAI  | QDGVRAALKE  | DLF-----   | -GEDARL-DI | TA---QLIPE | QSQSRASIIT  |
| 43 | SQLEKLQDDI  | SKTISWALCE  | DLGA----VD | NAMPQASQDI | TA---MLIPE | NEQAVATVIT  |
| 44 | --MPIPHTLV  | QSLVTLALGE  | DL-----    | NYQSAENGDI | TA---QLIPV | NEQANAKVIT  |
| 45 | ----MLQHAI  | QEAVKAAALLE | DLG-----   | -GPDCTMGDI | TA---NLIPE | PQQIVVNIIT  |
| 46 | IQLDSIRADI  | TRAVREALAE  | DIG-----   | -----DGD   | TA---MLIPG | DQINTAEIIT  |
| 47 | ----MVAQEI  | IRSVKIALDE  | DLN-----   | -GLSPLEGDI | SA---NLIPE | GRQAKAIVIT  |
| 48 | AELLR-QARI  | ES-VAQSLRE  | DIG-----   | -----DGD   | TA---QLIPA | EKLATARVIT  |
| 49 | ----MNKKAI  | RTAVHAALVE  | DIG-----   | -----SGDI  | TA---ELISA | ETVARASIIS  |
| 50 | -MNNVLSQVT  | FD-VKRALQE  | DVG-----   | -----NGDV  | TA---ALLPQ | QLIVEAEIIS  |
| 51 | -MSQTPVELN  | LDDIDRYIAE  | DLG-----   | -----SGDL  | TA---DVVPA | SVSARAEEVIT |
| 52 | QINKVPNDIV  | TRLVRESLAE  | DIA-----   | -----TGDI  | TA---QLA-E | DIDTTAFKIT  |
| 53 | ----MSPVSI  | KEEVRRALAE  | DIG-----   | -----TGDI  | TT---TLIPA | TTKITATIIC  |
| 54 | RPQPPAAEQI  | QADVTRALEE  | DLG-----   | -----TGDI  | TA---ELVPR | NAWAQGVIC   |
| 55 | TISLPPRETI  | RDDVARALAE  | DVG-----   | -----GGDL  | TA---GLVPA | SGVAEQVVA   |
| 56 | MLEQLIQPAI  | QDDVEKALAE  | DIG-----   | -----SGDI  | TA---MLIPA | EQHAEARVIT  |
| 57 | R--EALAEDI  | RTSARLLAE   | DVG-----   | -----PGDI  | TA---QLIPA | KQWAWARVVS  |
| 58 | -LPDYVRDDI  | TRNVTFALAE  | DIR-----   | -----DGD   | TA---QLIDA | DSTSSATIIT  |
| 59 | ----MLQQDI  | RRAVRAALLE  | DLG--DALTP | LDQPDASADI | TA---QLIPA | DRLASARVIT  |
| 60 | YLLTRIKEDI  | SYIVNFALKE  | DLG-----   | -GLINADIDI | TA---QLIPK | ISKSNATIIT  |
| 61 | TLFPLPDTLL  | RPMVEQALSE  | DLGRRG---- | -----DI    | TSA--AVIAP | DKTAKLFLVS  |
| 62 | PLPAPH--LI  | AQQVALALAE  | DIG-----   | -----PCDR  | TA---QLIAA | DKAGSARVIA  |
| 63 | -FGSALREAL  | AANVAAAIRE  | DVG-----   | -----TGDR  | TG---LLIPA | DRHARARVIV  |
| 64 | -YGPALKSAL  | EANVSAAIAE  | DVG-----   | -----SGDL  | TG---LLVPA | DKQAHARVIV  |
| 65 | --MYDIFST   | DKLIDLWLTE  | DIGICD---- | -----L     | TVQ--TMIEP | GETGTFCMNA  |
| 66 | EYGAAFDAAI  | ARNVADALAE  | DVG-----   | -----SGDQ  | TG---RLVPD | GAPRRARVIV  |
| 67 | QYGAAFEAAI  | ARNVADALAE  | DVG-----   | -----TGDI  | TG---RLVPA | DDVRGARIIV  |
| 68 | QYGAAFDDAI  | ARNVADAI AE | DVG-----   | -----AGDQ  | TG---RLVPA | GGRRRARIIV  |
| 69 | APAPLPQVML  | EPLVRAALLE  | DLGRAG---- | -----DI    | TTD--AIVPA | QARAQTRLVA  |
| 70 | FSDLVAELA   | RVDARALEE   | DVG-----   | -----SGDL  | TA---GLIDP | ACHARAHVLA  |
| 71 | FSAEATIVEVA | KADAILALAE  | DVG-----   | -----AGDL  | TA---GLIDP | ARSARAQVLA  |
| 72 | FNVDGVAALA  | RADVARALAE  | DLG-----   | -----AGDL  | TA---ALIDP | AAQAHAHVLA  |
| 73 | MKNEKFNQTV  | HADVARALQE  | DVG-----   | -----TGDL  | TA---ALVPQ | EAFARATIIC  |
| 74 | AGDAQWQATV  | QADVRALEE   | DVG-----   | -----AGDL  | TA---ALIDP | ARRARARVLA  |
| 75 | FGADALAALA  | RADVDRALQE  | DVG-----   | -----SGDL  | TA---GLIDP | ARRVRARILA  |
| 76 | --NETLDEAR  | ARNVRDALFE  | DIG-----   | -----RTDW  | TG---RLVPE | GHRVRARVLV  |
| 77 | --MLQSEAI   | SNQVRLALSE  | DIG-----   | -----TGDL  | TA---SLIPP | GKCLSAQVIV  |
| 78 | DHFTYLETEV  | KNNVSQALLE  | DVG-----   | -----AGDL  | TA---SLVPC | DETATATVIS  |
| 79 | TISEQLRVEI  | QRNVSASLAE  | DIG-----   | -----TGDL  | TA---RLIAA | ETEARGRVIT  |
| 80 | ----PLAAEI  | SRNVDAALSE  | DVG-----   | -----AGDL  | TA---TLVPA | ERQVRATVIS  |
| 81 | -MSELLASAV  | ETDVARALAE  | DVG-----   | -----SGDL  | TA---RLIPA | AQTGTARLIT  |
| 82 | PPFNALQKVI  | EANILHALEE  | DVG-----   | -----AGDI  | TA---QLVPA | QLATATI IA  |
| 83 | IRT-----    | --FLERALKE  | DLG-----   | -----HGD-  | LFER--VLEK | DFKATAFVRA  |
| 84 | IKD-----    | --FIKKALDE  | DLG-----   | -----RGD-  | LYA---LFAT | DKEVQAYIIA  |
| 85 | LRP-----    | --FLEAALAE  | DIG-----   | -----RGD-  | LFA---LMDI | KMRVQAEIIA  |
| 86 | IED-----    | --FVKETLAQ  | DVG-----   | -----RGD-  | LYA---LVEP | SVEASAKIVA  |
| 87 | MTKINYFKDL  | ENNIKNALAE  | DVG-----   | -----PGDL  | TA---GLIPD | TRQATAQVIA  |
| 88 | ----MNTYI   | NELINLGFKE  | DLSSG----  | -----DI    | TSL--AIFND | EKDS-FYLIC  |
| 89 | ----MTGL    | DPIIDNALQE  | DIHTGD---- | -----I     | TTL--SVVPE | PRPARARLIA  |
| 90 | ----MTGI    | DKIIEALME   | DIHTGD---- | -----I     | TTL--AVVPG | SRPARARLIA  |
| 91 | ----MFEI    | DRIIRTALQE  | DIGLGD---- | -----I     | TTQ--ATIAT | GTTARAEVLA  |
| 92 | ----MLTL    | DRFIDAALAE  | DIHTGD---- | -----I     | TTR--ALLPK | KRPATARLVA  |
| 93 | FFSGTALDRL  | TAAIDLALVE  | DGPD-----  | -----L     | TSD--AVFSP | EDRLEAVVVA  |
| 94 | FFAGEALRHT  | VAAIDLALVE  | DGPD-----  | -----L     | TSN--AVFAP | SHQLAAQIIA  |
| 95 | ---MT---L   | LELIRAAIKE  | DMPH-----  | -----GDV   | TTE--SLALK | PRMGRARLKA  |
| 96 | ---MDKNTL   | RSTLLNFLAE  | DIGRGD---- | -----I     | TSE--SIFPA | KQQGKAHLVA  |
| 97 | --MPRLSAHA  | ERLLDLALAE  | DLLL-----  | -----GDA   | TSE--ATIDA | SATGEGRFLA  |

|     |             |             |             |            |            |            |             |            |
|-----|-------------|-------------|-------------|------------|------------|------------|-------------|------------|
| 98  | ---         | MQQDYL      | DRLIALALDE  | DLGAA----  | -----      | GDV        | TSQ--ALIPP  | DYEGSAELVA |
| 99  | LPKHMLD---  | ALILSALEE   | DVGS-----   | -----      | GDV        | TTA--AVLSG | EENGYARVVA  |            |
| 100 | -----       | MDQL        | DVLLRMALVE  | DVGH-----  | -----      | GDV        | TTE--GTIDA  | GLTGRAVVFV |
| 101 | -----       | MF          | EIIIRSAIME  | DLGEQG---- | -----      | DI         | TTN--CIFEK  | EEVN-FSIIS |
| 102 | -----       | MF          | EYIIRQALEE  | DLGTIG---- | -----      | DI         | TTD--CIIGD  | QRIK-FEVNA |
| 103 | -----       | MNGLF       | SEIHNALKE   | DLKIG----- | -----      | DI         | TTN--NTLTN  | EQVD-FTISA |
| 104 | -----       | MKVSF       | SEIINNALKE  | DLGENG---- | -----      | DI         | TTN--SILLD  | EKIN-FSINA |
| 105 | TVISM DYEA  | EKIITLALNE  | DLGLGC----  | -----      | DI         | TTE--NTLPC | DLVTSFVDNA  |            |
| 106 | PKIKLSNYYI  | KNKVKLALNE  | DLYPNG----  | -----      | DI         | TSS--LVKNS | KVIK-IKLIS  |            |
| 107 | MNLSTSKYI   | LDSVALALAE  | DFG-----    | -----      | TGDV       | SA---DLFLN | KTIISAEIIS  |            |
| 108 | SLAPLPQIIM  | EPIVRSALLE  | DLGRAG----  | -----      | DI         | TSD--AIIPA | DCKATLALNA  |            |
| 109 | NLSPLPVIML  | EPLVRAALLE  | DLGRAG----  | -----      | DV         | TTE--AIVTP | FHYARTVLAA  |            |
| 110 | NLAPLPAIML  | EPLVRAALLE  | DLGRAG----  | -----      | DL         | TTD--AIVPK | DLRATVLSA   |            |
| 111 | NIPPLPTVMF  | EPLVRSTLLE  | DLGRAG----  | -----      | DL         | TTD--AVVPA | GLHAELTLTA  |            |
| 112 | LRPELPALMV  | EEQVKAALLE  | DLGRAG----  | -----      | DI         | TTL--STIGP | DRTAANMSV   |            |
| 113 | ILSPLPRLII  | EPPVRNALLE  | DLGLAG----  | -----      | DI         | TST--AVIPA | DHRSVVVMAA  |            |
| 114 | SLAPLPRLLI  | EPLVRAALLE  | DLGLAG----  | -----      | DI         | TSA--SVIPS | DHRSTVVMMA  |            |
| 115 | PDAFLSPLAI  | DESVHRALDE  | DLGRAG----  | -----      | DI         | TSL--ATIPE | ATKAKAILVA  |            |
| 116 | PDAFLSPLAI  | TDAVRRALDE  | DLGRAG----  | -----      | DV         | TSV--ATIPE | ATQAHAILVA  |            |
| 117 | TDFAFLSPFAI | AEAVRRALAE  | DLGRAG----  | -----      | DI         | TSN--ATIPA | EAHAQATMVA  |            |
| 118 | LKDVRMPAAT  | TTELERLLDD  | DVP-----    | -----      | HGDL       | TTE--ALGIG | GQAGVMEFTA  |            |
| 119 | MSSFATTCAS  | RTELESLLLD  | DAP-----    | -----      | HGDL       | TTE--ALGIG | SQPATMQFVA  |            |
| 120 | PDAFLSPFAI  | DEAVRRALDE  | DLGRAG----  | -----      | DV         | TSI--ATIPA | EAQAHAVLVA  |            |
| 121 | PLPALPRVMI  | EPLVRMALLE  | DIGRAG----  | -----      | DL         | TTD--AIVPA | GHRATVLLVA  |            |
| 122 | THAPLPDLIL  | EPLVRAALME  | DLGTYG----  | -----      | DI         | TTR--TVIAP | GTRYCARLNA  |            |
| 123 | SFATLPDLIL  | EPLVKSALME  | DLGSYG----  | -----      | DV         | TTR--AVIPD | DVTYSARLRA  |            |
| 124 | -----       | MFLLD       | DRALLALLQE  | DLP-----   | -----      | HGDL       | TSR--ALGIG  | PAPGLLRMAA |
| 125 | -----       | M           | NQLIDLWLDE  | DVNYDD---- | -----      | L          | TAK--IMVDD  | DAVAKFGMNA |
| 126 | EMPPLEPIL   | EPLLRAALTE  | DLGTYG----  | -----      | DI         | TTR--TVIPA | GTRYRARIVA  |            |
| 127 | PIMPLPRHV   | NDAVARAIAE  | DQGGRG----  | -----      | DV         | TSL--ACIPA | KAEAKFYVNA  |            |
| 128 | -IPPLSPIIL  | DPIVRLALAE  | DLGRAG----  | -----      | DL         | TTD--ATIPP | ETQLSVVIAA  |            |
| 129 | SVLDDDGFDA  | EAFIRSTLAE  | DLGEAG----  | -----      | DI         | TAM--AVIPE | EAVFSGVMAS  |            |
| 130 | SSFSIPGFDL  | EAFVAATLAE  | DLGQGLP---- | -----      | GGHDV      | TSE--SVIPA | DARFTGMTDS  |            |
| 131 | TQFPMGFDL   | EAFVRATLAE  | DLGAG-----  | -----      | DI         | TSL--ATIPA | DARFDGVMDS  |            |
| 132 | STFDLPGFDL  | DRFVRDTLAE  | DLGEGLP---- | -----      | GGRDV      | TSE--SVIPA | EARFAGVMDS  |            |
| 133 | -MTPLPDLIL  | EPLVRAALLE  | DLGRAG----  | -----      | DI         | TTD--AVIPA | TQTARVALQA  |            |
| 134 | PVAALSPFAI  | DEAVRRALAE  | DLGRAG----  | -----      | DI         | TST--ATIPA | ATRAHARFVA  |            |
| 135 | -----       | MIRIT       | DEELDRFFHD  | DVP-----   | -----      | HGDL       | TTR--SLGLA  | EAPAAMAFRA |
| 136 | PEAELDWDDA  | RRVILAALAE  | DTGADKG---- | -----      | GEDDI      | TSA--SVIPA | DLRFTGIMAA  |            |
| 137 | -----       | MTPIW       | SDIVRSALAE  | DIG-----   | -----      | RGDI       | TTN--TLIPA  | GKEAEAVLIA |
| 138 | NSRRVTAVLE  | N-----      | ALTE        | DRAT-----  | -----      | RDA        | TTY--ACIDP  | NQRATGLTIA |
| 139 | -----       | M           | NPIVRLALEE  | DIGT-----  | -----      | GDV        | TSR--ACISE  | SQMAAGRFLA |
| 140 | Q-----      | L           | KKLLNHFFLE  | DIG-----   | -----      | TGDL       | TSQS--IFGE  | -QSCAEIVA  |
| 141 | A-----      | V           | KRALDRFFLE  | DGF-----   | -----      | NGDI       | TTA--IFPP   | SEKCVAVHKA |
| 142 | K-----      | V           | KEALNRFFLE  | DIG-----   | -----      | ERDV       | TSQL--IFPD  | NLLSKGTFLA |
| 143 | I-----      | L           | RNMLKEFFKE  | DIG-----   | -----      | RGDL       | TSEA--VFDD  | NHQCEAVITA |
| 144 | K-----      | L           | DQQLRGFLAE  | DIG-----   | -----      | YGDR       | TAEA--LFTV  | -ERAEAVIVA |
| 145 | K-----      | L           | EQLLRQFFLE  | DIG-----   | -----      | DGDV       | TSET--IFPA  | HERASGMFMA |
| 146 | L-----      | M           | NQAIQAFLE   | DIG-----   | -----      | QYDL       | SAGT--VFPR  | DTMGEVFLA  |
| 147 | STDLTFFQ-I  | DDTLKAALRE  | DVH-----    | -----      | SEDY       | STNA--IFDH | HGQAKVSLFA  |            |
| 148 | T-----      | F           | DDFKKELID   | DGA-----   | -----      | YNDI       | TTNA--IIEE  | SSKSTADIIA |
| 149 | L-----      | V           | EENVKRALNE  | DLQ-----   | -----      | YGDI       | TTES--VVLD  | HKIAKVDIIA |
| 150 | I-----      | I           | DKFLIEALKE  | DNF-----   | -----      | YEDI       | TTEA--IVGK  | SSIASVDLIA |
| 151 | S-----      | DI          | DRIIINALRE  | DIP-----   | -----      | SGDI       | TTDN--IIDE  | TSQSEAVLIS |
| 152 | Y-----      | V           | REHIRLALAE  | DIG-----   | -----      | MGDI       | TTEA--IAVG  | DEHTVGFVKV |
| 153 | M-----      | V           | KEIKRALAE   | DLG-----   | -----      | NGDI       | TTRN--LIAE  | TQEQQLFLA  |
| 154 | ---MTH--    | I           | DRIVGAALSE  | DAP-WG---- | -----      | DI         | TSD--TFIPG  | SAQLSAKVVA |
| 155 | ---MLDQRIT  | DRIVAAALDE  | DAP-WG----  | -----      | DL         | TSE--TLVPE | SAIVRAHLVA  |            |
| 156 | -----       | MDVINNALNE  | DLCYGP----  | -----      | DV         | TTE--AIFGL | EK-AEVQFAA  |            |
| 157 | TDPTRIRAAY  | LRMAKVALEE  | DFGDGA----  | -----      | DV         | STL--ATVPA | DATGTKVMRA  |            |
| 158 | LDAALDRDEV  | LALIRTALDE  | DLRYGP----  | -----      | DV         | TTE--ATVPA | DAVVKASVVS  |            |
| 159 | LPDGLDADKV  | RALVRLALDE  | DLRYGP----  | -----      | DV         | TSS--STVPA | DAVAKASVVS  |            |
| 160 | ADAGLDPLEV  | EDIANVAIQE  | DLD-----    | -----      | HGVDV      | TTV--ATISE | DAVATADFTA  |            |
| 161 | ---MLTRPII  | DAAVSAAALAE | DAP-WG----  | -----      | DL         | TSE--LLIPT | SAYASARLAA  |            |
| 162 | LTGSLPETAV  | QEVLRRAALAE | DAP-YG----  | -----      | DI         | TSQ--VLIPA | EARATAVLNA  |            |
| 163 | LT--LPAAPV  | REILERAFAE  | DAP-SG----  | -----      | DI         | TSQ--LLIPA | EARATAVLNA  |            |
| 164 | RAAGLDPEAI  | RAQVARALAE  | DLPGGLA---- | -----      | RGDV       | TSV--ATIAA | DARGTGVFVA  |            |
| 165 | -----       | EELIRTALAE  | DCSG-----   | -----      | HQVDV      | TTV--ATIPP | AQIRTADVVA  |            |
| 166 | ASAGLDPDGV  | VALVGRALVE  | DLPVWEENE-  | VTGQIGAVDA | TSE--ATVDP | ALVGHGAIVS |             |            |
| 167 | VAAGLDPEGV  | VTVIGRAVAE  | DLPSGEPDG-  | PGGRAGAVDA | TSA--ATVDA | ALVGHGALVS |             |            |
| 168 | VDAGLDADHV  | HAVIHAALQE  | D-----      | -----      | RGGVDV     | TSV--AVVPA | DQRAVADVVA  |            |
| 169 | ---MLTSHII  | RVAVEAALAE  | DAP-YG----  | -----      | DI         | TCE--TTIPA | DETGSAHLTA  |            |
| 170 | ATLRRPPGAL  | LELARLALRE  | DLGR-----   | -----      | GDV        | TSE--ATVPP | GLRARGRFVA  |            |
| 171 | --KIDKFQ-M  | DDSRMVLKE   | DIT-----    | -----      | SEDI       | STNA--IYKK | DRLAETISLVS |            |
| 172 | LDDALEN-DL  | RQLVRLSIAE  | DLDTAV----  | -----      | DW         | TTV--AMIAF | ERRGACQIVP  |            |
| 173 | PISSVNFQDY  | ELLAKLAWEE  | DCPE-----   | -----      | EDI        | TSVS--LFSI | DQNATANLNS  |            |
| 174 | IIDP-----   | --WLQQWLAE  | DIG-----    | -----      | RGDW       | STQG--LGLQ | -HRGQARVVA  |            |
| 175 | LTR-----    | --ALDRWLEE  | DIG-----    | -----      | RGD        | LTA---SALQ | RKHGYAHWIA  |            |
| 176 | LLDP-----   | --ILSDWSRE  | DLG-----    | -----      | RGDH       | SAQG--LGLQ | GTTGKATWVA  |            |
| 177 | ISR-----    | --ALDRWLDE  | DIG-----    | -----      | RGD        | LTA---IALQ | GQHAAHWLVA  |            |
| 178 | RLR-----    | --QLAEWLQE  | DLG-----    | -----      | RGD        | LTT---PALR | GREGEAHWRA  |            |
| 179 | MTQALYIP--  | EETLCAWLQE  | DLGH-----   | -----      | GDL        | TSE--LTLPP | SVEGEAVILA  |            |
| 180 | -MEEVYLP--  | EETLCAWLWE  | DLGH-----   | -----      | GDL        | TTE--LTLPP | GLEGEAVILA  |            |

|     |            |             |           |           |            |             |
|-----|------------|-------------|-----------|-----------|------------|-------------|
| 181 | VLDP-----  | --LLDQWLQE  | DIG-----  | -----RGDR | TTQALHLQDR | Q--GKAHRL   |
| 182 | LLDP-----  | --LLSSWLAE  | DWG-----  | -----RGDR | TSEA-LFAEE | SPDGHGKILL  |
| 183 | VLDP-----  | --LLRGWLLE  | DVG-----  | -----RGDR | TTNG-LLAAD | VLGSAKWIA   |
| 184 | IHH-----   | --LLDTWLNE  | DLG-----  | -----RGD- | LSQ---SAVE | NYRAHAHWVS  |
| 185 | ISR-----   | --IIDGWIEE  | DIG-----  | -----KGD- | LTA---SAIT | KKIGKAHWIA  |
| 186 | LTLTPELR-- | --SRLESWLAE | DLG-----  | -----RGD- | LTA---PALR | GCHGRACWRA  |
| 187 | LHK-----   | --ILDTWIEE  | DLG-----  | -----DGD- | LTR---FVLN | DRSASAHWVA  |
| 188 | ISK-----   | --IIDNWIDE  | DIG-----  | -----RGD- | LTR---PSIT | EENGNAWVIA  |
| 189 | ISR-----   | --IIDYWIEE  | DIG-----  | -----KGD- | LTS---SAIT | ENIGKAHWLA  |
| 190 | ILDN-----  | --LLKDWLLE  | DIG-----  | -----RGDR | TTSGLLLEDE | VIVGTGHWLI  |
| 191 | -----MNELI | DRLIDLAFAE  | DIGD----- | -----GDH  | TTL--SCIPA | TAMGKSKLLI  |
| 192 | -----MLL   | EKLIDLAIAE  | DIAD----- | -----GDI  | SSN--AIIPQ | SEGAATMVM   |
| 193 | LRLSIAEDVD | PNGEWFEGE   | APSR----- | -----RDV  | TST--AALAA | DTPLDGRIVA  |
| 194 | HYTYLTTDAL | LAFIDLALKE  | DVGD----- | -----GDH  | TSL--ASIPA | GTEGKAQLIL  |
| 195 | ISPEQFEKEI | DLIKNAIRE   | DIGD----- | -----GDH  | SSL--ACIPK | SAIGKAKLLV  |
| 196 | AFREFFETCR | LKAMQLALEE  | DRFQ----- | -----GDI  | TTE--ATVDQ | NQLGLGYIEV  |
| 197 | AMNDFYEGCR | ARAIMLALEE  | DRYT----- | -----GDI  | TTL--ATVPP | EQAGRAVIKA  |
| 198 | ---MLYQLP  | DTDIERFIEE  | DMP-----  | -----YGD  | TTS--LLGIG | NAQGSITFTS  |
| 199 | AQQDFYEGCR | SRAVMLALEE  | DRYI----- | -----GDI  | TTL--STIDD | NRVGRAEVRA  |
| 200 | DCHDFYEGCR | SRAVMLALEE  | DRYT----- | -----GDV  | TTM--ATIDP | QQQGSVVRA   |
| 201 | ---MSQSQI  | EKIIDNACDE  | DFAR----- | -----GDI  | TTE--TLIPS | SLAGRAIIVA  |
| 202 | ---MLSLDD  | R--LRAALAE  | DIGR----- | -----GDA  | TTL--ATIPP | EQTARAEFLL  |
| 203 | VGEALWQGG  | EEALRAWLRE  | DLGQ----- | -----GDL  | TSL--LVVPE | DIEGEAVILA  |
| 204 | LVKE-----  | --KLKEFLE   | DIG-----  | -----TGD  | TTEG---IYR | GEKAKAVIKT  |
| 205 | -----MEKI  | LDLLMSFVKE  | DEGK----- | -----LDL  | ASFPLRN--- | TTAGAHLLLK  |
| 206 | ---MLKNHA  | LRILEESLDY  | DVG-----  | -----FGDL | TTEL--MIPK | NQSEAVFIA   |
| 207 | -----ML    | IREVESFIEE  | DLG-----  | -----YDDV | SCT--IVPDR | --PAEAIIFT  |
| 208 | -----M     | IDLFELYFYE  | DCP-----  | -----YQDE | SAE--LLRLE | G-RGKMRIVS  |
| 209 | -----ML    | IKEVESFIEE  | DLG-----  | -----YDDV | SCT--IVPDK | --PAEAIIFT  |
| 210 | -----MF    | IREIESFIEE  | DLG-----  | -----YDDV | SCT--IVPDR | --PAEAIIFT  |
| 211 | -----M     | IEEFHYLLE   | DCP-----  | -----YGDE | TTE--LLGIE | G-EGSLTIRS  |
| 212 | -----MIL   | TSEIERFIEE  | DLG-----  | -----ANDI | SCT--LVPEK | --EIKAIIVFV |
| 213 | -----ML    | RSHIERFLEE  | DLG-----  | -----EWDD | STS--IVPDL | --NVDAAIIS  |
| 214 | --MNTLPDIP | LTRLLEYVEE  | DCP-----  | -----FGDI | TSE--VVIDP | QICS-AVISA  |
| 215 | ---MRMIP   | IEDLLRFVRE  | DAP-----  | -----WGDV | TSE--TVVP- | DVACRAVIRA  |
| 216 | ---MSIFS   | DNRIIENVYD  | DIG-----  | -----FEDI | TTN--SLVTE | DKWAQAEILC  |
| 217 | --MLLNEVKV | RKIVELALTE  | DVG-----  | -----RADL | TSS--IVEGE | --RAEAEIVA  |
| 218 | ---MPVT    | DADVERWLRE  | DLG-----  | -----HHDV | TN--DVPG-  | --ETTGRIVA  |
| 219 | ---MLT     | DSDIERWLRE  | DVG-----  | -----HHDV | TN--DVPG-  | --TTEGRLVA  |
| 220 | ---MRIE    | QSQVERWLRE  | DLG-----  | -----HHDV | TN--EVPG-  | --QTTGRLVA  |
| 221 | ---MITVIP  | LEYLLRFVYE  | DSP-----  | -----YGDV | TSE--AIPE  | DMNAEAVIIA  |
| 222 | ---MIP     | LNILLKFIEE  | DAP-----  | -----YGDV | TSE--AIPE  | DMEAEAVIIA  |
| 223 | ---MEIP    | ISYLLKFVEE  | DAP-----  | -----YGDI | TSE--AVIPR | EMSAGVIIA   |
| 224 | ---MVP     | LEYLLRFIEE  | DAP-----  | -----FGDV | TSE--AVIPE | DMKARAVIIA  |
| 225 | --MFLDPYTV | AEKLEWVEE   | DAP-----  | -----FGDL | TTG--YTVP- | GLWARAVVVL  |
| 226 | ---MIDWIY  | VKRLLDYLEE  | DVM-----  | -----PEDI | TTK--FLEG- | --IRARGIVRC |
| 227 | ---MIKQIM  | INKLLSLEE   | DTY-----  | -----PEDV | TSK--IVSG- | --IKCKAIIIS |
| 228 | ---MIEKLV  | INRLLQLEE   | DLY-----  | -----PEDI | TSR--VIRG- | --VKVKGIIIS |
| 229 | ---MIEARLF | AFELDELKR   | DLP-----  | -----FIDW | ASA--ALPGK | TIEA--CVVA  |
| 230 | -----M     | RSRLEAWLLE  | DLG-----  | -----SYDL | TTE--VLGIG | GLRGVAQLFA  |

|    |            |            |            |            |            |            |
|----|------------|------------|------------|------------|------------|------------|
|    | .... ....  | .... ....  | .... ....  | .... ....  | .... ....  | .... ....  |
|    | 62         | 71         | 78         | 86         | 87         | 97         |
| 1  | RED-GVFCGK | RWVE---EVF | IQLAG--DDV | R-----     | LTWHVDDGDA | IHANQ----  |
| 2  | REN-GVFCGK | RWVE---EVF | IQLAG--DDV | T-----     | IIWHVDDGDV | INANQ----  |
| 3  | REA-GVVAGL | DVALLTLNEV | LGTINGYRVL | R-----     | ---VEDGAR  | VPPGE----  |
| 4  | REP-GVIAGV | DVALLVLDEV | FGVDGYRVLY | R-----     | ---VEDGAR  | LQSQG----  |
| 5  | RQP-GVIAGV | DVALLVLDEV | LGARGYQVLD | R-----     | ---VEDGAH  | LQPGQ----  |
| 6  | REP-GVAAGV | DVALLVLDEV | IGPDGYRVVD | R-----     | ---VEDGTR  | LEAGA----  |
| 7  | REP-GVIAGV | DVALLVLDEM | IGADRYRVLH | R-----     | ---VDDGAQ  | LDAKQ----  |
| 8  | REP-GVVAGL | DVALLVLDEV | LGADGYRVGH | R-----     | ---VADGTR  | LEAGG----  |
| 9  | KSP-GVLAGQ | PFFDAIFTQL | NCQVSWFLP- | -----      | -----EGSK  | LVPV-----  |
| 10 | RED-GIFCGQ | RWLN---EVF | IQLG---AQI | S-----     | IQWLVTGDGK | LTANQ----  |
| 11 | KSP-GVLAGR | PFFDAIFTQL | NCQVSWFLP- | -----      | -----EGSK  | LVPV-----  |
| 12 | KSP-GVLAGR | PFFDAIFARV | NCQVSWFLP- | -----      | -----EGSK  | LVPV-----  |
| 13 | KSA-GMLAGS | PFQAVCEEA  | GCTVQWDHS- | -----      | -----DGEW  | LEPV-----  |
| 14 | KED-GIVAGV | ALADMIFE-- | -HVPD----- | -----SLK   | VEWMRKGDY  | VHKGL----- |
| 15 | KED-GVVAGI | SLADMIFK-- | -QVDP----- | -----SLK   | VEWFESDGN  | VHKGL----- |
| 16 | KSA-GVVAGR | PFQAVFTEL  | GCSVTWRDEG | TTSTT----- | ---SLEGQY  | WDGAEGSSSA |
| 17 | KQD-GMLCGV | PFAQEVFNQC | ELQVEWLFK- | -----      | -----EGSF  | LEPSKN--DS |
| 18 | KQK-GVLAGV | PFADVFRQC  | NLECQWLFV- | -----      | -----EGDE  | LDPS----AT |
| 19 | KQS-GVICGI | PFVNEVFHQC | NLQHKWIFS- | -----      | -----EGQF  | VSDKEIASAG |
| 20 | KSG-GVLAGV | PFEEVFKQV  | DCAVEWLMP- | -----      | -----EGSV  | VPPD-----  |
| 21 | KQN-GVFSGS | IFFQEIFNQL | GCKVWFK-   | -----      | -----DGES  | FSMTHGPEKN |
| 22 | REN-GVFCGK | RWVE---EVF | IQLAG--DDV | T-----     | IIWHVDDGDV | INANQ----  |
| 23 | REA-GIFCGT | RWLE---EVF | SQLG---NTT | T-----     | IVWHVADGET | ITPNQ----  |
| 24 | RED-GIFCGQ | QWLN---EVF | TQLG---DQI | S-----     | IEWLVKSDSA | ITANQ----  |
| 25 | KEN-GVFCGK | MWLEEVFY-Q | IDNNINIWK  | V-----     | ---SDGE    | LKKDQ----  |
| 26 | REN-GVFCGQ | CWLE---EVF | NQLG---GGV | A-----     | IEWLVADGDD | ILANQ----  |
| 27 | RQS-GVIAGL | DTAELAFKVI | NAELVMMRHV | H-----     | -----DGMK  | VKPGD----  |
| 28 | KQD-AVIAGR | PWFD---ATH | RALDPQVQ-- | -----      | IAWRIQEGDR | VGAGT----  |
| 29 | KQD-AVITGR | PWFD---ATH | RALDPQVR-- | -----      | IDWLVEHQH  | VAAGT----  |



|     |            |             |            |            |             |           |
|-----|------------|-------------|------------|------------|-------------|-----------|
| 30  | REA-GVFCGQ | LWAD---EVF  | KQLG---GQV | S-----     | IEWHVQDGD   | LTPNQ---- |
| 31  | REH-GVFCGQ | AWAD---EVF  | KQLG---GKV | T-----     | IEWHVKDGD   | VEPNQ---- |
| 32  | REH-ATIAGR | AWVD---EVF  | RQVD---PRV | L-----     | VTWQVEDGQ   | VEPNQ---- |
| 33  | REN-CVVAGT | AWVD---AVF  | RQLD---PRV | A-----     | VHWQVADGEQ  | ASANQ---- |
| 34  | RDA-AVIAGT | AWVD---TVF  | RQLD---PRV | A-----     | VHWQVVDGER  | VSPDQ---- |
| 35  | RQA-GVICGM | DLARLSFALI  | DEKIEFVAYI | N-----     | -----DGET   | VEAGA---- |
| 36  | REN-MILAGR | PWVD---ALI  | TRYD---ASV | Q-----     | IEWLKQEGEQ  | VAAGE---- |
| 37  | RED-GVFCGK | AWAE---QVF  | NQLG---GQV | A-----     | LHWHVDDGDL  | VVANQ---- |
| 38  | RED-GVFCGK | AWAE---QVF  | NQLG---SEV | V-----     | LHWHVDDGDL  | IVANQ---- |
| 39  | REE-GIFCGK | AWAE---QVF  | NQLG---GTV | A-----     | LHWHVDDGDW  | VVPNQ---- |
| 40  | REE-GVFCGK | AWAE---QVF  | NQLG---GEV | A-----     | LHWHVDDGDL  | VLPNQ---- |
| 41  | REE-GVFCGK | AWAE---QVF  | NQLG---GEV | A-----     | LHWHVDDGDL  | VLPNQ---- |
| 42  | RED-AVICGC | AWVD---QVF  | RQMG---NQV | E-----     | IEWLVKDGDN  | VKANT---- |
| 43  | RED-CIVCGV | AWVN---EVF  | KQLD---ASL | NRTVE-QATK | ITWVNDGES   | VAANS---- |
| 44  | RED-CIFCGK | DLII---EVF  | KQVD---PSV | -----V     | VNVLVNDGDA  | VKANS---- |
| 45  | RED-CVLAGK | EWVN---ATF  | MQLD---DNI | D-----     | INWHVEDAQH  | VKADT---- |
| 46  | RED-CTLCGQ | AWLE---ETF  | AQLG---GL  | DS-----    | IEWHAQDGDQ  | VTAGS---- |
| 47  | RED-AVFCGQ | AWTE---EIF  | RQLG---NQV | K-----     | ITWVFKEGDF  | VKANS---- |
| 48  | RED-ARLAGS | AWVE---EVF  | RQVD---PSV | R-----     | LQWQFHDGDD  | VPANA---- |
| 49  | REN-AIICGI | PWVD---EVY  | QAVD---SSI | K-----     | IQWKVKDGD   | VSSNQ---- |
| 50  | REP-MLVCGQ | PWVN---EVF  | KQVD---NTV | E-----     | MEWRVSEGDF  | LSTPA---- |
| 51  | RES-MVLCCG | AWFE---AVF  | RRLDPAVR-- | -----      | VIWLAEEGAE  | VSAAD---- |
| 52  | REE-MILCGQ | DFAN---EVI  | NQLD---KNI | Q-----     | ITWLYSDAQK  | VPANA---- |
| 53  | RET-AILCGT | SWFN---EVF  | HQLD---ADI | A-----     | IDWAKADGDL  | VPANQ---- |
| 54  | REQ-AVLCGH | HWFD---EVF  | RQLDDRVE-- | -----      | IHWAAEGEQR  | LTPDQ---- |
| 55  | REA-AVLCGT | AWFD---EVF  | RQLDRGVG-- | -----      | VRWLCSDGEA  | VEPGA---- |
| 56  | RED-AIVCGV | EWVN---AVF  | AKVD---PDC | K-----     | VEWKFKDGDQ  | AHAND---- |
| 57  | RED-AVLCGV | AWVD---ELY  | RRLD---PSV | R-----     | LTWHAADGDA  | LAPDQ---- |
| 58  | RED-TTMCGI | PWAD---EVF  | KQLG---EV  | D-----     | VEWHVVDGDR  | LSAES---- |
| 59  | REA-GVFCGQ | PWVD---EVF  | VQLG---GEV | R-----     | VEWLVDQGEV  | LSPNQ---- |
| 60  | HEQ-GIFCGK | KWFI---EVF  | KQLS---DDI | I-----     | INWKVDDGDY  | IQANQ---- |
| 61  | RED-GVIAGM | DLARIAFQTM  | DPSVRFQAEI | H-----     | -----DGQA   | VRAGQ---- |
| 62  | RED-AVICGQ | AWFD---ECF  | RQVDARCR-- | -----      | VEWLAEEGK   | VAAGR---- |
| 63  | REA-AVLCGA | PWFD---ACM  | PAVDPALR-- | -----      | VTWLQHEGDR  | MAPDS---- |
| 64  | REQ-AVLCGQ | PWFS---ACM  | KAVDERLT-- | -----      | VTWKQEEGAR  | MAPDS---- |
| 65  | REP-MIAGI  | DVAARIFARY  | DPSSIDVRA  | A-----     | -----DGDK   | VEKGA---- |
| 66  | RED-AVLCGV | PWFD---AVV  | RAVDPSIE-- | -----      | VDWRHREGDR  | MSADS---- |
| 67  | RED-AVLCGV | PWFN---AVM  | RQVDPRIE-- | -----      | VQWRYREGDR  | MKADT---- |
| 68  | REE-AVLCGV | PWFE---AVI  | ARIDPEIV-- | -----      | VQWHYREGDR  | MTPDS---- |
| 69  | RQA-GVLAGL | DLARLAFRLV  | DPEIEFHALL | P-----     | -----DGAQ   | LQPGA---- |
| 70  | REA-AVICGA | PWAQ---AAL  | QQVDPAIR-- | -----      | LQWLVLLEGQR | CEIDQ---- |
| 71  | RES-AVICGS | AWVE---ATI  | LQLDPQAR-- | -----      | LTWHVVDGDR  | CAANQ---- |
| 72  | RES-AVLCGT | AWFE---AAL  | RQMDPEAT-- | -----      | LVWHVQEGER  | CAPNQ---- |
| 73  | RQE-AVICGQ | PWVM---EIL  | KQIAPTAK-- | -----      | TAWSVQDQGH  | CEPGQ---- |
| 74  | REE-AVICGA | PWAE---AAL  | RALDPDVR-- | -----      | LTWRVAEQQR  | CTADQ---- |
| 75  | REA-AVICGA | PWVE---AAL  | RALDPGVT-- | -----      | LNWHVAEGAR  | CATDQ---- |
| 76  | REA-AVLCGR | HWFF---DCV  | VALDPQAD-- | -----      | VQWHYAEGAR  | MSDSD---- |
| 77  | REA-IVICGI | PWFD---ESF  | RQLSPSVR-- | -----      | IDWHVSEGGQ  | TSAGQ---- |
| 78  | RKE-AVMCGS | RWFE---ECF  | RQLEPHVE-- | -----      | VRWHTRDGET  | VGAGQ---- |
| 79  | RED-AVVCGT | AWFD---ATF  | AALSPTTS-- | -----      | VLWHVVDGDR  | VEAGQ---- |
| 80  | REA-GVLCGT | AWFA---ECV  | ARLDPTAR-- | -----      | ITWHGADGDR  | IAPNQ---- |
| 81  | REA-AVIAGR | PWFD---ACF  | KALDLACS-- | -----      | IDWQVKEGDG  | VAAGT---- |
| 82  | RED-AVVCGI | PWAN---EAF  | RQVSREIA-- | -----      | AEWLVEGDDH  | VSAGA---- |
| 83  | KQE-GVFSGE | KYALELLEMT  | G-----IEC  | VQTIK----- | -----DKER   | FKPKD---- |
| 84  | KQE-GVFSGE | IYLKAMLEHF  | Q-----LAL  | VSSYS----- | -----DGES   | FAKGA---- |
| 85  | KSE-GIFSGE | LYARELCEMR  | G-----IEA  | LFGIK----- | -----DGEV   | FEPSK---- |
| 86  | KSD-GVMAGV | TYCNVLAKLE  | N-----FRV  | VWNKN----- | -----DSES   | FVKGD---- |
| 87  | KEA-AVICGR | PWFD---KVI  | QQVN---PNI | E-----     | IEWFCKEGQS  | VPVNT---- |
| 88  | KSD-GVLCGI | DIFKKVFK-F  | IDENISVELY | F-----     | -----KGDG   | IKYAD---- |
| 89  | KEP-LVLAGI | G-VAARVFRH  | LDPA-IRFDA | RF-----    | -----PDGAR  | VETGT---- |
| 90  | KEP-LVLAGI | D-VAARVFTF  | LDAS-VCFEA | RH-----    | -----GDGAR  | LAAGD---- |
| 91  | KQD-FVLAGI | D-VACQVFHV  | LDPS-IAFEK | LR-----    | -----EDGVH  | VQRGD---- |
| 92  | KED-FVLAGI | S-VAERVFDR  | LGGSVDFFAA | RA-----    | -----VDGEL  | IASGS---- |
| 93  | KQH-TLVAGL | PIAPIILDRC  | PEVHP----- | -----YT    | LEMPVRDGD   | LAPGD---- |
| 94  | KED-SLVCLG | AYIPYIMDRV  | IACDPQPQGW | D-----DYT  | VDTPTYADGAH | VTAGT---- |
| 95  | KED-IVLSGA | MAFEQSMQ--  | -ALEP----- | -----TCR   | IKWHFEEGDE  | ILKNQ---- |
| 96  | RQP-MVVAGA | DAVAGEVFRV  | QNDS-ILVEN | AI-----    | -----ADGTH  | IEKGD---- |
| 97  | KED-LVLAGT | AVAV---RVF  | ERLG-----  | -----AS    | CTFDRADGAR  | AARGE---- |
| 98  | KEQ-LVLAGL | DAFV---RVF  | KTVDP----- | -----NVE   | VELLRRDQGE  | IKPKM---- |
| 99  | KSE-LVVAGI | DIFR---QVF  | FAVD-----  | -----DRIA  | IAVCQDSDQ   | ARKGQ---- |
| 100 | REP-LVLSGS | DPFR---RTF  | RLVDP----- | -----QVR   | VESLFDSDGEE | VPADV---- |
| 101 | KEP-MMVSGI | VAVKEIFEIF  | SKK-INFIL  | E-----     | -----CDGNN  | IQSGT---- |
| 102 | REE-LIVSGM | LFISDLANVL  | HKEDISFYPM | E-----     | -----VDGTP  | VKSGT---- |
| 103 | RED-LVVCGM | PILEEIFG-M  | NKGSICYETH | R-----     | -----SDGEF  | IGENS---- |
| 104 | RED-LVVCGI | PILEEIFN-T  | KKEYIKYKVH | K-----     | -----NDGNI  | AGKNS---- |
| 105 | RKE-TVVCVE | FLAKVIFG--  | -QSGIEYFLN | K-----     | -----QGDGR  | VLPGE---- |
| 106 | NQQ-AVIAGL | EFVKQTFK-L  | IDNKIKFIK  | K-----     | -----EEGSI  | VKKND---- |
| 107 | REF-SVICGI | EYAQ---STF  | LLLD---DKI | K-----     | LDWKIKDGE   | ISSGQ---- |
| 108 | RQA-GVVAGL | DLVMFAFLV   | DPGISQLRC  | P-----     | -----EGGK   | VSAGQ---- |
| 109 | RQR-GIVAGL | DLAMLAFRLI  | SPDVEILVER | P-----     | -----DGCS   | VVEGE---- |
| 110 | RQT-GVVAGL | DLAIALAFRLI | DERIETTPVC | P-----     | -----DGSE   | VTPGQ---- |
| 111 | RQP-GVVAGL | DVAALAFRLI  | DPAISVKIER | P-----     | -----DGSA   | IAPGD---- |
| 112 | REA-GVVAGL | ELARTAFRLI  | DPSIRFEALA | A-----     | -----DGDR   | VAPGT---- |

|     |             |             |            |             |             |            |
|-----|-------------|-------------|------------|-------------|-------------|------------|
| 113 | REQ-GVIAGL  | DAAELAFQLV  | DPAIRMNRHI | A-----      | -----DGAA   | VAAGD----- |
| 114 | RQP-GVIAGL  | DAADLAFTLV  | DPEIVMRRHI | E-----      | -----DGDA   | VKSGD----- |
| 115 | RQS-GVIAGL  | PLALATLQEL  | SSDIEVRAHV | R-----      | -----DAAR   | MARGQ----- |
| 116 | RQA-GVIAGL  | PLAIETFRQL  | STDVAITAHA | R-----      | -----DGDT   | VAAGI----- |
| 117 | RQA-GTIAGL  | PLAVAAFQAL  | SPDIFIQPHV | H-----      | -----DGDP   | VARGI----- |
| 118 | RDP-MVLALV  | DDAAAILGLC  | GC-EVERMAM | S-----      | -----GSR    | LAPGA----- |
| 119 | RDT-MVVALV  | KDAAAIIELC  | GG-QVELAAC | C-----      | -----GST    | LTPGE----- |
| 120 | RQA-GVIAGL  | PLAVATFKML  | SPDIVIHPHA | H-----      | -----DGAA   | VAAGI----- |
| 121 | RQQ-GIVAGL  | DLARLAFQLI  | DPATEMQVAH | D-----      | -----DGAV   | VEPGD----- |
| 122 | RAA-ATVSGM  | QIAALAFRLV  | DPALRVETLV | A-----      | -----DGQT   | CAAGD----- |
| 123 | REE-AVVSGM  | QVAALAFRLV  | DATLEVKTRV | A-----      | -----DGAV   | CQPGD----- |
| 124 | RDP-MVLAGV  | EEAARIFALL  | GA-RAEIAAP | S-----      | -----GAE    | RAPGA----- |
| 125 | REP-ITLSGL  | KLAEMVFRKM  | DPECTFETSR | K-----      | -----DGER   | VETGE----- |
| 126 | REA-GVASGM  | QLAGIAFRLI  | DPGLAWRPLH | P-----      | -----DGSR   | FQPGD----- |
| 127 | REA-GVVCGF  | QPALAAIWQC  | DPKALVSPQM | D-----      | -----DGDT   | VKPGD----- |
| 128 | RKP-GVIAGL  | DVAAYSASLV  | DPALKLEIEK | P-----      | -----DGSA   | LTPGD----- |
| 129 | REP-MVIAGL  | PLAAAFFKAL  | DPLAEIEILA | K-----      | -----DGTY   | LPAGQ----- |
| 130 | RDA-ITVCGL  | PIAAAFFRAL  | DPQMKIEILV | E-----      | -----EGAR   | VAPGS----- |
| 131 | RDA-ITVAGL  | PIAERFFRAL  | DPAMEIEILA | E-----      | -----EGAE   | VPAGS----- |
| 132 | RNP-IVVAGL  | PVAAAFFRAL  | DPAMAIDILV | E-----      | -----EGAA   | VEPGA----- |
| 133 | RQP-GVIAGL  | DLARLAFHLV  | EPRIHFSIHV | P-----      | -----DGGR   | VMPGD----- |
| 134 | RQP-GILAGL  | GCAFSAFALL  | DDTVFTTPL  | E-----      | -----DGAE   | IAAGQ----- |
| 135 | GAA-MVASST  | EEAARLLTRL  | GC-AVTASVA | S-----      | -----GTR    | ATTGD----- |
| 136 | RHT-MVVAGM  | PVAQEVFRLV  | VPEARFTARV | A-----      | -----DGDT   | VEAGT----- |
| 137 | REE-LVVCGL  | PVVS---EVF  | KQVDSRIG-- | -----       | ILPEASDGAG  | VMAGN----- |
| 138 | KED-CILAGI  | GAVQRIFEVY  | AMLDGA---- | -VVSH-PEVT  | THPEIFDGVV  | LRKGQ----- |
| 139 | REP-LVVIAGL | DLLA---EY   | TQRGG----  | -----VSD    | LQILKRDGDA  | CVDGE----- |
| 140 | KSE-GIFAGA  | AIIEGFSLL   | DEN---VQS  | ILHKK-----  | -----DGDM   | LHKGE----- |
| 141 | KAR-GIVSGL  | SLLEIGYSL   | DDH---IHV  | EERVK-----  | -----DGQE   | VRPGD----- |
| 142 | KDT-GVFTGR  | LVIEEGFNLI  | DER---IKV  | ELHKK-----  | -----DGDL   | VEKGE----- |
| 143 | KDD-GLFAGE  | LVIIEGFRL   | DET---IAV  | HMLKT-----  | -----DGEA   | VRKGE----- |
| 144 | KGE-GIFAGT  | QVVNQLYALL  | DSD---IEV  | ELFVR-----  | -----DGEQ   | VKRGQ----- |
| 145 | KAD-GVVAGV  | GIIAAGYQLL  | DPR---VEV  | TIMKQ-----  | -----DGER   | VQAGE----- |
| 146 | KET-GILCGI  | SIPPKVYELL  | GGN---IQF  | EAYKK-----  | -----DGDW   | VQKGD----- |
| 147 | KEA-GVLAGL  | TVFQRFVTLF  | DAE---VTF  | QNPHQF----- | -----KGDGR  | LTSGD----- |
| 148 | KED-GIIAGI  | GIFKRVFEIF  | KG----AEA  | EFTIS-----  | -----DGSK   | VKKGE----- |
| 149 | KEK-GVIAGT  | EVFKMVFKIL  | GD----VEV  | DFSVN-----  | -----DSEE   | VEKGO----- |
| 150 | KEE-GIIAGL  | NVFERVFTLL  | GN----VEV  | KALVK-----  | -----DGDE   | VSSSQ----- |
| 151 | KDE-GVIAGL  | DVAKKVFLLM  | DDQ---VVF  | EKMVE-----  | -----DGQT   | VKRGD----- |
| 152 | KEP-GVVAGL  | VLEEEIYRVL  | SGN---VRV  | EYMKV-----  | -----DGEE   | VASGO----- |
| 153 | KAS-GIVAGL  | EVSATVFSCL  | EPA---VQF  | TAFIH-----  | -----DGDE   | IKPGD----- |
| 154 | REP-GVFSGO  | ALFDASFRLV  | DPRINASLKV | A-----      | -----DGDS   | FETGD----- |
| 155 | REP-GVFSGT  | CLLEAAFRVL  | DPEIRIELQI | T-----      | -----DGEA   | FEP-K----- |
| 156 | RAH-GVLAGS  | RIAEEVFRTY  | ATQLKMRIDT | EVL-----    | -----IEDGEV | VAPGD----- |
| 157 | RQA-GVISGL  | D-ALAIVAEV  | ADERHVELVP | L-----      | -----VADGDR | VEAGD----- |
| 158 | RQP-GTVAGI  | DVGLLVLDEV  | LGAGEYEITG | R-----      | -----VADGAR | VEPGQ----- |
| 159 | RAH-GTVAGL  | DVGLLVLDEV  | IGAGRYQVLD | R-----      | -----VADGTR | VAPGQ----- |
| 160 | REA-GVVAGL  | RVAAEIVSVV  | CT-DEFEVER | H-----      | -----VDDGDR | VEEQG----- |
| 161 | REP-GTFAGG  | EVFAAAMRLT  | DPGIQVILAV | A-----      | -----DGDA   | FEAGD----- |
| 162 | RVP-GVLSGG  | AVFAAAMKLT  | DPDAVVELLV | A-----      | -----DGER   | FGAGA----- |
| 163 | RVP-GVFSGG  | TVFRDAMKLV  | DPDTEVEILL | A-----      | -----DGEA   | FDAGT----- |
| 164 | REA-GVVAGL  | GVAALVFHEV  | LG-DAVEVTD | R-----      | -----VPDGR  | VAPGD----- |
| 165 | RRD-GVVAGL  | PLAELVFRVL  | CE-GVVEVIR | H-----      | -----ARDGDS | VKRGD----- |
| 166 | RAA-GVVAGL  | PVAAAVFESL  | LG-PAATVTL | T-----      | -----ARDGDP | VPPGT----- |
| 167 | RAA-GTVAGL  | PVAAAVFESL  | LG-RSVTVTL | T-----      | -----AADGDA | VSPGT----- |
| 168 | RAA-GVIAGL  | PIAAATFVVA  | GD-DQVEVEF | L-----      | -----AADGEQ | VPAGA----- |
| 169 | REN-GVMSGI  | DVFAAAFAAQ  | NPAVTVTAAI | K-----      | -----DGER   | FQRGQ----- |
| 170 | RRE-LVVSGL  | GAAA---AVF  | YEAGGG---- | -----EVE    | FVPLAGEGEL  | AGGGA----- |
| 171 | KEE-GILAGL  | DVFKRVFELL  | DNS---VEF  | TEYK-----   | -----KGDGK  | ILNKD----- |
| 172 | RCS-GIAAGI  | ALAPWIVDEF  | DADLEVEVLI | D-----      | -----EGTP   | LVPGE----- |
| 173 | REP-GILCGT  | GVLEVLNTLS  | GNKIRSELFK | K-----      | -----DSES   | FQAGE----- |
| 174 | KEN-GVIAGL  | PMAARIFQLL  | DP----SMEF | QVLG-----   | -----EGQA   | VTAST----- |
| 175 | KQP-GCFCGG  | PLVQQLFQRL  | D---PEVSV  | HLLRD-----  | -----DGAA   | VEVGD----- |
| 176 | KSE-GIAGL   | PIAFRMLQLL  | DP---QVKC  | TAKLA-----  | -----EGFA   | CGSGQ----- |
| 177 | KQS-GRFCGG  | PLVQTLFERL  | D---PACKV  | QLLVA-----  | -----DGEP   | VQSGQ----- |
| 178 | KAN-GVFCGG  | ALLEPLLKEL  | VGSSPPGLEL | HLLVR-----  | -----DGTP   | IEAGQ----- |
| 179 | KEP-GILAGL  | EIAR---RVF  | RLVD-----  | -----PQLA   | FASQVEEGAS  | VVAGQ----- |
| 180 | KET-GILAGL  | EIAK---RVF  | RLAD-----  | -----PQVE   | FIPGVEEGAR  | VAVRQ----- |
| 181 | KSQ-GVIAGL  | PIVERVFQRL  | TT---AVVF  | TYEQA-----  | -----EGAI   | CEEPT----- |
| 182 | KEA-GVVAGL  | PLVERLFAIV  | DP---AVRF  | APMCE-----  | -----EGTA   | AEART----- |
| 183 | KAP-GVIAGL  | PVAARVFQLL  | NE---KVSF  | VTTID-----  | -----EGAF   | CKPGQ----- |
| 184 | KQE-GIFCGG  | EIVKCLFQRL  | D---PSIEI  | TLQKG-----  | -----EGAK   | LMVGE----- |
| 185 | KEE-GIFCGV  | GIIKEILKKI  | D---EKIEY  | NFFIN-----  | -----DGEK   | FLKYQ----- |
| 186 | KAD-GLFCGG  | VFVEPLLHAL  | D---PKARV  | QLLVS-----  | -----EGAS   | VSVGQ----- |
| 187 | KED-GTFCGG  | DLVKLIFRKI  | D---PKVDI  | QLLIE-----  | -----DGQK   | FEKNQ----- |
| 188 | KEG-GIFCGV  | EIIKEIFKKI  | D---LNISS  | KFNIS-----  | -----DGNQ   | FFKDQ----- |
| 189 | KEK-GIFCGV  | EIIKTILNKI  | D---ENIDC  | RFFIK-----  | -----DGET   | FLKDQ----- |
| 190 | KEP-GVIAGL  | PIAARVFELL  | DQ---QVNF  | LPTVA-----  | -----EGEW   | CEKGT----- |
| 191 | KEA-GVLAGI  | EIAKEIFH--  | -RFDP----- | -----TMK    | VEVFINDEGAS | VKPGD----- |
| 192 | KAD-GIISGM  | EVARRVFE--  | -RFE-----  | -----AVT    | WTPYVSDGGS  | VKRGQ----- |
| 193 | KED-GVIAGL  | PLAD---ALC  | RLVD-----  | -----PALQ   | FVPSVDEGER  | VEAGQ----- |
| 194 | KDT-GILAGI  | ELAEMIFK--  | -RVDP----- | -----ALE    | LDIKMHDDGT  | FKPGQ----- |
| 195 | KDQ-GVLAGI  | EFAKKVFFQ-- | -YVDP----- | -----DLK    | INLKMKGDDL  | IRKGD----- |

```

196 KSE-GIAGV EVAR---QVF QSLD----- -----AALE FTAYVKDGKR VYPGE-----
197 KEQ-GIVAGV DVAL---QVF KACD----- -----PALQ VQCHAEDGAV VQRGD-----
198 RHL-TVLSCT EEACRVLERC GA-RVTSSMP S-----GTS VEAGV-----
199 KED-GILAGA EVAR---QVF AACD----- -----GAVS VVCHHSDGDQ LMVGD-----
200 KED-GVIAGV DVAA---QVF AACN----- -----PSLK LEVHRNDGER VVQGE-----
201 QOD-GIMAGA EVAKIVFM-- -KHPD----- -----NME IDILIEDGKK IKAGD-----
202 KEP-GILSGL AVVR---RVF ALLDP----- -----DLQ VTWTAREGEW RERG-----
203 KEG-GVLAGL WVAE---RVF ALAD----- -----PRTA FAPLVAEGAR VAEGT-----
204 KEE-GVLAGA PFVEMVFEIL G-----GVSV EFKKR----- -----EGEV FEKGE-----
205 TEN-VVASGI EVSRMFLEKM GLLSKFNVE- -----DGEY LEGTG-----
206 KEK-AIICGI DVFIEFMEKN GLTCTSLVN- -----EGDN VIG-----
207 KED-CTVAGI SEAASIFIYF GIQAET----- -----DFKGDGR LSKGD-----
208 REN-GVCACA SDLAEYYERK NM-KTLNYLR D-----GET FKPGD-----
209 KED-CTVAGI KEAESIFCYL GIQVET----- -----TLKGDGC LKEGE-----
210 KED-CTVAGI DEAVSIFYF GIQAET----- -----DFKGDGQ LKKGD-----
211 RDP-GIASCA DDLAEFYEKK GL-KVNMHLE N-----GKE FTENA-----
212 QOD-CIIAGI PIAKRIFDYF GLDSSA----- -----KYKGDGQ LGSGD-----
213 KED-CILAGL EEVSELFEYL DVNSEP----- -----LFDDGEY ATAGA-----
214 RES-LVLAGL TEVIRLSEWY GLAASS----- -----ACSDGLY RQAGD-----
215 KDA-GVIAGL EEARALFEHY GVAVRQ----- -----RIPDGRP VAPGA-----
216 KDE-GILAGM DVAHYIINEF NLNISS----- -----SFLDGE IHKGD-----
217 KEE-GVVSgt LPARLTFELL DCEVDV----- -----LVEDGER IQPGD-----
218 QQA-GVAAGL DA AVR VF EYL GCEADA----- -----PAAAGDR IDAGD-----
219 KAS-GVVAGL DAATAVF EYL DCAVET----- -----SVDSGSA IDAGD-----
220 TEP-GVLAGL EAAA AVFEYL GVDIES----- -----RRSAGDA VEAGE-----
221 QOD-GVIAGV EEARVLF EHF GVKVNV----- -----LKKDGEY VKKGE-----
222 QOD-GVIAGV EEAKVLF EHF GVSVS----- -----KKRDGEE VRAGE-----
223 QOE-GIAGV DEARKLFEYF GVEVNV----- -----KKQDGEF VKKGD-----
224 KQN-GVIAGV EEAKALFEHF GVKVEV----- -----KKRDGEL VGKRD-----
225 KSR-AVPA CL EPVVEALRIL GFNAKP----- -----LVEEAAW VEP PR-----
226 KDS-GILAGN RFIVPF LKYL GFSNIN----- -----GEKDGRE VKKGD-----
227 KDE-GILAGQ KFIIPFLEYL GIKIEN----- -----YMKDGTQ IKKKD-----
228 KENKSILAGN KFIIPFLEYL GLKVDY----- -----YRKDGEL FSKGE-----
229 KAE-GVAAGV DEAAEFLKLL GFQITL----- -----RLPEGAE IKPGV-----
230 REE-AVVAGS EEAAEVYRLA GCGEVEVVKR S-----GQL ARRGD-----

```

```

....|....| ....|....| ....|....| ....|....| ....|....| ....|....|
109 119 129 139
1 ---TVFELNG PARVLLTGER TALNFVQTLS GVASEVRRYV GLLA-----
2 ---SLFELEG PSRVLLTGER TALNFVQTLS GVASKVRHYV ELLE-----
3 ---ALMTLEA QTRGLLTAER TMLNLVGHLS GIATATAAWV DAVRG-----
4 ---PLLTVQA AARGLLTAER TMLNLVCHMS GIATVTVAWV DAVRG-----
5 ---SLLTVRA ETRGLLTAER TMLNLICHL S GIATTTAHWV AAVQG-----
6 ---ALLTLDA PTRGLLTAER TMLNLVSHLS GIATSTAMWV DAVAG-----
7 ---TVLTVEA PTRELLTAER TMLNLLCHLS GVATATAAWV DAVAG-----
8 ---VALTVEG PTRGLLTAER TLLNLVCHLS GIATATAAWV DAVSG-----
9 ---ARVAEVRG PAHCLLLGER VALNTLARCS GIASAAAAAV EAARGAG---
10 ---TLCHLTG PARILLTGER TALNFLQTLS GVATEVSRYV VQLA-----
11 ---VKVAEVKG PAHLLLLGER VALNTLARCS GIASAAATAV EVARSTG---
12 ---AKVAEVRG PAHCLLLGER VALNTLARCS GVASAAAAAV EAAKGTG---
13 ---TRVATVKG RVNDLLLAER PALNALSRSIS GVATVAREAA QKAKAVG---
14 ---KFGKVS G NAHKIVVAER VLLNFMQRMS GIATLTKLMA D--AA-----
15 ---QFGRVYG CARNIIVAER VVLFNFMQRMS GIATMTKAMA D--AA-----
16 GKRPLATVRG PARLLQGER TALNLLSRCS GVATRARQFK QLCRVRQ---
17 GKIVVAKITG PAKNILLAER TALNILSRSS GIATASHKII SLARSTG---
18 GKIPVAKVTG EARNILLAER TALNILSRCS GIASASRNII ASARAAG---
19 GKIVVCTVKG SASNILLAER TALNLLSRAS GVATQSYKTK KLADESG---
20 TKTKVAIVRG KARQLLLGER VALNTLARCS GIATVSRFR DLARAEG---
21 KPQVLAVHIG PVRNIIIGER LSLNILSRSC GITTQGYNVK KLVGDGNEQ-
22 ---PLFELEG PSRVLLTGER TALNFVQTLS GVASKVRHYV ELLE-----
23 ---TLCDITG PAKQLLTGER TALNFLQTLS GVATETSRYV AVLQ-----
24 ---KLCLLRG PAQILLTGER TALNFIQTLS GVATEVSHYV HCLT-----
25 ---LICIIQG PIKCLLAGER TALNFIQTLS GVSSKVKKYI EIKN-----
26 ---PLCRLSG PARLLLTGER TTLNFVQTL C GVASEVKRYV AALA-----
27 ---VIATITG CSRALLTAER TALNFLSHLS GIATATASIV TAIAGT---
28 ---VLATLHG RSRSLVSAER TSLNFLQTLS ATATTTAA YV AAVA-----
29 ---VLALLQG RSRSLLSAER TSLNFMQTLS ATATTTAA YV AAVA-----
30 ---TLCTLTG PARILLTGER NAMNFIQTLS GCATATARYV QELK-----
31 ---TLCTLIG PARDLLTGER NAMNFIQTLS GCATITAQYA AKIA-----
32 ---MLFQLKG PARALLTGER SALNFLQLLS GTATRSQHYA DLVA-----
33 ---PLFHLEG PARSLLSGER SALNFLQLLS GVATRARFLA DLVA-----
34 ---ALFHLEG PARSLLTGER SALNFLQMLS GVATRAKYFA DIVA-----
35 ---VLATVRG NARNLLTAER TALNFMTHLS GIATDTKKIV DSVADY---
36 ---AFLKLAG SARSLTVER PALNFVQTLS AVATKAAFYV QQLE-----
37 ---VLCESG SARVILTGER TAMNFIQTLS GVASLTKRYV DKLA-----
38 ---LVCESG PARAILTGER TAMNFIQTLS GVASLTKLYV NKLA-----
39 ---VLCESG PARAILTGER TAMNFIQTLS GVASLTRVYV DKLA-----
40 ---LVCESG PARTILTGER TAMNFIQTLS GVATLTKHYV DKLV-----
41 ---VLCESG SARAILTGER TAMNFIQTLS GVATLTKLYV DRLA-----
42 ---ELCRLKG PSRILLTGER TALNFLQTLS ATATTTYHYS KLLD-----
43 ---TLFELEG DARTLLTGER VALNFLQTLS GTATLTSHYV KELA-----
44 ---TLFTATG SARAILTAER TALNFVQTLS GTATTTAHYV KELA-----

```

|     |     |         |             |             |             |             |       |
|-----|-----|---------|-------------|-------------|-------------|-------------|-------|
| 45  | --- | VLCQISG | NARVILTGER  | TALNFLQTLS  | GTATVVADYV  | QALG-----   | ----- |
| 46  | --- | KLVTLRG | NARRLLTGER  | TALNFIQLLS  | GTATKAHQFA  | QLLP-----   | ----- |
| 47  | --- | QLFSLEG | AARTLLTGER  | TALNFIQTLS  | GIATTVKQYT  | DLIK-----   | ----- |
| 48  | --- | VIFRMQG | PARSLLTAER  | AALNWLQTLS  | GVATACAHYA  | RRVS-----   | ----- |
| 49  | --- | ALALLTG | KARSLVTGER  | TALNWLQTLS  | GTATTVSRVY  | EKLK-----   | ----- |
| 50  | --- | TLCIIHG | TASSILTAER  | TALNFLQTLS  | ATATQTYHYV  | QKLK-----   | ----- |
| 51  | --- | RVCEVEG | NARALLSGER  | TALNLLQTLS  | GTATTIARRYA | QAVA-----   | ----- |
| 52  | --- | RIFELKG | NVRSILTAER  | TIILNFIQMLS | GTATVTNKLIV | KLIS-----   | ----- |
| 53  | --- | IICTLYG | LARPLLSGER  | TALNFLQTLS  | GTATTIAHRYA | SAVK-----   | ----- |
| 54  | --- | PVCTFAG | PARALLSGER  | TALNFLQTLS  | ATATQARHFV  | DLVA-----   | ----- |
| 55  | --- | VVCRIQG | PSRAVLTGER  | TALNFLQFLS  | GTATTARRYA  | DAVA-----   | ----- |
| 56  | --- | VLFTVSG | RARSLLTAER  | TALNFLQTLS  | GVATQARQYA  | NMVS-----   | ----- |
| 57  | --- | VFLELEG | PARSLMTGER  | AALNLLQTLS  | GTATRTRDYA  | ARVA-----   | ----- |
| 58  | --- | TLCTLRG | NTRKILTGER  | TALNFLQTLM  | GTATTARRYA  | DAVA-----   | ----- |
| 59  | --- | ELFRLHG | PARVLLTGER  | NALNFVQTLS  | GVASLTARYV  | AELA-----   | ----- |
| 60  | --- | LLCEIHG | PTRIILLTGER | TALNFIQTMS  | GIASKVKLYV  | EALK-----   | ----- |
| 61  | --- | TAAVEG  | NARALLAAER  | TALNYLTHLS  | GIATATARAV  | AEVAKY----  | ----- |
| 62  | --- | ELCRISG | PARALLTAER  | SALNFLQLLS  | GVASETRRYV  | DAVA-----   | ----- |
| 63  | --- | VVCEIEG | PARSLLTAER  | ASLNFLQLLS  | GVATATSRYA  | EAIA-----   | ----- |
| 64  | --- | VVCEITG | PARALLTAER  | PALNFLQLLS  | GVATVTRRYA  | DLIA-----   | ----- |
| 65  | --- | VLLNVSG | NARSVLTAER  | TALNIMQRLC  | GIANLTARYA  | DEIAHT----  | ----- |
| 66  | --- | TVCELRG | PARALLTAER  | NALNFLQLLS  | GVASATROQV  | DRIA-----   | ----- |
| 67  | --- | TVCELRG | PVRALLTAER  | NALNFLQLLS  | GVASATRHYV  | DAVA-----   | ----- |
| 68  | --- | TVCELEG | PARALLTAER  | NGLNFLQLLS  | GVATATRRYV  | DRVE-----   | ----- |
| 69  | --- | ETALIRG | PARGMLTAER  | TALNFLCHLS  | GVASATASIV  | AAIGAG----  | ----- |
| 70  | --- | VVLELQG | PARALLTAER  | TVLNFLQLLS  | AVASKTAEYV  | AAVQSV-P--  | ----- |
| 71  | --- | VVLEIQG | RAQALLTAER  | TALNFLQLLS  | AVASKTAGYV  | AAVQ-----   | ----- |
| 72  | --- | VVVMERS | QARALLSAER  | TALNFLQLLS  | AVATKTATYV  | ALVE-----   | ----- |
| 73  | --- | VIVEITG | PARDLLTAER  | TCLNFLQTLS  | AVATKTARYV  | NEVK-----   | ----- |
| 74  | --- | VVLEIEG | QARALLSAER  | TALNFLQMLS  | AVATKTRRYV  | DAVA-----   | ----- |
| 75  | --- | VVLEIEG | QARALLSAER  | TALNFLQLLS  | AVATKTRTYV  | DAVA-----   | ----- |
| 76  | --- | LVCEIEA | DARALLAAER  | PALNFLQLLS  | ATATLTRRHV  | DAIA-----   | ----- |
| 77  | --- | TLCVLDG | DARALLTGER  | TALNFLQMLS  | AVATRTRKFV  | EAIE-----   | ----- |
| 78  | --- | KLCAVKG | TARALLTGER  | TALNFLQLLS  | AVSTQTRSYV  | NAIS-----   | ----- |
| 79  | --- | LCEVDA  | SARVLLTAER  | TALNFLQLLS  | GTATVTRRFV  | DAVA-----   | ----- |
| 80  | --- | LCEIDG  | NGRALLTAER  | SALNFLQLLS  | AVASKARVYA  | DAIT-----   | ----- |
| 81  | --- | ALVEIRG | NARALLTAER  | PALNFLQTLS  | GVATVTRAYV  | DAVR-----   | ----- |
| 82  | --- | TLCSLSG | PARALLTAER  | CALNFLQTLS  | GTATATRQYV  | NAIT-----   | ----- |
| 83  | --- | ALMEIRG | DFSMLLKVER  | TLLNLLQHSS  | GIATLTSRFV  | EALNS-----  | ----- |
| 84  | --- | ILCNIKG | SHIHILQLER  | VLLNILAHSS  | GIATLTASYV  | RLIKD-----  | ----- |
| 85  | --- | RLVALEG | DYVSLQIER   | TLLNLLQHSS  | GIATQTRRLV  | NLIPSG----  | ----- |
| 86  | --- | VLATLSA | TSHVLLRVER  | TFLNMLLHAS  | SIATLTKKYA  | DIIEP-----  | ----- |
| 87  | --- | LVCELRG | QANSILTAER  | SALNFLQTLS  | ATATITRQYI  | EKLQ-----   | ----- |
| 88  | --- | MVAKVSG | SVINILQAER  | VALNFISYLS  | GIATKTSIFV  | KESK-----   | ----- |
| 89  | --- | LLAEMAG | DSAMLLQGER  | VALNLLQRCM  | GIATLTARYV  | EAVAGT----  | ----- |
| 90  | --- | LIAELTG | DSALLQGER   | VALNLLQRCM  | GTATLTARYV  | EAVAGT----  | ----- |
| 91  | --- | VLAWIKG | EAATLLQGER  | VALNLMQRMS  | GVATHAAAFV  | KELEGT----  | ----- |
| 92  | --- | VFATLEG | DAADLLMGER  | VALNLLQRCM  | GVATITSHFV  | QAVRGT----  | ----- |
| 93  | --- | TALRVAG | SARHILKAER  | VILNFMTHLS  | GIANLTHDYV  | TALEG-----  | ----- |
| 94  | --- | TVVRLRA | SARLLKAER   | IILNFMTHLS  | GIANLTARYV  | DALSG-----  | ----- |
| 95  | --- | IICTIEG | DLVQILKAER  | VALNFLGHLS  | GIATHTRRFV  | KKIAG-----  | ----- |
| 96  | --- | IILTVSG | PVVDLLKAER  | VALNLLQRLS  | AIATMTSLFV  | QAVEGT----  | ----- |
| 97  | --- | LVGTARG | TVRALLAAER  | TALNFLQRLS  | GVATATRRCV  | DALAAGG---- | ----- |
| 98  | --- | VAARCHG | RMRSLLAAER  | TALNIVQRAA  | GIATLAQQAV  | TSVRGS----  | ----- |
| 99  | --- | VVAEITG | SLAGILIAER  | VALNFFQRCM  | GIATATRQYV  | EAVAGT----  | ----- |
| 100 | --- | PFFRMEG | SVRSLTAER   | TALNLLQRLS  | GVATLTRRMV  | NALAGT----  | ----- |
| 101 | --- | VIVKGYG | PASEILSIER  | VLLNFLQRAS  | SISSRTRDFV  | SKVAG-----  | ----- |
| 102 | --- | CLLRGEG | SASKILSVER  | VLLNFQRAS   | GISSLTRQFV  | EIHG-----   | ----- |
| 103 | --- | ILVSGKG | LAKCLLPIER  | VMLNLIQHAS  | GIASITKQFV  | DEITG-----  | ----- |
| 104 | --- | TLVSGEA | LAIHLMPIER  | VILNFIQHAS  | GIASITRQFV  | NEVSG-----  | ----- |
| 105 | --- | CIIRGCG | SAHVLLRIER  | VFLNFIQRSC  | AVAAATRRFV  | DAVSH-----  | ----- |
| 106 | --- | VVATIEG | RAENILIGER  | VALNFLSHIS  | GIATKTNQFV  | KLAN-----   | ----- |
| 107 | --- | ILCILIG | SSKAIISAER  | VALNFLQMLS  | SVATKTHDLV  | SKIN-----   | ----- |
| 108 | --- | TIAIVNG | PARSLLTAER  | TALNFLCKLS  | GIATATATLV  | NAVRGH----  | ----- |
| 109 | --- | VIASVVG | PARAILTAER  | TALNFLCHLS  | GIATATASIV  | NAIRDH----  | ----- |
| 110 | --- | TIALVSG | PARAILTAER  | TALNFLSHLS  | GIATATASIV  | NAIRDH----  | ----- |
| 111 | --- | VIASVSG | PARGLLIAER  | TALNFLCHLC  | GIATATAGIV  | EVVRGH----  | ----- |
| 112 | --- | TVARISG | RARGLLSAER  | VALNFLMHLS  | GIATYTATFA  | DEIAHT----  | ----- |
| 113 | --- | IATIEG  | PSRGLLTGER  | TALNFLGHLS  | GIASVTAKIV  | AAIAGT----  | ----- |
| 114 | --- | VATIEG  | PSRLLTGER   | TALNFLGHLS  | GIATVTAGIA  | AAISGT----  | ----- |
| 115 | --- | HVLTISG | PARAILTAER  | TALNFVGRLS  | GVATLTADYV  | ARTEGS----  | ----- |
| 116 | --- | QVLTISG | PARAVLTGER  | TALNFVGRLS  | GIATLTADYV  | RHTAGT----  | ----- |
| 117 | --- | PVLTISG | PARAVLAGER  | TALNFVGRLS  | GIATLTADYV  | RHAAGS----  | ----- |
| 118 | --- | PILTARG | GAGLLRGWK   | VAQTLVEIWS  | GVATATREIV  | DAARAVSP--  | ----- |
| 119 | --- | LILTARG | PAGALLKSWK  | VAQTLIEIWS  | GVASGAREIV  | AAAQAVAP--  | ----- |
| 120 | --- | NLLTISG | PARAVLSGER  | TALNFVGRLS  | GVATLTANYV  | RHTAGT----  | ----- |
| 121 | --- | VIATLSG | PVRGILTAER  | VALNFLCLRLS | GIATATASVV  | AAVRDY----  | ----- |
| 122 | --- | TLMVIEG | EAAAILSAER  | VALNFVGRLC  | GIATLTAALV  | AETHGT----  | ----- |
| 123 | --- | VLMIEG  | KAASILMGER  | VALNFAGRLT  | GIATLTAAMV  | AETRGT----  | ----- |
| 124 | --- | PILAVEG | PAEALFAGWK  | VAQTLMEWAS  | GLATSAGALV  | RAAAGAP--   | ----- |
| 125 | --- | TFAVITG | NAQALLTAER  | VALNLVQRMC  | GIAGLTAQYV  | KEIEGT----  | ----- |
| 126 | --- | TIAEIEG | EAASILSAER  | VALNFAGRLS  | GIATQTAAFV  | AETAGT----  | ----- |
| 127 | --- | VLISVTC | RARGLLAAER  | IILNFMGRMS  | GIATFTRAYV  | DAVEGT----  | ----- |

|     |     |          |             |            |            |             |            |
|-----|-----|----------|-------------|------------|------------|-------------|------------|
| 128 | --- | VVARLSG  | SARSILTAER  | TMLNFLGRLS | GVASLTRQYV | DAVAHT----  | -----      |
| 129 | --- | TLLKIKG  | KARALLECEC  | SALNLCQHLS | GIATMTRDYV | EAIKGT----  | -----      |
| 130 | --- | DLMRLEG  | NARAMLTAER  | SALNTVQHLS | GVATLTRQYV | DAMGET----  | -----      |
| 131 | --- | DVMRLSG  | NARAMLTAER  | SALNTVQHLS | GIATMTRQYV | DAIAGT----  | -----      |
| 132 | --- | DLMRLEG  | NARAMLTAER  | SALNTVQHLS | GIATMVREYV | DAMDNP----  | -----      |
| 133 | --- | AIATIDG  | PARGLLTGER  | VALNFLGHLS | GIATATAGIA | DAIAHT----  | -----      |
| 134 | --- | TVAEVAG  | AARTILAAER  | TALNFLGHLS | GIATRTRRFV | DAIAHT----  | -----      |
| 135 | --- | LLL VATG | PAEAVLAGWK  | VAQTLMEYAS | GIASATARIV | DAARAANP--  | -----      |
| 136 | --- | VLAEMEG  | PARGLLTAER  | TALNLLQLLS | GIATLTSQYA | KRIQGT----  | -----      |
| 137 | --- | TIFTLRG  | PARGILTGER  | VALNFFQNL  | AVASLTSQFV | EKVA-----   | -----      |
| 138 | --- | TVAVIRH  | NARVLLSCER  | VILNVIQRMS | GIATATRRFV | DAIAGT----  | -----      |
| 139 | --- | IFATVRG  | RARTLLECEC  | VALNFLQRLS | GVATLARRYA | DAVAGT----  | -----      |
| 140 | --- | VIAELHG  | PAAALLSGER  | VVLNLIQRLS | GIATMTREAV | RCLDD-----  | -----      |
| 141 | --- | VIATIQG  | PVHHVLFGER  | VLLNLIQRMS | GIATVTRKAI | DTLND-----  | -----      |
| 142 | --- | IATVQGG  | PIASLLTAER  | VILNVIQRMS | GIATMTRKAV | LALDS-----  | -----      |
| 143 | --- | TIARLKG  | RAASLMTGER  | VVLNLIQRMS | GIATLTKQSI | IRLND-----  | -----      |
| 144 | --- | QLARFTG  | PVKSLLSGER  | VLLNLLQRCM | GIATLTAKAV | EELGD-----  | -----      |
| 145 | --- | TIAVASG  | PVGPLLSGER  | VILNLLQRLS | GIATVTRQAV | DLLGN-----  | -----      |
| 146 | --- | IIAAVKA  | PVRTLLSGER  | VILNLMQRMS | GIASQTNFAI | KQLDD-----  | -----      |
| 147 | --- | LVLEIIG  | SVRSLLTCEC  | VALNFLQHL  | GIASMTAAYV | EALGD-----  | -----      |
| 148 | --- | IIGRVFG  | STHSILSGER  | TALNLMQILS | GIATTTSNLN | KRLEG-----  | -----      |
| 149 | --- | HFGQVSG  | DAKKILMGER  | VALNYMQRCM | GIATLTREFV | ERLEG-----  | -----      |
| 150 | --- | LIAKIKG  | NTRSILTGER  | VALNMLQKIS | GIATITNKFV | KEIKG-----  | -----      |
| 151 | --- | IIAKIKG  | NTRALLKGER  | TALNLLQRLS | GIATKTRQLA | DKIKD-----  | -----      |
| 152 | --- | VIAKIYG  | PAAVILMGER  | VALNYLQFLS | GIATKTRRII | NKVKD-----  | -----      |
| 153 | --- | RIARVEG  | KMSTLLSGER  | VALNFLQRLS | GIASKTRNMA | ESIKY-----  | -----      |
| 154 | --- | ILGTITG  | SARSILRSE   | IALNFIQRTS | GIATLTSQYV | AEVKGT----  | -----      |
| 155 | --- | SLGAIITG | SARAILRAER  | IALNFTQRMS | GIATQTARYV | EAVAGT----  | -----      |
| 156 | --- | VILRISG  | PLRVLLTAER  | VALNIVSHLS | GIATHTSKWV | KQVAG-----  | -----      |
| 157 | --- | EVARVEG  | KIQHILMLER  | TLNLSHAS   | GIATQTRAWV | DAVEAAATS-  | -----      |
| 158 | --- | AVLGVVA  | PTRGLLTAER  | TLNLSHAS   | GIATATAAWV | DAVEG-----  | -----      |
| 159 | --- | AVLTVTA  | PTQGLLTAER  | TMLNLVCHLS | GIATATSAAV | DAVEG-----  | -----      |
| 160 | --- | KLLTVTT  | RTRDLLTAER  | SALNLLCRLS | GIATATRAWA | DALAA-----  | -----      |
| 161 | --- | TIATVSG  | PAGSVLTAER  | VALNFAQRMS | GIATLTSQYV | RAVAHT----  | -----      |
| 162 | --- | TLARVTG  | NARAVLLAER  | VALNLVQRLS | AIATRTAEFV | DLVQGT----  | -----      |
| 163 | --- | HLARVSG  | SARSVLLAER  | VGLNLVQRMS | AIATKTAEFV | RLVEGT----  | -----      |
| 164 | --- | VVMRVAG  | PTRGLLTAER  | TALNYASHLS | GVATATAHWV | DALAG-----  | -----      |
| 165 | --- | ILMTVTA  | RTRDLLTAER  | TALNFLTMLS | GIATATRAWV | DAVAG-----  | -----      |
| 166 | --- | TVAYVNG  | PVRGLLTAER  | TALNLLCHLS | GIATLTRAUV | DAVAG-----  | -----      |
| 167 | --- | TVARVNG  | PVRGLLTAER  | TALNLLCHLS | GIATLTRSUV | DAVAG-----  | -----      |
| 168 | --- | RLLTVSG  | PARSLLTAER  | TALNLAHLS  | GIATATARUV | AEIAG-----  | -----      |
| 169 | --- | ILATVEG  | PVRDLLTAER  | IALNFTQRMS | GIATMTAAUV | DAVNAIYGDD  | YDGPVTRPRR |
| 170 | --- | VIAEVAG  | PARPVLLAER  | VALNLLMLRC | GVATLTRRYA | AAVEGT----  | -----      |
| 171 | --- | LILKIKG  | NVKTILSAER  | TALNYLQRLS | GIATYQKQMV | EALDD-----  | -----      |
| 172 | --- | PIVRLSG  | SARDLLTSE   | VLLNLSRLC  | GVATLTGRYV | EAIGE-----  | -----      |
| 173 | --- | TLLKIEG  | SLVQILRIER  | ILLNFIQYLS | GISTTTGEVV | KKYGQK----  | -----      |
| 174 | --- | VVATMAG  | NLGSLLTGER  | VALNLVMGLS | GIATMTRQYV | QAIAD-----  | -----      |
| 175 | --- | RLLDLEG  | PATALVAGER  | TALNLAHLS  | GIATATAELV | AQLQG-----  | -----      |
| 176 | --- | VIAELEG  | PLASLLSGER  | AALNVAMRLS | GVATATRRFV | DQLAD-----  | -----      |
| 177 | --- | RLELEGG  | PATALVAGER  | TALNLAHLS  | GIATATGELV | AQLDG-----  | -----      |
| 178 | --- | RLELRGG  | PAEQLVAMER  | TALNLAHLS  | GIATATAVLV | AQLEG-----  | -----      |
| 179 | --- | EVVQIKG  | SLRGILAAER  | LALNLLQRLS | GIATLTRTYV | EALRGT----  | -----      |
| 180 | --- | EVAHLKG  | SLKGILAGER  | LALNLLQRLS | GIATLTRTYV | EALRGT----  | -----      |
| 181 | --- | IVARIAA  | PLETLLGGER  | LALNCLMRLS | GIATLTHTYV | QAIAD-----  | -----      |
| 182 | --- | VIAVVEG  | PVRSLMGER   | VALNLLQRLS | GIATITRRYV | ERLAG-----  | -----      |
| 183 | --- | VVAEIHG  | SLDALLMGER  | VALNLAHLS  | GIATLTNTYV | EKIAD-----  | -----      |
| 184 | --- | KIMDLNG  | PVASLLAGER  | TALNLAHLS  | GVATATKRLV | SKLQG-----  | -----      |
| 185 | --- | KLLELNG  | PSRSLASER   | ISLNSMHL   | GISTYTKNIV | DVLKG-----  | -----      |
| 186 | --- | DLRLEG   | QASALAAVER  | TALNLAHLS  | GVATATAALV | DQLRG-----  | -----      |
| 187 | --- | RLELKG   | SSSVLVAER   | VSLNVAMHL  | GIATSTALLV | TKLSG-----  | -----      |
| 188 | --- | KLEIYG   | PSKSLASER   | IGLNIAHLS  | GISTYTKNIV | NKLEG-----  | -----      |
| 189 | --- | KLELGG   | PSRSLASER   | ISLNSMHL   | GISTYTKNIV | DVLKG-----  | -----      |
| 190 | --- | VVAKLDG  | SLDSSLTGER  | VALNLGMRLS | GIATMTRKYV | EKIAG-----  | -----      |
| 191 | --- | VAMIVEG  | KIQSLLQTER  | LMLNVMQRMS | GIATMTRKYV | KQLEG-----  | -----      |
| 192 | --- | VILRVEG  | SYRALLQAE   | LALNFLQRLS | GIATMTARYA | EALKG-----  | -----      |
| 193 | --- | LLATVEG  | PGRALLTAER  | PAINFVGRS  | GIATRTRRFV | DAVSHT----  | -----      |
| 194 | --- | IALTVNG  | SVHSILIAER  | LVLNTMQRMS | GIATYTHSLQ | ELIAH-----  | -----      |
| 195 | --- | IAFYVEG  | SSQSILKSER  | LVLNAMQRMS | AIATKTAEFV | QKLEG-----  | -----      |
| 196 | --- | RVLEVKG  | RIASILGGER  | TALNFMQRMS | GIATRTNMYV | ERVSHT----  | -----      |
| 197 | --- | VVLEVQGG | LLAPLLVAER  | TALNFMQRMS | GIATRARAYV | DAIAHT----  | -----      |
| 198 | --- | MFLSAEG  | SAASLHAGWK  | VALNLLEYAS | GIATRTAAIV | NSARAVNP--  | -----      |
| 199 | --- | LVLEVSG  | KLAPLLVGER  | TALNFMQRMS | GIATKTKLFV | EKVSHT----  | -----      |
| 200 | --- | RVFVDHG  | LLAPILLGER  | TALNFMQRMS | GIATKTRAFV | DLVSHT----  | -----      |
| 201 | --- | VVMVLNG  | RVINILKCE   | TALNFLTMLS | GIASLTAKYI | SKVEG-----  | -----      |
| 202 | --- | VIGSVTG  | PARPILLSGER | VALNLLQRLS | GIATLTRRYV | DALKGG----- | -----      |
| 203 | --- | EVARVRG  | PLRGILAGER  | LALNLLQRLS | GIATLTRAUV | EALAGT----  | -----      |
| 204 | --- | ILAILGG  | DAKSLIGER   | LSLNILQRLS | GIATATRRFV | EKLKG-----  | -----      |
| 205 | --- | VIGEIEG  | NTYKLLVAER  | TLNVLVSMF  | SVATTTTRFV | EKLKHK----  | -----      |
| 206 | --- | PFLKVKG  | NTKTIITLER  | TALNFMHL   | GISTKTNRII | NEVRKIN---- | -----      |
| 207 | --- | TIFRLRG  | GAISILRAER  | LSNFLGHLS  | GIATLTRNCV | DAVRKHSES-  | -----      |
| 208 | --- | AIFEAEG  | DLKLLFRYWR  | VSQFTLIMC  | AIATKTASLV | SAGRKANP--  | -----      |
| 209 | --- | IIFRLKG  | GAVSILRAER  | LALNFLGHLS | GIATLTRACV | DTVROYSVT-  | -----      |
| 210 | --- | IIFRLKG  | GAVSILRAER  | ISNFLGHLS  | GIATLTRKCM | DIARKHSET-  | -----      |

```

211 ---ILFEAEG DLRKLFKLWR ISQTFLSMTC AIATKTRKMV DKAREVNP-- -----
212 ---TILEISG NAVSVLRAER IVLNFLGHLS GIATNTREYV ETVRQYSD-- -----
213 ---EVMSIQG SARNILRGER VALNILGRMS GIATLTRECV LRA----QK- -----
214 ---VIVTLTG QAHTILLLER TLLNILGRMS GIATRARKMQ DLVSAINPG- -----
215 ---VLELEEG RARAILLLER TALNIGRMS GIATRTRESV DAVRAVSPA- -----
216 ---VILEFEG KAKDILMVER TILNYLMHLS GIATLVSNTC KKVHEINPK- -----
217 ---IVLKAYG EATALLAAER VALNFLMRLS GIATATRQVV ERVREVPD- -----
218 ---TVLRVSG AAQSVLRAER VAVNVAGHAS GVATKTRRAV AAAREASDD- -----
219 ---VVLRVGD PAQSVLRGER VAVNITGHAS GVATKTRAAV DAAESVATDS G-----
220 ---TVLRVSG AASDVLRGER VAVNIAGHAS GVATKTRTAV ERARAVAPD- -----
221 ---VIAEVKG NARAILLVER TALNIGRMS GIATETRKLV EKVRKVNPR- -----
222 ---VILELKG NARAILLVER TALNIMGRMS GIATETRKLV EKVKRVNPN- -----
223 ---VIMEVKG NARAILLVER TALNIGRMS GIATETRRLV DIVREVPNK- -----
224 ---VILELEG NARAILLVER TALNVMGRMS GIATEVRKLV EKVKSVNPK- -----
225 ---GVLEVAG EARRILLFER TLLNLLIYTF SVATTTRMMV EAAHRINPR- -----
226 ---IVLNFEQ DAD-ILTVER LILNFLGKLS GIATITNLMV KKAKEVNPY- -----
227 ---IVLEIEG DAETILGVER LVLNLLGKLS GISTVTHMT RLAKSVNPN- -----
228 ---NILIFQG DAEAVLGVER LVLNMLSRLS AIATETRKMV NIAREINPK- -----
229 ---KILCFRG EASEALKVER VLLNLLMHAS GIATYTRKLV AKAKSANPR- -----
230 ---VVLRAVG EARCLHAAWR TAQEVVAWAS GVATKTRRLV ELARRVNP-- -----

```

: . :

....|....| ....|....| ...|....| ....|....| ....|....| ....|....|

```

156 166 176 186
1 --GTQIQ--- --LLDTRKTL PGLRTALKYA VLCGGGANHR LGLTDAFLIK ENHI-----
2 --GTNTQ--- --LLDTRKTL PGLRSALKYA VLCGGGANHR LGLSDAFLIK ENHI-----
3 --TKAKIR--- ---DTRKTL PGLRALQKYA VRVGGGVNHR LGLGDAALIK DNHV-----
4 --TKAKIR--- ---DTRKTL PGLRALQKYA VRVGGGVNHR LGLGDTALIK DNHV-----
5 --TKAQR--- ---DTRKTL PGLRALQKYA VRVGGGVNHR LGLGDAALIK DNHV-----
6 --TNAKIR--- ---DTRKTL PGLRALQKYA VRVGGGVNHR MGLGDAALIK DNHV-----
7 --TKAKIR--- ---DTRKTL PGLRLLQKYA VRVGGGVNHR MGLGDAALIK DNHV-----
8 --TGAQIR--- ---DTRKTL PGLRALQKYA VRVGGGTNHR MGLGDAALIK DNHV-----
9 -----WT GHVAGTRKTT PGFRLVEKYG LLVGGAAASHR YDLGGLVMVK DNHV-----
10 ---GLKTQ--- --LLDTRKTL PGLRTALKYA VLCGGGNHR LGLSDAFLIK ENHI-----
11 -----WT GHVAGTRKTT PGFRLVEKYG LQVGGAAACHR YDLGGMVMVK DNHV-----
12 -----WT GHVAGTRKTT PGFRLVEKFG LLVGGAAASHR YDLGGLVMVK DNHV-----
13 -----WP GQVIGTRKTT PGFRLPEKYG LLVGGAGTHR YGTTDLVMLK DNHV-----
14 ---SPAC--- --ILETRKTA PGLRLVDKWA VLI GGGRNHR MGLFDMVMIK DNHI-----
15 ---HPAC--- --ILETRKTA PGLRLVDKWA VLI GGGRNHR IGLFDMVMIK DNHI-----
16 -----WH GVIAGTRKTT PGFRLVEKYG MHIGGADMHR VDLSGMIMLK DNHL-----
17 -----YK GTIAGTRKTT PGLRRLEKYS MLVGGCDTHR YDLSSMVMLK DNHI-----
18 -----YR GTVAGTRKTT PGLRRLEKYA MLVGGCDTHR YDLSSMVMLK DNHI-----
19 -----YT GIIAGTRKTT PGLRQLEKYA MLI GGVDTHR YDLSSMVMLK DNHI-----
20 -----WK GVVAGTRKTT PGFRLVEKYG MMVGGVDPHR HDLSSMVMLK DNHI-----
21 ---QQQPWK GKIAGTRKTT PGFRLVEKLA LLTAGLDTHR MDLSSMIMLK DNHI-----
22 --GTNTQ--- --LLDTRKTL PGLRSALKYA VLCGGGANHR LGLSDAFLIK ENHI-----
23 --GTRTR--- --LLDTRKTL PGLRTALKYA VSCGGGDNHR LGLSDAFLIK ENHI-----
24 --GLKTQ--- --LLDTRKTL PGLRTALKYA VLCGGGNHR LGLFDAFLIK ENHI-----
25 --TKTKLR--- ---DTRKTI PGLRSSLKYA VLCGGAENHR FGLFDGILIK DNHI-----
26 --GTGTT--- --LLDTRKTV PGLRTALKYA VLCGGGSNHR LGLADAFLIK ENHI-----
27 --KTVVV--- ---CTRKTL PGIRTLQKYA VRAGGGMNHR FALYDAMLIK DNHI-----
28 --GTGAR--- --ILDTRKTL PGLRAAQKYA VRCGGGDNHR IGLFDTVMLK ENHI-----
29 --GTRAR--- --ILDTRKTL PGLRAAQKYA VRCGGGNHR IGLFDTVMLK ENHI-----
30 --GTQCR--- --LLDTRKTI PGLRSALKYA VACGGGYNHR IGVFDAYLIK ENHI-----
31 --HTECR--- --LLDTRKTI PGLRSALKYA VACGGGYNHR IGVFDAYLIK ENHI-----
32 --GTAVK--- --LLDTRKTL PGLRLAQKYA VTCGGCHNHR IGLYDAFLIK ENHI-----
33 --GTQVR--- --LLDTRKTL PGLRLAQKYA VTCGGCDNHR IGLYDAFLIK ENHI-----
34 --GTQVK--- --LLDTRKTL PGLRMAQKYA VTCGGCHNHR IGLYDAFLIK ENHI-----
35 --PAQIT--- ---CTRKTI PGLRIVQKYA VRCGGGRNHR LGLDDAILIK DNHI-----
36 --GLHTK--- --LLDTRKTL PGLRIAQKYA VALGGGNHR LGLFDAFLIK ENHI-----
37 --GTQTR--- --LLDTRKTI PGLRTAQKYA VTCGGGKNHR IGLFDAFLIK ENHI-----
38 --GHTQ--- --LLDTRKTI PGLRTAQKYA VTCGGGKNHR IGLFDAFLIK ENHI-----
39 --GTDRC--- --LLDTRKTI PGLRTAQKYA VSCGGGKNHR IGLYDAFLIK ENHI-----
40 --GTHTR--- --LLDTRKTI PGLRTAQKYA VTCGGGKNHR IGLYDAFLIK ENHI-----
41 --GTHCK--- --LLDTRKTI PGLRTAQKYA VTCGGGKNHR IGLFDAFLIK ENHI-----
42 --GYKTQ--- --LLDTRKTL PGMRLAQKYA VRCGGGVNHR IGLFDAYLIK ENHI-----
43 --GSETK--- --LLDTRKTL PGLRSAQKYA VLCGGGVNHR IGLFDAFLIK ENHI-----
44 --GTRKQ--- --LLDTRKTI PGLRILQKYA VKCGGANHR IGLYDAFLIK ENHI-----
45 --DSNTK--- --LLDTRKTL PGMRLAQKYA VTCGGGKNHR IGLFDAYLIK ENHI-----
46 --NSNCK--- --ILDTRKTI PGLRTAQKYA ITCGGCHNHR IGLYDMFLIK ENHI-----
47 --DTDCK--- --LLDTRKTL PGLRHASKYA VLCGGGLNHR IGLYDAYLIK ENHI-----
48 --HTNVR--- --LLDTRKTL PGLRLAQKYA VTCGGCDNHR LGLWDAFLIK ENHI-----
49 --GTPAH--- --LLDTRKTL PGLRYAQKYA VRCGGGKNHR MGLYDAFLIK ENHI-----
50 --GTRAK--- --LLDTRKTI PGLRLAQKYA VYCGGGLNHR MGLYDAFLIK ENHI-----
51 --GTGVK--- --VLDTRKTL PGLRLAQKYA VRCGGCHNHR AGLYDAVLIK ENHI-----
52 --QYKTK--- --LLDTRKTI PGFRLAQKYA VRCGGGFNHR IGLFDAYLIK ENHI-----
53 --GLPVR--- --ILDTRKTL PGLRQAQKYA VRCGGGNHR HGLYDGILIK ENHI-----
54 --GTHAR--- --ILDTRKTL PGLRAAQKYA TRCGGALNHR QGLYDAILIK ENHI-----
55 --GTGVQ--- --LLDTRKTV PGLRAAQKYA VRAGGGSNHR FGLFDAYLIK ENHI-----
56 --HTKAK--- --VLDTRKTL PGLRVAQKYA ASCGGCRNHR IGLWDAFLIK ENHI-----
57 --DTGVA--- --LLDTRKTL PGLRLAQKYA VTCGGGKNHR LGLHDAFLIK ENHI-----
58 --GSQVT--- --ILDTRKTL PGLRAGQKYA VLCGGCQNH IGLYDAFLIK ENHV-----
59 --DTDCR--- --LLDTRKTL PGLRSAQKYA VTCGGGKNHR IGLFDAYLIK ENHI-----

```

60 --DTKIK--- --LLDTRKTL PGLRTASKYA VLCGGGNHR IGLTDAFLIK ENHI-----  
61 --GTDIV--- ---CSRKTI PLLRVLQKYA VRAGGGVNRH MGLDDAVLIK DNHL-----  
62 --GHRAR--- ---ILDTRKTL PGLRLAQKYA VTAGGGDNQR IGLFDGILIK ENHI-----  
63 --GTRAR--- --VLDTRKTL PGLRLAQKYA VRIGGGENQR LALYDGILIK ENHI-----  
64 --GTNAR--- --VLDTRKTL PGLRLAQKYA VRIGGGENQR LALYDGILIK ENHI-----  
65 --KARLI--- ---DSRKT PGLRALEKHA VTCGGGLNHR LSLDNGVMIK DNHI-----  
66 --DTRAR--- --ILDTRKTL PGLRLAQKYA VRVGGGANQR LALYAGILIK ENHI-----  
67 --HTRTR--- --ILDTRKTL PGLRLAQKYA VRVGGGANQR LALYDGILIK ENHI-----  
68 --GTRAK--- --ILDTRKTL PGLRLAQKYA VRVGGGENQR LALYDGILIK ENHI-----  
69 --HTKVT--- ---CTRKT PGLRAVQKYA VRVGGGSNHR YGLDDAVLIK DNHV-----  
70 --GSRAQ--- --IVDTRKTL PGLRLAQKYA VRAGGGSNHR LGLYDALLIK ENHI-----  
71 --GTRAQ--- --IVDTRKTL PGLRLAQKYA VRTGGGTNHR IGLYDAVLIK ENHI-----  
72 --GTKAR--- --IVDTRKTL PGLRLAQKYA VLTGGGTNHR VGLYDAVLIK ENHI-----  
73 --GTRAV--- --ILDTRKTI PGLRVAEKYA VRCGGGKNRH MGLFDAMLIK ENHI-----  
74 --GTRAQ--- --IVDTRKTL PGLRLAQKYA VRMGGGTNHR IGLHDAVLIK ENHI-----  
75 --GTRAH--- --IVDTRKTL PGLRLAQKYA VRTGGGTNHR IGLHDAVLIK ENHI-----  
76 --GASPNPRG CAILDTRKTL PGLRQAQKYA VRTGGGQNRH LALWHGILIK ENHI-----  
77 --GTGQ--- --IVDTRKTL PGLRLAQKYA VRCGGGVNHR TGLYDGILIK ENHI-----  
78 --GTGAV--- --IVDTRKTL PGLRLAQKYA VKCGGVTNHR IGLYDGILIK ENHI-----  
79 --GTRAK--- --IVDTRKTL PGLRLAQKYA VSVGGGTNHR VGLYDGILIK ENHI-----  
80 --GTAKQ--- --VVDTRKTL PGLRIAQKYA VRAGGGGNHR LALWDAILIK ENHI-----  
81 --GTGAA--- --IVDTRKTL PGLRLAQKYA VRTGGGQNRH IGLYDGILIK ENHI-----  
82 --GTRAR--- --ILDTRKTL PGLRIAQKYA VRIGGGLNQR IGLYDGILIK ENHI-----  
83 --HKVRL--- ---DTRKTR PLLRIFEKYS VLNNGASNHR LGLDDALMLK DTHL-----  
84 --MHVKLL--- ---DTRKTR PLLRQLEKYS IVNGGGNHR FGLDSMLMLK DTHL-----  
85 --SNLKIL--- ---DTRKTR PLLRAFEKYS VRNNGGINHR LGLDDCLMLK DTHL-----  
86 --YGVKLL--- ---DTRKTR PMLRVFEKYA TRCGGAVNHR MGLDDSLMIK DTHL-----  
87 --GSHTQ--- --LLDTRKTM PGLRLAQKYA VHCGGGTNHR IGLYDAILIK ENHI-----  
88 --GNVKIL--- ---DTRKTL PAYRMLAKYA VKCGGGENHR IGLYDMILIK DNHI-----  
89 --GARIV--- ---DTRKTM PGLRVLDKHA VRLGGGINHR TGLYDGVLIK ENHI-----  
90 --RARIV--- ---DTRKTT PGLRVLEKYA VRVGGGINHR TGLYDGVLIK ENHI-----  
91 --GAAVV--- ---DTRKTT PGLRVLEKYA VRVGGGNHR TSLYDGVLIK ENHV-----  
92 --RTRIV--- ---DTRKTT PGLRELEKYA VRVGGGFNHR TGLYDGVLIK ENHI-----  
93 ---THTR--- --LLDTRKTL PGLRHVEKYA VLVGGGLNHR IDLAEMMLK DNHI-----  
94 ---TGTR--- --LLDTRKTL PGLRYPEKYA VVIGGGLNHR RNLQEMMLK DNHI-----  
95 ---TKTK--- --ILDTRKTT PAFRDLEKRA VVHGGGVNHR MNLSDAILIK DNHI-----  
96 --GVRIT--- ---DTRKTT PGLRMLEKYA VLAGGGSNHR FNLADGVMIK DNHI-----  
97 ---GRTR--- --LLDTRKTT PGWRMLEKAA VRAGGKGNHR FSLGDGVLIK DNHV-----  
98 ---NLR--- --VLDTRKTP PGMRTVAKEA VRMGGASNHR FGLFDGVLIK DNHI-----  
99 ---KAK--- --ILDTRKTA PGLRILDKYA VRIGGGANHR FGLSNAVLIK DNHI-----  
100 ---SCR--- --LLDTRKTT PLWRVLEKAA VRHGGGSNHR FGLFDGVLIK DNHV-----  
101 --TKAKIR--- ---STRKTS PGLRNFPLYA VRVGGGESYR DGLYNGIMVK DNHI-----  
102 --TNAIR--- ---STRKTC PGLRKFPLYA VHVGGGESFR TGLFDGVLIK DNHI-----  
103 --TKAKIR--- ---STRKTT PGLRILDKYS VHIGGGENYR NSLYDGILIK DNHI-----  
104 --TKAKIR--- ---STRKTT PGLRMLDKYS VCVGGGENYR NSLYDGVLIK DNHI-----  
105 --TKAKIR--- ---DTRKTT PGMRCVEKYA VKVGGGSYR NSLNDRVLLK DNHI-----  
106 --KTKIC--- ---CTRKTI PTLRVIQKYA VTLGGGTNHR FNLSDEFLIK DNHI-----  
107 --HTNAQ--- --LIDTRKTI PGLRLAQKYA VKCGGGVNRH MGLYDCVMLK ENHI-----  
108 --NAKIV--- ---CTRKTT PGLRVLEKYA VRAGGGANHR FALDDAVLIK DNHI-----  
109 --PVKIT--- ---CTRKTT PGLRAVEKYA VRAGGGANHR FGLDDAILIK DNHI-----  
110 --KAKIV--- ---CTRKTT PGLRAVEKYA VRAGGGGNHR FGLDDAILIK DNHI-----  
111 --KAQIV--- ---CTRKTT PGLRALEKYA VRAGGGSNHR FGLDDAILIK DNHI-----  
112 --GAKVC--- ---CTRKTI PGLRALEKYA VRLGGGSNHR YGLDDAVLIK DNHI-----  
113 --KASVA--- ---CTRKTT PGLRALEKYA VRAGGGMNHR FALYDAVLIK DNHI-----  
114 --KASVA--- ---CTRKTT PGLRALEKYA VRAGGGMNHR FALYDAVLIK DNHV-----  
115 --RMRIC--- ---CTRKTT PGLRALEKYA VRCGGGFNHR FGLDDAILIK DNHI-----  
116 --KMRIC--- ---CTRKTT PGLRALEKYA VRCGGGFNHR FGLDDAILIK DNHI-----  
117 --KLRIC--- ---CTRKTT PGLRALEKYA VRCGGGFNHR FGLDDAILIK DNHI-----  
118 --HIAVA--- ---CTRKNT PGTKRFAVAA VKSGGAVMHR LGLSETILVF GEHR-----  
119 --EVVVA--- ---CTRKNT PGTKRYAAAA VKAGGAVMHR LGLSESIILF PEHR-----  
120 --KLRIC--- ---CTRKTT PGLRALEKYA VRCGGGFNHR FGLDDAVLIK DNHI-----  
121 --KAKIV--- ---CTRKTT PGLRAIEKYA VRVGGGSNHR FGLDDAVLIK DNHV-----  
122 --NARIT--- ---CTRKTT PGLRLVEKQA VLGGGGFNHR YLSDAILIK DNHI-----  
123 --QARIT--- ---CTRKTT PGLRMVEKLA VLGGGGFNHR YLSDAILIK DNHI-----  
124 --GTVVA--- ---CTRKT PGTALAFKA VTAGGATLHR TGLSDTVLLF PEHR-----  
125 --GAILL--- ---DSRKT PGLRMIEKYA VVCGGGRSHR LGLDSGIMLK DNHI-----  
126 --KARIT--- ---CTRKTT PGLRLVEKQA VLGGGGFNHR FGLSDAILVK DNHI-----  
127 --GARIA--- ---HTRKTT PGFRAFELQA VQAGGGALHR FGLDDAILIK DNHV-----  
128 --KTRIV--- ---CTRKTT PGHRALEKRA VRCGGGTSHR YGLDDAILIK DNHI-----  
129 --GTILL--- ---DTRKTI PGLRLLEKYA TRMGGQNRH MGLDDGAMIK DNHI-----  
130 --QARLL--- ---DTRKTI PGLRHLEKYA VRTGGGTNHR MGLWDAAMIK DNHV-----  
131 --GATLL--- ---DTRKTI PGLRVLEKYA TRMGGAKNHR MGLWDAAMIK DNHV-----  
132 --DCTLL--- ---DTRKTI PGLRHLEKYA TRMGGASNHR MGLWDAAMIK DNHV-----  
133 --KARIC--- ---CTRKTT PGLRAVEKYA VRAGGGSNHR FGLDDAVLIK DNHI-----  
134 --RARLT--- ---CTRKTT PGLRLEKYA VRCGGGSNHR FGLDDAVLIK DNHI-----  
135 --GVVVA--- ---CTRKTF PGTKAVAIKA VIAGGGVPHR LGLSDSVLLF PEHR-----  
136 --GCTLL--- ---DTRKTI PGLRRLSKYA TRCGGAKNHR MGLYDGVLIK DNHI-----  
137 --GTGCR--- --IVDTRKTV PGMRLVQKYA VRVGGGNHR MGLDDGVLIK ENHI-----  
138 ---HAK--- --ILDTRKTV PGLRVLDKYA VRCGGGTNHR LDLSDGVLIK NNHI-----  
139 ---GCR--- --VIDTRKTT PGLRALEKAA ARTGGITNHR AGLYDAILIK NNHI-----  
140 --EQIKIC--- ---DTRKTT PGLRMLLEKYA VRAGGGYNHR FGLYDGMIMK DNHI-----  
141 --PSIRIC--- ---DTRKTT PGLKLFKYEYA VRSGGGVNHR LNLSDMVLIK DNHI-----  
142 --SHTRIC--- ---DTRKTM PGLRMFDKYA VVCGGGFNHR FGLYDGMIMK DNHI-----

|     |              |            |            |             |             |             |
|-----|--------------|------------|------------|-------------|-------------|-------------|
| 143 | -PNIAIC---   | ----DTRKTT | PGLRILEKYA | VKTGGGSNHR  | FGLDGGIMIK  | DNHI-----   |
| 144 | -PSIRVC---   | ----DTRKTA | PGLRMFDKFA | VRIGGGANHR  | FGLDDALMLK  | ENHI-----   |
| 145 | -SSTRIC---   | ----DTRKTT | PGLRMLEKYA | VTGGGGYNHR  | FGLYDGVMIK  | DNHI-----   |
| 146 | -SAIRIC---   | ----DTRKTA | PGLRAFDKYA | VQTGGGFNHR  | NGLYDGVMLK  | DNHI-----   |
| 147 | -DCIKVF---   | ----DTRKTT | PNLRLFKEYA | VRVGGGYNHR  | FNLSDAILLK  | DNHI-----   |
| 148 | -TGVKLL---   | ----DTRKTT | PGMRLLKEYA | VKIGGGYNHR  | FGLSDGILLIK | DNHI-----   |
| 149 | -TKVKLL---   | ----DTRKTT | PNMRIFEKYA | VKVGGGTNHR  | FGLNDGVMIK  | DNHI-----   |
| 150 | -TKAKLL---   | ----DTRKTT | PNLRFVEKYA | VKVGGGYNHR  | FSLSDGVLIK  | DNHI-----   |
| 151 | -LPAKLV---   | ----DTRKTT | PGLRVLEKYA | VRVGGGYNHR  | FCLSDGVLIK  | DNHI-----   |
| 152 | -YPPRVV---   | ----DTRKTV | PGLRWLSKYA | VRVGGGHNHR  | FNLSDGILLK  | DNHI-----   |
| 153 | -QHAVLV---   | ----DTRKTT | PGLRLLEKYA | VRVGGAKNHR  | FGLYDGVMIK  | DNHI-----   |
| 154 | --KARIV---   | ----DTRKTT | PGLRIIERQA | VRDGGGFNHR  | ATLSDAVMVK  | DNHL-----   |
| 155 | --GARIV---   | ----DTRKTT | PGLRIIERQA | VRDGGGHNHR  | TSLSDAVMVK  | DNHL-----   |
| 156 | -TETRIR---   | ----DTRKTL | PGLRQLQKYA | VVCGGGINHR  | MGLGDAALIK  | DNHI-----   |
| 157 | PQGCKVR---   | ----DSRCTL | PGMRMLEKRA | IVHGGGYPHR  | YNLGDQVMVK  | DNHV-----   |
| 158 | -TDCKIR---   | ----DSRCTL | PGLRALQKYA | VRVGGGVNHR  | MGLGDAALIK  | DNHV-----   |
| 159 | -TGAKIR---   | ----DSRCTL | PGLRGLQKYA | VRVGGGVNHR  | MGLGDAALIK  | DNHV-----   |
| 160 | -TDTKVR---   | ----DTRKTT | PGLRSLEKFA | VRCGGGVNHR  | MSLSDAALVK  | DNHV-----   |
| 161 | --SARIV---   | ----DTRKTT | PGLRAFERHA | VRCGGGGNHR  | FSLSDAVMAK  | DNHL-----   |
| 162 | --KARIT---   | ----DTRKTT | PGLRVLEKYA | VRCGGGANHR  | FSLSDAVLAK  | DNHL-----   |
| 163 | --RARIT---   | ----DTRKTT | PGLRVLEKYA | VRCGGGANHR  | YLSDAVLAK   | DNHL-----   |
| 164 | -TRARVL---   | ----DTRKTL | PTFRALQKYA | VRCGGGVNHR  | FSLGDRAMVK  | DNHV-----   |
| 165 | -TKAAIR---   | ----DSRKTH | PGLRVLEKYA | VRCGGGVNHR  | FGLADAALIK  | DNHI-----   |
| 166 | -TGAMIR---   | ----DTRKTL | PGLRALEKYA | VRCGGGVNHR  | MSLTDAALIK  | DNHV-----   |
| 167 | -TGAAIR---   | ----DTRKTL | PGLRALEKYA | VRCGGGSNHR  | MSLTDAALIK  | DNHV-----   |
| 168 | -TGAVIR---   | ----DTRKTT | PGLRMLEKYA | VRCGGGENHR  | MSLADAALIK  | DNHI-----   |
| 169 | YERTRIV---   | ----DTRKTT | PGLRPFKEYG | VVCGGGHNHR  | YGLSDAVMMK  | DNHL-----   |
| 170 | ----GAR---   | --IADTRKTT | PGLRALEKAA | VRAGGGVNHR  | SGLDDGVLIK  | DNHL-----   |
| 171 | -KNILLL---   | ----DTRKTT | PNMRIFEKYS | VRVGGGYNHR  | YNLSDAIMLK  | DNHI-----   |
| 172 | -HDARLV---   | ----DTRKTT | PGWRRLEKYA | VRCGGGHNHR  | TGLYDGFLLIK | DNHL-----   |
| 173 | --GLMIL---   | ----DTRKTL | PGYRKLAKYA | VYCGGGSNHR  | LNLSEMAMIK  | DNHL-----   |
| 174 | -YPTRFV---   | ----DTRKTT | PGLRVLEKYA | SRLGGAMNHR  | LGLDDAVMVK  | DNHI-----   |
| 175 | -TGVRLA---   | ----DTRKTT | PGLRLLEKYA | VRCGGGINHR  | MGLDDAAMLK  | ENHI-----   |
| 176 | -LPTQFV---   | ----DTRKTT | PGLRLLEKYA | TRVGGGTNHR  | LGLDDAVMVK  | DNHI-----   |
| 177 | -TGVRLA---   | ----DTRKTT | PGLRLFKEYA | VRCGGGINHR  | MGLDDAAMLK  | ENHL-----   |
| 178 | -TGVVALA---  | ----DTRKTT | PGLRGLEKYA | VRCGGGINHR  | MGLDDAAMLK  | ENHL-----   |
| 179 | ----STQ---   | --LLDTRKTT | PGLRALEKYA | VRVGGGKNHR  | FGLFDGILLIK | ENHI-----   |
| 180 | ----STQ---   | --LLDTRKTT | PGLRALEKYA | VRVGGGKNHR  | FGLFDGILLIK | ENHI IATQRC |
| 181 | -LPTQLV---   | ----DTRKTT | PGLRLLEKYA | VAVGGGVNHR  | FGLDDAILIK  | DNHI-----   |
| 182 | -HHARLV---   | ----DTRKTT | PGLRLIEKYA | VRVGGALNHR  | FGLDDAAMIK  | DNHI-----   |
| 183 | -LPARLV---   | ----DTRKTT | PGLRLLEKYA | TAVGGATNHR  | MGLDDAVMIK  | DNHI-----   |
| 184 | -TGILLA---   | ----DTRKTT | PGLRQLEKYA | VRCGGGINHR  | LGLDDAAMLK  | ENHI-----   |
| 185 | -TNINLA---   | ----DTRKTT | PGLRIFEKYA | FKCGGGINHR  | MGLYDAAMIK  | ENHI-----   |
| 186 | -SSVRLA---   | ----DTRKTT | PGLRVLEKYA | VRCGGGVNHR  | CGLDDAAMLK  | ENHL-----   |
| 187 | -SKVKLA---   | ----DTRKTT | PGIRVFEKYA | FHCGGGINHR  | LGLDDAAMLK  | ENHI-----   |
| 188 | -TNIKLA---   | ----DTRKTT | PGLRIFEKYA | FKCGGGVNHR  | MGLYDAAMIK  | ENHI-----   |
| 189 | -TNIKLA---   | ----DTRKTT | PGLRIFEKYA | FKCGGGINHR  | MGLYDAAMIK  | ENHI-----   |
| 190 | -LNVQLV---   | ----DTRKTT | PGLRILEKYA | TQVGGAKNHR  | MGLDDGVMIK  | DNHI-----   |
| 191 | ---TKTR---   | --VLDTRKTT | PGLRMLEKAA | VKIGGGVNHR  | IGLFDMILLK  | DNHV-----   |
| 192 | ---TAVR---   | --LLDTRKTA | PGMRITDKMA | VRHGGGHNHR  | MGLYDMIMLK  | DNHI-----   |
| 193 | ---EAD---    | --ILDTRKTL | PGHRRPDKYA | VRHGGGRNHR  | MGLYDMVLIK  | DNHI-----   |
| 194 | ---TKAK---   | --VLDTRKTT | PNFRMLEKWA | VKIGGGVNHR  | YGLFDMILLK  | DNHV-----   |
| 195 | ---TKTK---   | --ILDTRKTT | PGIRAIEKWA | VKIGGGENHR  | FALYDMIMLK  | DNHI-----   |
| 196 | ----NAS---   | --ILDTRKTA | PALRYDKEA  | VRIGGGTNHR  | FGLFDMILLIK | DNHI-----   |
| 197 | ----NAR---   | --ILDTRKTV | PGMRSFDKEA | VRIGGGYNHR  | TGLFDMMLIK  | DNHI-----   |
| 198 | --AVSVV---   | ----TRKSF  | PGTKKVAIKA | IMAGGAMPHR  | LGLSESLVF   | RHHT-----   |
| 199 | ----KAS---   | --ILDTRKTA | PGLRYFDKEA | VRIGGGRNHR  | FGLFDMMLIK  | DNHI-----   |
| 200 | ----EAR---   | --ILDTRKTA | PGLRYFDKEA | VRIGGGRNHR  | FGLFDLILIK  | DNHI-----   |
| 201 | ---LNVS---   | --LADTRKTI | PGMRMLEKYA | VYAAGGKSNR  | PDLACGVLIK  | DNHL-----   |
| 202 | ---HAR---    | --LLDTRKTT | PLWRDLEKEA | VRQGGGTNHR  | AGLDDGILLIK | DNHV-----   |
| 203 | ----KAQ---   | --ILDTRKTT | PGLRALEKYA | VRVGGGRNHR  | YGLFDGILLIK | ENHV-----   |
| 204 | -TNVKIL---   | ----DTRKTT | PGFRYFEKYA | VRIGGGTNHR  | FGLYDMVLIK  | DNHK-----   |
| 205 | -----IAATRIL | -----      | PGLGVLQKIA | VHGGGDPHR   | LDLSGCVMIK  | DNHL-----   |
| 206 | -KTVKIA---   | ----ATRKTH | PLLSMIEKYA | VFVGGGDTHR  | FRLDDMVMIK  | DNHI-----   |
| 207 | ---TRVAC---  | ----TRKTT  | PGIRKFEKLA | VAAGGGDTHR  | FNLSDAVMIK  | DNHI-----   |
| 208 | --DIIIA---   | ----TSRKTH | PGSRIFEIKA | VRAGGGDIHR  | NSLSDSIQFS  | QNHL-----   |
| 209 | ---TRVAC---  | ----TRKTT  | PGIRKFEKLA | VAAGGGDTHR  | FNLSDSVMIK  | DNHL-----   |
| 210 | ---VRVAC---  | ----TRKTT  | PGIRKFEKLA | VAAGGGDTHR  | FNLSDAVMIK  | DNHV-----   |
| 211 | --DIMIA---   | ----TSRKTH | PGFRKYELRS | VHAGGGDHR   | NSLSDSILIT  | QNHF-----   |
| 212 | ---VKVAG---  | ----TRKTT  | PGIRKFEKLA | IIAGGGDPHR  | FDLSDTIMIK  | DNHV-----   |
| 213 | ---VRVAC---  | ----TRKTT  | PGFRYFEKKA | VLIAGGGDTHR | FNLSGAVMIK  | DNHI-----   |
| 214 | ---CRIAA---  | ----TRKTA  | PGLRLMDKKA | AMIGGADPHR  | FSLSDAVLIK  | DNHR-----   |
| 215 | ---VRVAA---  | ----TRKTA  | PGLRMLDKKA | VVLGGGDPHR  | YCLSDMVLIK  | DNHL-----   |
| 216 | ---IRVAC---  | ----TRKTT  | PGLQKLEKKA | VEIAGGGDTHR | FKLDDCVLIK  | DNHI-----   |
| 217 | ---VIVAA---  | ----TRKVH  | PITGFLEKKA | VSDGGGLDHR  | FGLDDAVLIK  | DNHL-----   |
| 218 | ---VAIAG---  | ----TRKTT  | PGLRGVEKRA | VVAGGGDTHR  | LDLSHMVMVK  | DNHV-----   |
| 219 | ---SRIAG---  | ----TRKTT  | PGLRGVEKRA | VAAGGGDTHR  | LNLSHMVMVK  | DNHI-----   |
| 220 | ---VAIAG---  | ----TRKTT  | PGLRGVEKRA | IAAGGGDTHR  | LDLSHMVMVK  | DNHI-----   |
| 221 | ---VKVAG---  | ----TRKSL  | --LRLIDKRA | IMIGGEPHR   | FSLSDAILIK  | DNHL-----   |
| 222 | ---VKVAG---  | ----TRKSL  | --LRLIDKKA | IMIGGEPHR   | FSLSDAILIK  | DNHL-----   |
| 223 | ---VKIAG---  | ----TRKSL  | --LRLLDKKA | IMIGGEPHR   | FSLSDAILIK  | DNHL-----   |
| 224 | ---VRVAG---  | ----TRKTL  | --LKPDKRA  | LLIGGGETHR  | FSLSDAILIK  | DNHL-----   |
| 225 | ---VRIAA---  | ----TRKTP  | PGLRYFAKCA | VAVGGGDTHR  | LSLSDAVLVK  | DNHV-----   |



```

226 ---VRIAG-- ----TRKTT PGFRLFKEYA IEVGGGDPHR YNLSDAVLIK DNHI-----
227 ---VRIAG-- ----TRKTT PGLRVFEKYA IEVGGGDPHR YNLSDAVLIK DNHI-----
228 ---VIAG-- ----TRKTT PGLRIFEKYA IEIGGGDPHR YSLYDMVLIK DNHI-----
229 ---VIVAA-- ----TRKTL PFLRYIEKKA VWIGGGDPHR FSLSDSTLFK DNHR-----
230 ---RVVVA-- ----ATKTP PGLRALYHKA VLAGGGMVHR CCLSDGVLVF RNHL-----
      : **      .      .      *      *

```

```

      ....|....| ....|....| ....|....| ....|....| ....|....| ....|....|
1  --IASGS--- ----- VRQAVEKAFW LHPDV----- PVEVEVEN-- LDELDDALKA
2  --IASGS--- ----- VRQAVEKASW LHPDA----- PVEVEVEN-- LEELDEALKA
3  --AAG---- -S----- VVDALRAVRN AAPDLP----- -CEVEVDS-- LEQLDAVLPE
4  --AAG---- -S----- VVDALRAVRA AAPELP----- -CEVEVDS-- LEQLDAMLAE
5  --VAAG---- -S----- VVDALRAVRD AAPELP----- -CEVEVDS-- LEQLDEVLPE
6  --AAAG---- -S----- VVAALRAVRA AAPGLP----- -CEVEVDS-- LEQLDEVLAE
7  --AAAG---- -S----- VVAALKAVRE EAPGLP----- -CEVEVDS-- LEQLDEVLAL
8  --AAAG---- -S----- VVAALRQVRS AAPDLP----- -CEVEVDS-- LEQLDEVLAE
9  --VAAG---- -G----- VEKAVRAARQ AADFALK--- -VEVECSS-- LQEAQVAAEA
10 --IAAGS--- -S----- IKEAVAKAFW IHADV----- PIEVEVES-- LDELQQALEA
11 --VAAG---- -S----- MERAVLKARQ AAGFSLK--- -VEVECSS-- LEEAFRAAEA
12 --LAAG---- -G----- VEKAVQAARQ VADFTLK--- -VEVECSS-- LQEAVEAAKA
13 --WAMG---- -G----- VKEALDGVRA LAGKTLK--- -VEVECRS-- LEEALDAAAA
14 --SAAG---- -G----- IVNAVKSUDE YLKQKNL-EM DVEVETRT-- LEEVKEVLEY
15 --SVAG---- -G----- ITNAMKFVDR FLAKEKL-AL PVEVETRT-- LQEVKDLLEY
16 --ACIGLELQ RAPDD--PIV IQEAVRRARN CAGFSVS--- -VEVECGS-- EASALAAITA
17 --WATG---- -S----- ITNAVKNARA VCGFAVK--- -IEVECLS-- EDEATEAIEA
18 --WATG---- -S----- ITRAVQDARA ACCFTIK--- -IEVECS-- EAKADKAIAA
19 --TSTG---- -S----- ITKAVKKAKS VCGFAVK--- -VEVEVSN-- EKDAEEAIEA
20 --WATG---- -S----- ITSAIQTVRR VAGFSL--- -VNVECON-- FKEADEAVTA
21 --WACG---- -N----- ITNTVKNARS VGGFSLK--- -IEVECRN-- QNEAIEAIEA
22 --IASGS--- -S----- VRQAVEKASW LHPDA----- PVEVEVEN-- LEELDEALKA
23 --IAAGS--- -S----- IKNAVEKAQS LRGDV----- PVEVEVES-- LDELQQALEA
24 --IANGS--- -S----- IKQAVDKARY SHPDV----- PVEVEVET-- LDELILALKA
25 --EYIGS--- -S----- IKKIINMTRL YFPKS----- KLEIEVRN-- IKELKEAITS
26 --IAAGS--- -S----- IANAVTNAVA LRADV----- PVEVEVES-- LDELHQALDA
27 --AIAGS--- -S----- VREALRHAKA MAGHLVN--- -IEIEVDT-- LEQLHEAMEI
28 --RAAGS--- -S----- LSAAVHAARV QQPQ-----L PLVVEVET-- LEQLREALQV
29 --RAAGS--- -S----- LSAAVHAARA QQPQ-----L PLVVEVET-- LEQLHEALQV
30 --IACGG--- -S----- IRQAI STAKQ LNPBK----- PVEVETET-- LAELEEAISA
31 --IACGG--- -S----- ITQAVTKAKE LQPGK----- PVEVETEN-- LDELREAINA
32 --AACGG--- -S----- IDRAIAEARR IAPGK----- PVEVEVEN-- LDELQQALEA
33 --AASGG--- -S----- VAEAVAAAHR IAPGK----- PVEIEVES-- LDELQQAALAA
34 --AACGG--- -S----- IAQAVTAHR IAPGK----- PVEVEVES-- LGELKQALDA
35 --AIAGD--- -S----- IKTAIEQAQQ FAGHLIP--- -IEIEVDT-- LAQLEQALDA
36 --MAAGG--- -S----- IAQAI EKAHQ IAPGK----- PVEVEVET-- WDELQQAALQ
37 --MACGG--- -S----- IAEAIQAARA LHNDK----- PVEVEVES-- LDELKAALDG
38 --MACGG--- -S----- ISKAITAARA LDSNK----- PVEVEVES-- LEELTQALDG
39 --MACGG--- -S----- IKAIDKART LHPDK----- PVEVEVES-- LAELTEALQA
40 --MACGG--- -S----- IRQAVDTARS LYPNK----- PVEVEVES-- LEELALALDS
41 --MASGS--- -S----- IASAINAARQ LASDK----- LVEVEVES-- IDELQQAALDA
42 --FACGG--- -S----- ITQAVATAKR LNPBK----- TVEVEVEN-- LDEFQQAALKA
43 --AACGG--- -S----- ISQAVATAKS NHSDK----- TVEVEVES-- LDELEQALNA
44 --AACGG--- -S----- INKAVQAQKQ NQPNK----- PIEVEVES-- LVDLKQALDA
45 --LACGS--- -S----- IANAIGKARE MHPDI----- PVEVEVEN-- LEELKQALDA
46 --AACGG--- -S----- ITAAVEKARE IAPDK----- RVEVEVET-- REELLEAIAA
47 --MACGG--- -S----- IEASVKMAKK QHPER----- LVEVEVES-- IAELKEALNA
48 --AACGS--- -S----- IANAVAEHR IAPGK----- PVEVETES-- LAELDQALEA
49 --LSCGS--- -S----- LTQAIQKARA SHPEK----- TLEIEVEN-- LNELQEALAA
50 --KACGS--- -S----- VAHAISLARK TDKHL----- LVEIEVET-- LEELQEALDA
51 --AAAGS--- -S----- IGEAVATARR LHPG-----V LVEVEVEN-- FPELEQALAA
52 --RSAGG--- -S----- IAKAVTKAKK LDSNK----- VVEVEVTN-- LDELNQAIAA
53 --LAAGS--- -S----- ITAAIARARI ANSNL----- PVEIEVEN-- LNELQQAALAA
54 --LACGS--- -S----- IAAVAAAARE RAPE-----L PVEVEVET-- LQLEQQAALAA
55 --AACGG--- -S----- LTPAVEVARL RAAG-----T PITVEIED-- LVQLDEAIAA
56 --MACGS--- -S----- IHNAVEEAHR IAPGK----- PVEVEVET-- MEQLQEALSA
57 --AACGG--- -S----- IAEAVTAARR IASDL----- PVEVEVES-- LDELDAALEA
58 --AACGG--- -S----- ITAAIKRARA LAPEK----- KIVEVET-- LAELEEAACL
59 --LACGG--- -S----- IAEAI SEARR LNPBK----- PVEVEVES-- LVELEQALAA
60 --LAAGS--- -S----- IANAVSNALI LRKDL----- IVEVEVEN-- LQELKQALKA
61 --AYCGS--- -S----- IAQAVRQAKQ AVGPLTC--- -VEIEVDT-- LAQLDEAIAA
62 --MAAGG--- -S----- VAQAMEQALA DLPPG-----V TLQIEVEN-- LAQLEEALNH
63 --AAAGG--- -S----- VTAALRAAQA LNAG-----V PIQVEVET-- LAELEEALAA
64 --AAAGS--- -S----- ITAAMQAALA LGAN-----A SIQIEVES-- LAELEEALAA
65 --AVCGS--- -S----- IAAAVARVRR KLPVLT--- -LEVECDR-- LDQVREALDA
66 --AAAGG--- -S----- VGEALDAAFA LNAD-----V PVQIEVET-- LDQLRTALAH
67 --AAAGG--- -S----- VGEALDAAFA LNAG-----V PIQVEVET-- LEELEIALAH
68 --AAAGG--- -S----- VGEALDAAFA LESG-----V PVQVEVET-- LAQLDTALAH
69 --AIAGG--- -S----- IDAAVQRARA AIGHMVK--- -IEVEVDT-- LEQLRVLRRL
70 --AAAGG--- -S----- VAKVLRRAAV LAPEA---K FVEIEVET-- LAQLKEALDA
71 --AAAGG--- -S----- IAQVLAARAAA VAAQA---D FVQIEVED-- LAELQQAALNA
72 --AAAGG--- -S----- IRQVLAQAAK IAAEA---D FVEIEVET-- LEQLHEALDA
73 --AAAGG--- -S----- LTIAFRAAQK MVDQV---D FIQVEVET-- LDQLEEALEA

```

74 --AAAGG--- ----- VTAVLHAARA AAAQA---K FIEIECET-- LEQLDEALSA  
75 --AAAGG--- ----- VTAVLRAAQA VAAQA---A FIEIEVET-- LAQLQEALDA  
76 --AAAGG--- ----- IAQVLAARE LDAG----V DIQIEVET-- LAQLREALDH  
77 --IAAGS--- ----- IEAALRKAIE IAPP----EV FIQIEVET-- QGELMQALSA  
78 --MAAGG--- ----- IEPALRAARR IAAR----GI FIQIEVET-- LQDLRTALDA  
79 --IAAGG--- ----- IROVVEQARA IAFSN---V FIEVEVEN-- LDELREALDA  
80 --HAAGG--- ----- IAQAMAAAKQ VAEQAKGRCK FIQIEVES-- IDELNQALTA  
81 --LAAGG--- ----- IKAVLDAAFR LAEDQ---V SVQIEVET-- LDELQOALDA  
82 --AAAGS--- ----- IEAVLHHARA LNP----DV SIQIEVET-- LEQLQALNA  
83 --RHVK---- -----D LKSFLTHARK NLPFTAK--- -IEIECES-- FEEAKNAMNA  
84 --AYAG---- -----N LKELISTARE RLPFMCP--- -IEIECEN-- YKQAKEAIQA  
85 --RHID---- -----D LYAFIKEART RIPWTSR--- -IEVEVES-- VQRMIEACEA  
86 --KTIK---- -----D LKSYIQKARQ KIPFTAK--- -IEVEAET-- LEIAKEAFKA  
87 --MAAGS--- ----- ISQAVALARQ LHPNK---- TVEVETET-- LDEVKQAVDA  
88 --DAAGG--- ----- ITNAVTKIRQ KYGN----K FKQIEVETRS LNEVKEALNL  
89 --AAAGG--- ----- ITEAVRRARA YIPHTMK--- -IEVETEC-- LEEVAEALEA  
90 --AAAGG--- ----- ISRAVSRARS YIPHTLK--- -IEVETES-- IAEVTEALEA  
91 --AAAGG--- ----- IAVAVARARE TAPHTLR--- -IEVETRN-- LEEVKEALVA  
92 --AAAGG--- ----- IGEAISRARA YIPHTLK--- -IEIETET-- LAQVEEALTA  
93 --DAAG---- -----S ITAAVTRLRT AYAP----CP PIEVECRT-- MEEVVAEAVAC  
94 --DLAG---- -----S ITAAVQRLRD TYSP----CP PVEVECRT-- PDDVCEAVAC  
95 --SVMG---- -----G ITNAINRVR- EHSN----L PIEVEAGT-- VEDVKEAVAM  
96 --AACGS--- ----- LTAAYERARL AIPHTIK--- -IEVETDT-- LPQVEECVAC  
97 --AACGG--- ----- VAEAVRRARA S---AGA-ML RVEVEVED-- LPGLDEAIAA  
98 --AAVGG--- ----- IAEALRRAKL N---GPR-LT KVEIEVIN-- LKQLEAIEH  
99 --EAAG--- ----- IGTAVARVR- --QRASH-TL KIEVEVKN-- FQELNEAIOA  
100 --AAVGG--- ----- VREAVRRARR S---APH-GL KIEVEVET-- LEQLEALQA  
101 --VCGGS--- ----- ITECVSRIRR KLGDV---- FITVECDN-- KLQVEESIKS  
102 --ASCSG--- ----- ISECVKHVAR KLGNV---- VILVECDT-- TEQVEESILN  
103 --ASCSG--- ----- ITLAIQRIKE NLKDE---- YIAVECDN-- ISQVEESILN  
104 --ASCSG--- ----- ITLAIQRLRM NLKNA---- YVAIECDN-- ISQIEESLSN  
105 --AICGG--- ----- ITAAVHKLKK SFEGI---- YITVECDT-- FDQVKESLSV  
106 --ASSDI--- ----- KTLVSLAIKN KKGR---- KITVEVDN-- LNQLKKIMGL  
107 --IALGS--- ----- ITLAVKLAIE QYPNL---- PLIVEVED-- LSQLEEVLLI  
108 --AIAGD--- ----- IRTAIERARR AIGHMVK--- -IEVEVDR-- LDQLEIALTA  
109 --AIAGG--- ----- IRAAIKRARA SAGHLVK--- -IEVEVDT-- LTQLEEALTL  
110 --AMAGG--- ----- IRPAIERTRA SVGHLIK--- -IEVEVDT-- LAQLEEALAL  
111 --AIAGG--- ----- IRPAIERARA HAGHMVK--- -IEVEVDT-- LAQLEEVLAR  
112 --AVSGG--- ----- VAGAVRAARA YCGHLVK--- -VEVEVDG-- LAQLEALTA  
113 --AVAGG--- ----- VREAIRRARH GVGHLVK--- -IEVEVDT-- LVQLHEAMEE  
114 --AISGG--- ----- VAEAIRRARH GVGHLVK--- -IEVEVDR-- LDQLQEAAMV  
115 --AVAGG--- ----- IRPVLERARA HAGHLIK--- -IEIEVDT-- LAQLREVLDL  
116 --AVAGG--- ----- IRPVLEAARA KIGHLVK--- -IEIEVDT-- IDQLREVLDL  
117 --AVAGG--- ----- VRPVLERARA RIGHLVK--- -VEIEVDT-- LDQLKEVLAS  
118 --GFL---- -----DEP LAATVERLRR AAPEKK--- -LVTEVSS-- IEAALAAAAE  
119 --GFLA---- -----DQA LPQIVERMRR GAPEKK--- -LVIEVTS-- VEAALAAAAE  
120 --AVAGG--- ----- VRPVLERARE RIGHLVK--- -IEIEVDT-- LDQLREVLDL  
121 --AIAGG--- ----- VTEALQRAK GVGHLVK--- -IELEVDT-- LDQLHEALDQ  
122 --AAAGG--- ----- IRPVLEATRA RASHMVK--- -VEIEVDR-- LDQLEEVLA  
123 --AAAGG--- ----- IRAVLDATKA HASHMMA--- -VEIEVDT-- LDQLREVLEV  
124 --PFA---- -----AGD LRAQLARLRA ACPEKH--- -LVVEVTS-- LAAAEAAAEAG  
125 --AVAGS--- ----- IAAAVQRAKA KAPMLTK--- -IEVEADR-- LDQVREALDA  
126 --AAAGG--- ----- IRPVLQAIKA RASHMMR--- -VEIEVDR-- LDQLAEVLEE  
127 --AVCGGV-- ----- -REAVEAARK SAGHMTR--- -IAVEVDR-- LSQLDAAIDA  
128 --AACGGS-- ----- IEATLERAKA YAGHLRM--- -IEIEVDT-- LAQLEEALKY  
129 --AVAGS--- ----- VALAVRRAVE AA--IPY--- -IIVEIDT-- LEQIPEALAE  
130 --LVAGG--- ----- VAEAVRRALS AG--VRD--- -VICEVDH-- IDQIEPALAA  
131 --AVAGS--- ----- VEAVRRAVE AG--IAD--- -IIVEVDR-- VAQVEPALVA  
132 --LVAGN--- ----- VGEAVRRAVA AG--VEE--- -ICEVDR-- LDQIEPALRA  
133 --AIAGG--- ----- VATAIKRARS SIGHLVK--- -IEVEVDT-- LTQLHQVLEY  
134 --AVAGG--- ----- VSAALSRARA GVGHMVR--- -IEIEVDT-- LEQLAEVLAV  
135 --ALLD---- -----DGS MADSVRRLKQ SCPEKK--- -IVVEVTS-- AEEAEAAALA  
136 --AVCGG--- ----- VGEAVRRAKA EG--RPN--- -IEAECDT-- LEQVAEAVEA  
137 --AMAGS--- ----- IREAVAAMHS SLTHLH--- -RIEVECT-- LDQVVEALEA  
138 --ALAGS--- ----- AVEALDRAT --RNRG-EQ PIEIEVRS-- LEELEQVLEK  
139 --SAAGG--- ----- VRPALERAAQ S---G---L PVEIEVRT-- RAELGEALSS  
140 --AACG--- -----S ILEACKKARQ AAGHMVN--- -IEVEIET-- EEQLREAIATA  
141 --AQAK---- -----G IRQAVTQARS VIGHSLK--- -IEVEVEN-- REQLEEAVDA  
142 --AFAG---- -----S ITKAVTSVKE KLGHMVK--- -VEVETET-- EEQVREAVAA  
143 --AACG---- -----S ISKAVEKARS ACGHMVK--- -IEVEIES-- EQELHEAIEA  
144 --AAST---- -----S IAAAIEKARA YAGPMAK--- -IEVETTT-- LDEVKEAVAA  
145 --AFCG---- -----S IARAVKTVRE RLGHMVK--- -IEVETET-- EDEVLEAVEA  
146 --AFSG---- -----G ITSAVSTVRG KLGHMVK--- -IEVETET-- AEQVKEAVQA  
147 --AAVG---- -----S VQKAIQAQARA YAPFVKM--- -VEVEVES-- LAAAEAAALAA  
148 --DAAY---- -----G ITNAVNLARN NSSFVRK--- -IEVETET-- LDEVSEALNA  
149 --EAAG---- -----G IKNVAVSLARK NSPFVRK--- -IEVEVES-- IEQLKEALET  
150 --DAAG---- -----G IKKAIELVRN SVSFVRK--- -IEVEVEN-- LTGVQKALEA  
151 --KAAG---- -----G IKQAVQLVRE KIPHTMK--- -IEVETET-- IEQVLEALEA  
152 --KAAG---- -----G IEAAIKRARK YAPHTLK--- -IEIEVES-- LEGLKEAIAA  
153 --QAVG---- -----G IQKAVSTLRQ KVPHTLK--- -IEVEVEN-- LQQLQEALEA  
154 --AATASQ-- -----GLS ITEALSNMKA KLPHTTH--- -VEVEVDH-- IEQIEPVLAA  
155 --ASVLAS-- -----GMT ITEALLQMKR RLPHTTH--- -VEVEVDR-- LDQIEPVLAA  
156 --AYR---- -----G IKDCVSIIRK AHPHIS--- -IEVECDT-- LTQVAEALDS

```

157 --ELS-----N AAEAYARVRE FLGEDAT-- WVEVEVDT-- LDQLSDLLAE
158 --AAAG-----S VVEALRAVRA LAPDIA---- -CEVEVDS-- LEQLDAVLAE
159 --AAAG-----S VVAALRAVRA AAPDIE---- -CEVEVDS-- LEQLDEVLAE
160 --MAAG-----G VAQAFRAVGE MFPDVP---- -IEVEVDT-- LHQLREVVDVA
161 --AVLTAQS-----GLS VTAALKKVRRL ELSHHTH--- -LEVEVDR-- LDQIEPVLAA
162 --AVITGGD-----PAK LTAVLKKAARA RLGHHTH--- -FEVEVDR-- MEQVEPVLAA
163 --AVMTGGD-----SSK LTELLIAAKA QLGHTTH--- -FEVEVDR-- AEQIEPVLAA
164 --VAAG-----G VVPAYDAVRR AYPDLR---- -VEVEVTG-- LDELRELLDA
165 --AAAG-----G VAEAVRAVRE RFPDIP---- -LEVEVDR-- IDQIEPALAA
166 --VAAG-----G VAAFAAVRA RFPGLP---- -VEVECDT-- VDQVAEAVDA
167 --VAAG-----G VAAFAAVRD RFPGLP---- -VEVECDT-- VDQVAEAVAA
168 --MAAG-----G ISEAFARVRA MFPFVP---- -VEVECDT-- LPQVAEAVRA
169 --AALAAR-----GID LAGAIRHVRE QVGHTTH--- -IEVEVDR-- LDQIPAVIAG
170 --ALAGG-----S VAEAVRRARA A---APH-LL RVEVEVES-- ERELREALAA
171 --DAAG-----S ITEAIKLAKA YSPFIKK--- -IEIEVED-- LKGVEEAVKA
172 --ALGRSEHD PSSKLTAGEA ATRAVAMRGA SVNQLVAP-P MVEIEVDT-- LEQFEQVATT
173 --AMYSS-----S AREPVEKIKL SFPNK----- LVEVEIDS-- ILQLEDIAISS
174 --QAAG-----S ITKAVQTLRQ NLPYPLA--- -IEVETSN-- LEEVQEAIAI
175 --AWAG-----G ITMAIAAVRE QAPWPTA--- -VIVEAET-- EAQALEAVRA
176 --AAAGG-----S IAAAIKKLRS QLPFPLI--- -IEVETET-- LGQVMEAIISA
177 --AWAG-----G ITAAIDVVRH QAPWPCR--- -VIVEAET-- GDQACEAVQA
178 --AWAG-----G VTAIAAVRA DAPWPAR--- -VIVEAET-- SEEAQAAVAA
179 --RGAGG-----S ILAAVQRAK --AGAPH-HL KVEVEVRN-- LQEELEALAA
180 CDRGAGG-----S VLAAVKRAK --EGAPH-HL KVEVEVRD-- LQEELEALAA
181 --VAAG-----G ITAAVEKVRQ ASFFPLA--- -IEVETET-- LEQVREALFL
182 --EAAG-----G IRPAVERLRG RIPFLMP--- -IEVETES-- LEQVQEAALGC
183 --AAAG-----G IGEAITRIRA QIPYTLT--- -IEVETET-- IEQVKEALEY
184 --AWSH-----G IKQSIHTLRS NIPWTTK--- -IIVEAET-- TQEAKEAVSA
185 --AWTD-----N LKNAVEKIRL NTPFTTH--- -IIIEAED-- MKQAKDAVLA
186 --AWAG-----S MAAAVAVRT SAPWPAQ--- -VIVEAET-- ADQAAEAIRA
187 --EWSQ-----G ISESIKILKN TIPWTKK--- -IIVEAET-- PSQAKEAVKA
188 --AWTD-----N LNNAVKKIRL NSPFTTH--- -IIIEAEN-- IEQAKEAVLA
189 --AWTD-----N LNNAVKKIRL NTPFTTH--- -IIIEAEN-- MKQAKDAVLA
190 --AAAG-----G IGEAIAKVRE RIPYPLT--- -IEVETET-- LVEVERALEH
191 --DFAG-----G IDKAINRAKE YCKEKGK-DL KIEIEVRN-- FDELQRVLSI
192 --KVAG-----G IPQAI EAARR ALP---L-SI KLEVETSN-- LAEVEEAVRY
193 --DGAGG-----S IPEAVRRAR --DAHGD-DY PIEVEVKT-- LDELDEALAL
194 --DFSG-----G VAQALKNSKA YVAKTGR-DL KIEIETRN-- LSEVKEALRE
195 --DFAG-----G ITKAIDTKT YLKEKNL-DL KIIIVEARN-- IQEIKEILRS
196 --DAAGS-----S VEEAIRRAKA YCQEQGV-SA KIETEVRN-- ISELVRACAS
197 --DAAGG-----S VVEALERAKR YRQEQQL-EV LIETEVRN-- LAELQEVLPV
198 --AFQGG-----LES FLETLSLQKQ RAPENR---- -VIVEADT-- AKEALQIAAA
199 --DASGG-----S VANALRKARQ YRKKHGL-AV KIETEVRN-- IDELREALSC
200 --DAAGG-----S VGPALNRARM YREKHGL-DV KIEAEVRS-- LDELSAALAC
201 --MALSAGI-----G IKEAIEKAKT NKSK-----L PVIVEVNT-- LEQVAQAI EA
202 --AAAGS-----S IGAAIERARN ---ASY-LL KVECEVPD-- LTGLEEALRA
203 --RAAGG-----S VGEAVRRAK --ARAPH-YL KVEVEVRD-- LAELEEALEA
204 --RVAG-----S IKEAVKRVRE RISPVYK--- -IEVEVEN-- LEEVEEALSA
205 --KMYG-----S AERAVQEVVK IIPFTTK--- -IEVEVEN-- LEDALRAVEA
206 --QAVG-----S IEECFKRAEK LSFSSK--- -IEVEVDT-- LDQLKEVIEY
207 -----K LMG-IETAIK AARKSS-FTR KIEVEVES-- AEDAVLAACKL
208 -----S ELGK LRAIKK---- -IEIEPRT-- REEAFKYAGM
209 -----K LMG-IEAAIK AAKKTS-FTR KIEVEIES-- VEYAVLAAEL
210 -----K LMG-IEAAIK EARKTS-FTR KIEVEVES-- AEDAVFAAEL
211 -----S SFDK LRAMRK---- -IEIEPRT-- KEEVFQYAPI
212 -----N MMG-LENAIN SAKELAGFTQ KIDVEVES-- VENAIIAAKM
213 -----A IMG-LEDAIK EARKRASFTK MIEVEVED-- LDTMIRAAEL
214 -----V LT-VVDEAVR RAKA-FSAYH RVEAEADT-- IDEALRIAQA
215 -----A LV-PLPEAIR KAKE-RSRYR AVEVEVET-- ARDAVTAAVA
216 -----Q VVGGVIEAID RAKENVSTFK KIEIEVEN-- LDDAIRASMF
217 -----A LVGSVRDAVR RARERVGFTK VIGVEVES-- IEDAVEAAGA
218 -----A ELG-LEGAIE RFRAAKSFAT KLDVEVET-- PEDAPRAADA
219 -----A EMG-LVDAIE HFHERVSFAT KLDVEVEA-- PEDAPRAAEA
220 -----A EMG-VETAIE RFREQASFAT QIEAEAET-- AEMAVAAAAEA
221 -----A LV-PLEEAIK RAKE-FSVYK VVEVEVEN-- LEDAVKAAGA
222 -----A LV-PLEEAIK RAKE-FSMYK VVEVEVES-- LEDAIKAAGA
223 -----A LV-PLEEAIK RAKE-FSVYK VVEVEVES-- LEDAIKAAGA
224 -----A LV-PLEEAIK RAKE-FSVYK VVEVEVES-- LEDALKAARA
225 -----R IAGSVAEAVR RAKARTSFAT RVEVEVSS-- LEEAVEAIEA
226 -----T LYGNLEELIK RVKFSVSFTK IIEVEVSS-- YEDAIRAFKA
227 -----A LIGSVKEAIR RAKEITSFTK KIEVEVSS-- LKDALEAYQA
228 -----S IIGNVKDAIK QAKEITSFSK KIEVEVSN-- INDAIEAYKA
229 -----K FI-PLHMAS SKRP---FVH KAEVEVNT-- AEDAVRAAEM
230 --VFLG-----S -EGALQKAAK AAAYRP---- -AGVEVST-- VEEAVEAAGA

```

\*

```

.....|.....| .....|.....| .....|.....| .....|.....| .....|.....|
228 232 243 249
1 G-----ADI IMLDNFNNTD-----QM REAVKR----- VNGQARLEVS
2 G-----ADI IMLDNFETE-----QM REAVKR----- TNGKALLEVS
3 KPE-----L ILLDNFAVW-----QT QTAVQRRD-----S RAPVMLESS
4 EPE-----L ILLDNFPVW-----QT QVAVQRRD-----I RAPVLLLESS
5 KPE-----L VLLDNFPVW-----QT QMAVQRRD-----A RAPAVLLLESS

```

|    |            |                |            |             |             |               |
|----|------------|----------------|------------|-------------|-------------|---------------|
| 6  | DIE-----L  | VLLDNFPVW----- | QT         | QIAVQRRD--  | -----S      | RSPATKLESS    |
| 7  | GVE-----L  | VLLDNFPVW----- | QT         | QMAVQRRD--  | -----A      | RAPETLLESS    |
| 8  | DVE-----L  | VLLDNFPVW----- | QT         | QIAVQRRD--  | -----A      | RSPKTKLESS    |
| 9  | G-----ADL  | VLLDNFKPE----- | EL         | HPTATVLKAQ  | FPSVA-----  | -----VEAS     |
| 10 | G-----ADI  | VMLDNFTIP----- | MM         | RDAVKMRDDH  | AK-----     | TQGSQAQLEVS   |
| 11 | G-----ADL  | VMLDNFKPE----- | EL         | HPTAATLKAR  | FPSVS-----  | -----VEAS     |
| 12 | G-----ADL  | VLLDNFRPE----- | EL         | HPTAAALKAQ  | FPGVG-----  | -----VEAS     |
| 13 | G-----ADI  | VMLDNLTP-----  | SL         | HAVALAVKSS  | YPSV-----   | -----IEAS     |
| 14 | ASGSETRLTR | IMLDNMVVPL     | ENGDVDVTML | KDAVELING-  | -----       | ---RFETEAS    |
| 15 | AAENNTSLTR | IMLDNMVVPL     | GNGDIDVSML | KDAVELING-  | -----       | ---RFETEAS    |
| 16 | G-----ADV  | IMLDNMDPE----- | TF         | CETAKRLREK  | TATMPH----- | ---CRYLIEAS   |
| 17 | G-----ADV  | IMLDNFKGD----- | GL         | KMCAQSLKNK  | WNGK-----   | ---KHFLLLECS  |
| 18 | G-----ADV  | IMLDNFAGT----- | SL         | RATAQRLKER  | WAGK-----   | ---KNFLLLECS  |
| 19 | G-----ADV  | IMLDNFKGE----- | EL         | RQVAQSLKKK  | FAGTN-----  | ---KSFLLLECS  |
| 20 | G-----ANI  | VMLDNMVG-----  | DL         | HSAARLKEK   | WQQG-----   | ---REFLIETS   |
| 21 | G-----ADI  | VMLDNFNPO----- | DL         | QTVSTYLKQH  | YPHIT-----  | -----LEAS     |
| 22 | G-----ADI  | IMLDNFETE----- | QM         | REAVKR----- | -----       | TNGKALLEVS    |
| 23 | G-----ADI  | IMLDNFSLD----- | NI         | REAVSL----- | -----       | TQGHALLEIS    |
| 24 | N-----VDI  | IMLDNFTIP----- | MM         | KEAVAI----- | -----       | TSQKVALEVS    |
| 25 | K-----ADL  | IMLDNFKYE----- | DV         | IKAVIINK--  | -----       | ---NQSILEAS   |
| 26 | G-----ADI  | IMLDNFSRE----- | DM         | VQAVAV----- | -----       | TRQRAALEVS    |
| 27 | G-----VDA  | VLLDNMQPS----- | EL         | REAVNIVAG-  | -----       | ---RAITEAS    |
| 28 | G-----CTR  | ILIDDFDPA----- | MR         | RAAVQIVAAL  | P-----      | PAQRIPLEVS    |
| 29 | G-----CTR  | ILIDDFDQA----- | MR         | REAVRIVAAL  | P-----      | LERRIPLEVS    |
| 30 | G-----ADI  | IMLDNFSLE----- | MM         | REAVKINAGR  | -----       | ---AALENS     |
| 31 | G-----ADI  | IMLDNFTTE----- | MM         | RQAVEINAGR  | -----       | ---AALENS     |
| 32 | G-----ADI  | VMLDELSLD----- | DM         | RTAVALTAGR  | -----       | ---AKLEAS     |
| 33 | G-----ADI  | IMLDELSLD----- | EM         | REAVRITAGK  | -----       | ---AKLEAS     |
| 34 | G-----ADI  | VMLDELSLD----- | DM         | REAVRLTAGR  | -----       | ---ALLEAS     |
| 35 | G-----VSL  | VLLDNMAPE----- | VL         | LQAVAMCQGR  | AKT-----    | -----EAS      |
| 36 | G-----ADI  | VMLDNFSQQ----- | QM         | IEAVKYVAGR  | -----       | ---CKLEAS     |
| 37 | G-----CDI  | IMLDNFDIT----- | MM         | LEAVAINNAY  | KE-----     | GGRGAKLEVS    |
| 38 | G-----ADI  | IMLDNFDVT----- | MM         | VDAVSLNRY   | KD-----     | QDKGAKLEVS    |
| 39 | G-----SDI  | IMLDNFDVT----- | MM         | IEAVAINDAF  | KV-----     | QGGGAKLEVS    |
| 40 | G-----TDI  | IMLDNFDIT----- | KM         | VEAVEMNNQY  | KA-----     | KGASAKLEVS    |
| 41 | G-----ADI  | VMLDNFDVT----- | MM         | IEAVELNNSY  | NE-----     | NQR-VKLEVS    |
| 42 | E-----ADV  | IMLDNFSIE----- | DI         | KQAVQQNRDN  | -----       | AGHSAQLEVS    |
| 43 | G-----ADI  | IMLDNFTPE----- | MI         | EQAVTATRG-  | -----       | ---KAKLEVS    |
| 44 | G-----ADI  | IMLDNFNVE----- | QI         | KQAVVVTNK-  | -----       | ---RAKLEVS    |
| 45 | K-----ADI  | IMLDNFSLO----- | DT         | RQAVALTQG-  | -----       | ---ASKLEVS    |
| 46 | R-----ADV  | VMLDNFDAD----- | SL         | QYAMNLDKHN  | T-----      | ---QYELS      |
| 47 | G-----AER  | IMLDNFSIA----- | MM         | LEAVALNSEN  | -----       | PNSTAKLEVS    |
| 48 | G-----ADI  | IMLDEFSLA----- | DM         | AEAVKRNAGK  | -----       | ---ARLEAS     |
| 49 | K-----ADI  | ILLDNFDID----- | TI         | KKAVKINNSQ  | -----       | ---AKLEIS     |
| 50 | H-----PDR  | ILLDNFTQD----- | ML         | EQAVKMNHPK  | Y-----      | ---CELEAS     |
| 51 | G-----ADR  | IMLDDFERD----- | AL         | SKAVAVAAG-  | -----       | ---RAELEVS    |
| 52 | K-----ADI  | VMLDNFSGE----- | DI         | DIAVSIARGK  | -----       | ---VALEVS     |
| 53 | G-----ADI  | LLLDNFDTP----- | SL         | REAVRISQQR  | -----       | ---AKLEAS     |
| 54 | E-----ADT  | IMLDNFSLA----- | DV         | ERAVALTAR-  | -----       | ---RSKLEAS    |
| 55 | G-----ADV  | VMLDNFDAD----- | GI         | RQAVDRAAG-  | -----       | ---RVALEVS    |
| 56 | G-----ADI  | VMLDNFSIE----- | QM         | AHAVVVNQGR  | -----       | ---AKLEAS     |
| 57 | G-----ADT  | IMLDNFALE----- | TL         | REAVARNAGR  | -----       | ---SRLEAS     |
| 58 | M-----PDQ  | IMLDNFSVE----- | ML         | AEAAGMAVES  | -----       | ---VLEVS      |
| 59 | G-----ADI  | VMLDNFDIP----- | MM         | REAVALNQSR  | -----       | ---AKLEVS     |
| 60 | K-----ANI  | IMLDNFNK-----  | NI         | LQAVNI----- | -----       | TSKQAALVEVS   |
| 61 | G-----AKR  | ILLDNMDDE----- | TL         | KEAANRCHTQ  | TSHP-----   | ---HTVYCEAS   |
| 62 | G-----ARL  | VLLDNMSLD----- | DM         | RRAVEICA--  | -----       | ---GRAELEAS   |
| 63 | G-----ATS  | VLLDNFDEP----- | AM         | HEAVRVTA--  | -----       | ---GRALLEVS   |
| 64 | G-----ATS  | ILIDNFTVP----- | MM         | HDAVRINA--  | -----       | ---GRALLEVS   |
| 65 | G-----VDV  | IMLDNMSLP----- | DM         | KEAVQIVNG-  | -----       | ---RTKVEAS    |
| 66 | G-----ARS  | VLLDNFTLD----- | MM         | RDAVRVTE--  | -----       | ---GRAVLEVS   |
| 67 | R-----AQS  | VLLDNFSFE----- | AM         | REAVRITA--  | -----       | ---GRAVLEVS   |
| 68 | R-----AQS  | VLLDNFTLD----- | MM         | REAVRVAA--  | -----       | ---DKAVLEVS   |
| 69 | G-----VDV  | VLLDNMDLD----- | TL         | REAVALVDG-  | -----       | ---RAVTEAS    |
| 70 | G-----AGM  | VLLDNMTLA----- | QL         | QEAVQLNA--  | -----       | ---GRAVLEVS   |
| 71 | G-----ARM  | VLLDNMTLD----- | QL         | REAVRINE--  | -----       | ---GRASLEIS   |
| 72 | G-----ARM  | VLLDNMDLP----- | TL         | HEAVRINA--  | -----       | ---GRAVLEIS   |
| 73 | G-----VTM  | VLLDNMPLG----- | RV         | RQAVEMAQ--  | -----       | ---GCCSLEMS   |
| 74 | G-----ARM  | VLLDNMPLP----- | ML         | HDAVRLNAAH  | P-----      | ---AGPAILEIS  |
| 75 | G-----ATM  | VLLDNMPLA----- | QL         | REAVRINAAH  | A-----      | ---GGGAILLEIS |
| 76 | G-----AVS  | VLLDNFDLP----- | QM         | REAVAVNA--  | -----       | ---GRALLEVS   |
| 77 | G-----ARM  | VLLDNFDLP----- | AL         | RDAVAFNRQF  | P-----      | ---GGPAVLEAS  |
| 78 | G-----ATL  | ILLDNFDLE----- | EL         | REAVVLNARL  | T-----      | ---NKGAVLEAS  |
| 79 | G-----VTM  | VLLDNMSLE----- | EM         | REAVRITA--  | -----       | ---GRAELEAS   |
| 80 | G-----ATM  | ILLDNFSLD----- | MM         | REAAQINA--  | -----       | ---GRAILEAS   |
| 81 | Q-----APS  | ILLDNFELA----- | AM         | RRAVELTA--  | -----       | ---GRALLEAS   |
| 82 | G-----ATL  | VLLDNFAPP----- | ML         | VEAVRINQ--  | -----       | ---GRAILEAS   |
| 83 | G-----ADI  | VMCDNLSVL----- | ET         | KEIAAYRDAH  | -----       | ---YPFVLEAS   |
| 84 | K-----ADV  | IMCDNMSIE----- | EI         | KEVVAYRAN   | -----       | ---APYICIEAS  |
| 85 | G-----ADI  | VMCDNMSLH----- | DI         | EECVKYRARF  | -----       | ---APGVKLEVS  |
| 86 | G-----ADI  | VMCDNMTPS----- | QV         | QETVKYRDAN  | -----       | ---FSHVLEAS   |
| 87 | S-----ADI  | IMLDNFSLH----- | QL         | KEAVQQVNKK  | -----       | ---CKLEAS     |
| 88 | G-----IDM  | IMFDNMSLE----- | MM         | REAVKIVS--  | -----       | ---QKVFIEAS   |

|     |            |             |          |             |            |             |
|-----|------------|-------------|----------|-------------|------------|-------------|
| 89  | G-----ADI  | IMLDNMDLD-  | -----AM  | RRAVGLIAG-  | -----      | ---RALVEAS  |
| 90  | G-----ADI  | IMLDNMDLP-  | -----TM  | TEAVALIGG-  | -----      | ---RALVEAS  |
| 91  | G-----ADV  | IMLDNMDLE-  | -----TL  | AEAVALVDG-  | -----      | ---NAVTEAS  |
| 92  | G-----ADV  | IMLDNMTLD-  | -----DM  | RAAVSLVSG-  | -----      | ---RVPLEAS  |
| 93  | HV-----DR  | IMLDNMTF-   | -----EAM | RAALGIIPR-  | -----      | ---TIETETS  |
| 94  | NV-----DR  | IMLDNMDA--  | -----DGL | AALPLIPD-   | -----      | ---HIETEAS  |
| 95  | KA-----HR  | ILLDNMDN--  | -----DTL | KKALEIIPA-  | -----      | ---EVETEAS  |
| 96  | G-----ADI  | IMLDNMSLA-  | -----DM  | KTAVAMIDG-  | -----      | ---RALVEAS  |
| 97  | G-----ADL  | VLLDNMDD--  | -----AA  | MAEAVR---R  | A-----     | -AGRVLLEAS  |
| 98  | G-----ADV  | VMLDNMDD--  | -----AQ  | IREAVKLA--  | -----      | -AGRPLEVS   |
| 99  | G-----VDI  | IMLDNMSVP-  | -----DM  | REAVLHVNGR  | -----      | ---IPLEAS   |
| 100 | G-----ADI  | ILLDNFTL--  | -----DL  | LQRAVAIN--  | -----      | -AGRALLEAS  |
| 101 | S-----VNL  | IMLDNMGVS-  | -----DI  | KDSIKMIE--  | -----      | ---NSAMVEVS |
| 102 | N-----VDT  | VMLDNMSLD-  | -----NI  | KKSVSIVN--  | -----      | ---SRAKIEVS |
| 103 | N-----VNM  | ILLDNMSIT-  | -----EI  | EQAVSIVN--  | -----      | ---GKSILEAS |
| 104 | N-----VDM  | ILLDNMSIG-  | -----EI  | KQAVEIVN--  | -----      | ---GKSVLEVS |
| 105 | D-----VDS  | VLLDNMSVR-  | -----EI  | IDCVTYIRNA  | S-----     | ---SRVKIDAS |
| 106 | K-----FNT  | VLFDNMNNK-  | -----TL  | KAGVKMAK--  | -----      | ---KHYTEAS  |
| 107 | SG-----VAR | VLCDFNSIS-  | -----DL  | IQAVGLAKGK  | -----      | ---LPLEAS   |
| 108 | G-----VDA  | VLLDNMSVE-  | -----DL  | AQAVAMVGG-  | -----      | ---RAITEAS  |
| 109 | T-----PDA  | VLLDNMSVD-  | -----DL  | RQAVAMVAG-  | -----      | ---RAITEAS  |
| 110 | A-----PDA  | VLLDNMSLD-  | -----EL  | RHAVSMVAG-  | -----      | ---RCITEAS  |
| 111 | K-----VDA  | VLLDNMSPE-  | -----QL  | ARAVELTAG-  | -----      | ---RAITEAS  |
| 112 | S-----PDV  | VLLDNMGPE-  | -----LL  | SEAVAINAAH  | WGLSVASYPG | DLRRTRLEAS  |
| 113 | G-----VDA  | VLLDNMTPE-  | -----QL  | REAVEIVAG-  | -----      | ---RAITEAS  |
| 114 | G-----VDA  | VLLDNMTPD-  | -----QL  | REAVIVAG-   | -----      | ---RAITEAS  |
| 115 | GM-----ADA | VLLDNMDLA-  | -----TL  | REAVRMSEG-  | -----      | ---RLKLEAS  |
| 116 | NL-----ADV | VLLDNMDLD-  | -----TL  | KKAVAMSAG-  | -----      | ---RVVLEAS  |
| 117 | GL-----ADV | VLLDNMDIA-  | -----TL  | QEAVRLADG-  | -----      | ---RVVLEVS  |
| 118 | G-----FDV  | VQLEKFAPA-  | -----DV  | ATLAQRLATG  | -----      | -PHRPVIAAA  |
| 119 | G-----FDV  | VQLEKFTPA-  | -----DV  | AALTQQLTED  | -----      | -RRRPVVAVA  |
| 120 | GM-----ADA | VLLDNMDIA-  | -----TL  | KEAVKMADG-  | -----      | ---RVALEAS  |
| 121 | G-----IDA  | VLLDNMSPD-  | -----ML  | REAVAMVAG-  | -----      | ---RAVTEAS  |
| 122 | GG-----ADA | VLLDNMDTE-  | -----TL  | ARAVRMAKG-  | -----      | ---RLITEAS  |
| 123 | GG-----ASV | VLLDNMTPA-  | -----EL  | REAVEINAG-  | -----      | ---RLALEAS  |
| 124 | G-----ADV  | IQLEKFPE-   | -----AV  | AEAVRALE--  | -----      | -GRPVRIAAA  |
| 125 | G-----VDV  | IMLDNMSND-  | -----DM  | RKAVKIVDK-  | -----      | ---RIPLECS  |
| 126 | GG-----ADV | VLLDNMQTA-  | -----EL  | REAVAMTAG-  | -----      | ---RVVLEAS  |
| 127 | G-----AES  | VLLDNFPLD-  | -----DL  | RAAVASAKG-  | -----      | ---KVTLEAS  |
| 128 | G-----PHA  | ILLDNMSLE-  | -----QL  | REAVTITGG-  | -----      | ---RVPLEAS  |
| 129 | G-----ATH  | LLLDNMNPE-  | -----TL  | EKAVSLVQG-  | -----      | ---RIPESS   |
| 130 | G-----ATR  | LLLDNMGPD-  | -----LL  | RQAVALVAG-  | -----      | ---RVPCEAS  |
| 131 | G-----ATH  | LLLDNMGGLD- | -----DL  | RTSVAIVDG-  | -----      | ---RVPTEAS  |
| 132 | G-----ATR  | LLLDNMGPD-  | -----TL  | REAVSIVAG-  | -----      | ---RVPTEAS  |
| 133 | D-----IDA  | VLLDNMDPA-  | -----TL  | RQAVGIING-  | -----      | ---RAIAEAS  |
| 134 | GG-----AEV | VLLDNMDAP-  | -----TL  | TRAVDMVAG-  | -----      | ---RLVTEAS  |
| 135 | G-----ADV  | IQLEKFTPA-  | -----ET  | AETVGRMG--  | -----      | -HYGILVAAA  |
| 136 | G-----ADI  | VLLDNMGPD-  | -----VL  | RRAVAIVAG-  | -----      | ---RAKTEAS  |
| 137 | G-----AHI  | LLLDNMTLE-  | -----QM  | REAVKINAG-  | -----      | ---RTMLEAS  |
| 138 | G-----AES  | VLLDNMTAE-  | -----DV  | RTAVERVKKL  | -----      | -DRSVPLEAS  |
| 139 | G-----ATH  | LLLDNLTPA-  | -----EA  | VEWIAEIAGR  | A-----     | -K---VELS   |
| 140 | G-----ADV  | IMFDNCPPD-  | -----TV  | RHFAKLTPAN  | -----      | ---IKTEAS   |
| 141 | G-----VDI  | IMFDNMPPH-  | -----II  | KEYVALVPDG  | -----      | ---IVTEAS   |
| 142 | G-----ADI  | IMFDNRTPD-  | -----EI  | REFSKI VPSA | -----      | ---IVTEAS   |
| 143 | G-----ADI  | IMFDNCPPE-  | -----TV  | KAF AEMTPAG | -----      | ---IITEAS   |
| 144 | Q-----ADV  | IMFDNATPE-  | -----AI  | RTYLAYVPAG  | -----      | ---IKTEAS   |
| 145 | G-----VDV  | IMFDNRTPD-  | -----EV  | RAFVRLVPKP  | -----      | ---IITEAS   |
| 146 | G-----ADI  | IMFDNRTPE-  | -----EI  | KQLVKLVPPH  | -----      | ---ITTEIS   |
| 147 | G-----ADI  | IMLDNMSLE-  | -----QI  | EQAITLIAGR  | -----      | ---SRIECS   |
| 148 | K-----ADI  | IMLDNMDVE-  | -----TI  | KKAVKLINKR  | -----      | ---ALIEVS   |
| 149 | K-----ADI  | IMLDNMDIK-  | -----TL  | KEAVKLIDNR  | -----      | ---AEVEAS   |
| 150 | K-----ADI  | IMLDNMDID-  | -----AM  | KKAVKMINGK  | -----      | ---AIVEAS   |
| 151 | K-----ADI  | IMLDNMSLD-  | -----EM  | KKAVKIIDGR  | -----      | ---AVTEAS   |
| 152 | G-----ADI  | VMLDNMSPO-  | -----RV  | KEARKIAGDK  | -----      | ---VLEAS    |
| 153 | R-----ADI  | ILLDNMDSE-  | -----SM  | RKAVEIVNGQ  | -----      | ---ALLEAS   |
| 154 | G-----VDT  | IMLDNFTID-  | -----QL  | IEGVDLIGG-  | -----      | ---RALVEAS  |
| 155 | G-----VDT  | IMLDNFTNE-  | -----EL  | REGIKMVAG-  | -----      | ---RAIVEAS  |
| 156 | GVR-----L  | ILLDNMSVD-  | -----QV  | KIAVDMCR--  | -----K     | APHPVEIEAS  |
| 157 | GKAR---PPQ | VLLDNFTVE-  | -----DT  | RKAVELRD--  | -----Q     | LAPQVLESS   |
| 158 | DVE-----L  | VLLDNFPLW-  | -----QT  | QAAVQRRN--  | -----A     | TAPTCKLESS  |
| 159 | NVE-----L  | VLLDNFPLW-  | -----QT  | QIAVQRRD--  | -----A     | NAPGCKLESS  |
| 160 | GAD-----L  | ILLDNFTPT-  | -----EC  | EEAVAVIN--  | -----      | ---GRALLEAS |
| 161 | G-----VDT  | IMLDNFTLE-  | -----QL  | REGVAIVDG-  | -----      | ---RAIVEAS  |
| 162 | G-----VDT  | IMLDNFTLE-  | -----EL  | AAGVALVDG-  | -----      | ---RARVEAS  |
| 163 | G-----VDT  | IMLDNFSLE-  | -----EL  | RAGVKQVDG-  | -----      | ---RAIVEAS  |
| 164 | GCT-----E  | ILLDNMDTA-  | -----TM  | AEAVRLTA--  | -----G     | RAT---LEAS  |
| 165 | GAE-----E  | ILLDNFTVP-  | -----EL  | REAVALVA--  | -----      | ---GRARLEAS |
| 166 | GCD-----L  | ILCDNMSLA-  | -----DL  | RAAVQLAR--  | -----      | PAG--VRLEAS |
| 167 | GAD-----L  | ILCDNMTPR-  | -----DL  | RASVALAR--  | -----      | PAG--VRLEAS |
| 168 | GAQ-----L  | VLLDNMPPA-  | -----MV  | RQAVAMVRDL  | -----G     | AAGRCRLEVS  |
| 169 | G-----ADT  | IMLDNFSLD-  | -----DT  | RRGVELIDG-  | -----      | ---KAIVEAS  |
| 170 | G-----ADA  | VLLDNMSP--  | -----EE  | VRRCVRVARR  | E-----     | -RPGVVVEVS  |
| 171 | G-----ADI  | IMLDNMDIE-  | -----TT  | KKAIKIINKK  | -----      | ---AIECS    |

|     |            |             |          |             |            |             |
|-----|------------|-------------|----------|-------------|------------|-------------|
| 172 | GID-----I  | VLLDNFSLD-  | -----DL  | RRAVARRD--  | -----E     | LGVTLDEAS   |
| 173 | G-----AEV  | ILLDNFSLE-  | -----DS  | KTAYSILKQK  | AP-----    | ---NVLIEFS  |
| 174 | Q-----VEI  | IMLDNMGTD-  | -----TM  | ATAVKLIRQA  | -----      | -NPLIRIEAS  |
| 175 | G-----ANG  | VLLDEFSPK-  | -----QL  | TQLVPRLR--  | -----AS    | STGVVLEAS   |
| 176 | G-----VGW  | IMLDNMNLA-  | -----QV  | QAAVQVIRDR  | -----      | -APRTKIEVS  |
| 177 | G-----ADG  | VLLDEFSPK-  | -----QL  | QALVPRLR--  | -----QL    | APGGVLEAS   |
| 178 | G-----ADA  | LLLDEFSPQ-  | -----AL  | TTLVPMRAQ   | ---AEA--RP | ARASIVLEAS  |
| 179 | G-----ADL  | ILLDNFPLE-  | -----QI  | RAAVQRVGGK  | -----      | ---VPLEAS   |
| 180 | G-----ADL  | ILLDNFTLE-  | -----ET  | QAAVQRVGGR  | -----      | ---VPLEAS   |
| 181 | G-----VDV  | IMLDNMPIP-  | -----EM  | TQAVAMIRAE  | -----      | -APHIKIEAS  |
| 182 | G-----VQV  | IMLDNMPVE-  | -----RM  | REAVQLIAG-  | -----      | ---RVLTEAS  |
| 183 | K-----ADI  | IMLDNMPVD-  | -----LM  | RQAVQLIRQQ  | -----      | -DNGVKIEAS  |
| 184 | G-----ADG  | ILLDEMSPN-  | -----EI  | TNLIPQLREL  | AKQN-----  | -SKELIEAS   |
| 185 | G-----ADS  | ILLDEFNPE-  | -----LL  | KEGIKELRQL  | STNNSI--RT | IRNDLIEVS   |
| 186 | G-----ANG  | VLLDEFSPK-  | -----QL  | QDLVPRLRLL  | ---AE---QR | AEGPVVLEAS  |
| 187 | G-----ADG  | VLLDEMSIQ-  | -----AI  | EKLVPRLRQL  | SKNSKS--KY | VSQNVIEVS   |
| 188 | G-----ADS  | VLLDELSPE-  | -----II  | QKNVQELRDL  | SMNSLK--KE | VNKNLIEVS   |
| 189 | G-----ADS  | ILLDEFNPE-  | -----LL  | EKCIKELREL  | SINSSK--RT | KRNNLIEVS   |
| 190 | Q-----ADI  | IMLDNMSVE-  | -----VM  | EQAVKMIRQN  | -----      | -NSRIKIEAS  |
| 191 | GG-----VDR | IMLDNFTF--  | -----ENT | KKAVEMIGG-  | -----      | ---KYETESS  |
| 192 | GA-----DI  | IMLDNMMDN-- | -----DTM | CEAVRLIAG-  | -----      | ---RARTEAS  |
| 193 | A-----PDF  | ILLDNMPPE-  | -----TL  | RQAVART---  | -----      | -DGRVPLEAS  |
| 194 | GG-----AFR | IMLDNMSP--  | -----ALM | KEAVALING-  | -----      | ---NAEVEAS  |
| 195 | DG-----IYR | ILLDNFN--   | -----EET | RQAVDLING-  | -----      | ---KCFTESS  |
| 196 | R-----PDM  | ILLDNFMVD-  | -----DL  | AEAVRWIKAN  | G-----     | -FGNILLEAS  |
| 197 | A-----PDR  | ILLDNFTCA-  | -----QL  | CEAVQLVRES  | -----      | -GSKVELEAS  |
| 198 | G-----ADV  | VQVDMKMPSE- | -----EL  | AILVAGIHRQ  | -----      | -FPGVKVSAA  |
| 199 | K-----PDI  | VLLDNFGID-  | -----LL  | SDAVAFSKEN  | -----      | -YPMVILEAS  |
| 200 | R-----PDI  | ILLDNFTID-  | -----LM  | HEAVEYVRSM  | -----      | -PSGVLEAS   |
| 201 | GP-----SS  | ILLDNMSV--  | -----EDM | KKAVDI IPE- | -----      | ---TIKIEAS  |
| 202 | G-----VDR  | VLLDNMSD--  | -----DL  | LAEAVRVRDR  | L-----     | -APHTLEAS   |
| 203 | G-----ADL  | ILLDNFPLE-  | -----AL  | REAVRRVGGR  | -----      | ---VPLEAS   |
| 204 | G-----VDV  | IMLDNFTPE-  | -----EV  | KRAVEI IKG- | -----      | ---RALVEVS  |
| 205 | G-----ADI  | VMLDNLSPE-  | -----EV  | KDISRRIKDI  | NPNVI----- | ---VEVS     |
| 206 | K-----PDI  | ILLDNFEFK-  | -----NI  | ETALNIVSEF  | EKKTG----- | ---FKPKIELS |
| 207 | G-----ADI  | VMLDNMQPE-  | -----VI  | RETLALLEEK  | G-----     | LRKSVLVEAS  |
| 208 | -----SDI   | MLLDHISPE-  | -----EL  | RELGPPELKKL | -----      | -NPKLELAVG  |
| 209 | G-----ADI  | IMLDNMQPE-  | -----AI  | QKTLKTLGSK  | G-----     | LRNSVIVEAS  |
| 210 | G-----ADI  | IMLDNMQPD-  | -----GV  | KETISILNGK  | G-----     | LRESVLEAS   |
| 211 | -----ADI   | LLLDHYTPE-  | -----EL  | KEVAPKLRQI  | -----      | -NPKLELAVG  |
| 212 | G-----VDI  | IMFDNMSPG-  | -----QV  | IKVVEALKNE  | D-----     | LRNSAILEVS  |
| 213 | G-----ADI  | IMFDNMNPE-  | -----EI  | KRGVAMLEEM  | G-----     | VRSGVILEAS  |
| 214 | G-----ADI  | ILLDNMTPE-  | -----QV  | SQVISLISEN  | G-----     | LREKVLIEVS  |
| 215 | G-----ADI  | ILLDNMAPD-  | -----AV  | RETVGTLAAR  | G-----     | LREQVTLEVS  |
| 216 | G-----ADI  | VMLDNMNPD-  | -----EI  | EEVLVTLKQR  | H-----     | LRDDVIEVS   |
| 217 | G-----ADH  | VLLDNMKPA-  | -----EI  | RRAVNEVRK-  | -----      | VREDVILEAS  |
| 218 | G-----ADI  | VLLDNMTPA-  | -----ET  | ERAVDLLDG-  | -----      | ---AALAEAS  |
| 219 | G-----ADI  | VLLDNMSPA-  | -----ET  | ERAVDLVAAS  | D-----     | A--DALTEAS  |
| 220 | G-----ADI  | VLLDNMSPS-  | -----ET  | ADAAAAPVD-  | -----      | ---GTLTEAS  |
| 221 | G-----ADV  | IMLDNMKPK-  | -----EI  | KEVIEKLRRL  | G-----     | LRDGVKIEVS  |
| 222 | G-----ADI  | IMLDNMKPK-  | -----EI  | VRVIEELKRL  | G-----     | LRENKIEVS   |
| 223 | G-----ADV  | IMLDNMTPK-  | -----EI  | ERVIEELKRL  | G-----     | LREKVKIEIS  |
| 224 | G-----ADV  | VMLDNMKPA-  | -----EI  | AEVIEALKRE  | G-----     | LREKVKIEVS  |
| 225 | G-----ADI  | VMIDNQPPE-  | -----VV  | AEIVGELGRR  | G-----     | LRDRVLEAS   |
| 226 | G-----ADV  | ILLDNMKPY-  | -----EI  | LPIVNEELKS- | -----      | ---KVLLEAS  |
| 227 | G-----ADA  | ILLDNMKPE-  | -----EI  | IPVVNELKG-  | -----      | ---KVIVEAS  |
| 228 | G-----ADI  | IMLDNFSPQ-  | -----EV  | KEVVKMLKG-  | -----      | ---KVLLEAS  |
| 229 | G-----FDI  | IMLDNMTPK-  | -----EV  | ERAAKLLAER  | G-----     | LRGRVILEAS  |
| 230 | G-----FSY  | IQLERMTPE-  | -----EV  | AEAAARVRSV  | -----      | -NPRVVVGAS  |

: :

|    |            |             |            |            |            |            |
|----|------------|-------------|------------|------------|------------|------------|
| 1  | GNVTAETLRE | FAETG---VD  | FISVGALTKH | VRALDLSMRF | C-----     | -----      |
| 2  | GNVTDKTLRE | FAETG---VD  | FISVGALTKH | VQALDLSMRF | R-----     | -----      |
| 3  | GGLSLQTAAT | YAETG---VD  | YLAVGALTHS | VRVLDIGLDM | -----      | -----      |
| 4  | GGLSLENAAI | YAGTG---VD  | YLAVGALTHS | VRILDIGLDM | -----      | -----      |
| 5  | GGLSLENAAD | YAATG---VD  | YLAVGALTHS | VRVLDIGLDM | -----      | -----      |
| 6  | GGLSLETAAE | YAGTG---VD  | YLAVGALTHS | VRVLDIGLDV | -----      | -----      |
| 7  | GGLTLDTAAD | YAGTG---VD  | YLAVGALTHS | VRVLDIGLDF | -----      | -----      |
| 8  | GGLALENAAD | YAGTG---VD  | YLAVGALTHS | VRVLDIGLDM | -----      | -----      |
| 9  | GGITLDNLPQ | FCCGPH---ID | VISMGLTQA  | APALDFSLKL | FAKEVAPVPK | IH-----    |
| 10 | GNVTLETLR  | YAETG---ID  | FISVGALTKH | ITALDLSMRF | Q-----     | -----      |
| 11 | GGVTLNLTQ  | FCCGTH---ID | VISLGLTQA  | APALDFSLKL | FAEGDTPVPH | ARRF-----  |
| 12 | GGITLANLPQ | FCCGPH---ID | VLSLGLTQA  | APALDFSLKL | FPEGATPMYN | AHRS-----  |
| 13 | GGVTLTNLHQ | FLGAH---VD  | MVSMGCLTQG | SPSIDFSLKL | SHGLCRRDTD | SSL-----   |
| 14 | GNVTLETVHK | IGQSG---VT  | FISSGALTHS | VKALDISLKI | DTELALQVGR | RTKRA----- |
| 15 | GNVTIDTVKK | IGETG---VT  | YISSGALTHS | VKALDISLKI | DTELALQVGR | RTNRA----- |
| 16 | GGITLETAPR | YMCAA---AD  | IISVS-LSQG | YECVDYSLKV | SFTNREA--- | -----      |
| 17 | GGLNLDNLEE | YLCDD---ID  | IYSTSSIHQG | TPVIDFSLKL | AH-----    | -----      |
| 18 | AGLRIDNLS  | YLCQD---ID  | IYSTSSIHQG | TPVVDVSLKI | DH-----    | -----      |
| 19 | GGLTLQNLSS | YLSND---ID  | IYSTSSIHQG | VSTIDFSLKI | DAK-----   | -----      |
| 20 | GGIIEGSLTG | RVGPD---ID  | ILSTSAVHQS | CPHVDFSLKI | QPRKSS---- | -----      |

|     |             |            |             |             |             |            |
|-----|-------------|------------|-------------|-------------|-------------|------------|
| 21  | GGITSATIOQ  | YAIPT---ID | IISMGNLTQG  | VPHIDISLKI  | QKQ-----    | -----      |
| 22  | GNVTDKTLRE  | FAETG---VD | FISVGALTKH  | VQALDLSMRF  | R-----      | -----      |
| 23  | GNVTLDTLRG  | YAETG---VD | YISVGALTKH  | VQAMDLSMRF  | I-----      | -----      |
| 24  | GNITLDTLRS  | YAETG---ID | FISVGALTKH  | IRALDLSMRF  | N-----      | -----      |
| 25  | GNINKNLLK   | FASTG---VD | YISLGELTKN  | IKSLDLTMNI  | DS-----     | -----      |
| 26  | GNVTLATLRD  | CALTG---VD | YISVGALTKH  | LRALDLSMRF  | H-----      | -----      |
| 27  | GRITPETAIN  | IAASG---VD | LISVGWITHS  | APILDIGLDF  | KSAASSDR--  | -----      |
| 28  | GSVDLAGIRA  | IAQDG---VD | CISIGGLTKH  | VQAVDLSLKL  | GPAPY-----  | -----      |
| 29  | GSVDLAGIRA  | VAEDG---VD | CISIGGLTKH  | VQAVDLSLKL  | GPPPTR----  | -----      |
| 30  | GNITLDNLKE  | CAETG---VD | YISVGALTKH  | LKALDLSMRF  | KS-----     | -----      |
| 31  | GNVTLETIAE  | YAETG---VD | YISVGALTKH  | VKAMDLSMRF  | K-----      | -----      |
| 32  | GGINEGTLRN  | IAETG---VD | YISIGTLTKD  | VRAVDLSMRL  | TL-----     | -----      |
| 33  | GGVNETTLRV  | IAETG---VD | YISIGAMTKD  | VKAVDLSMRL  | SL-----     | -----      |
| 34  | GGINDDTLRV  | IADTG---VD | YISIGAMTKD  | VKAVDLSMRL  | SI-----     | -----      |
| 35  | GGITPETVQA  | VAKTG---VD | FIAMGYLTHS  | TTALDIGLDF  | SA-----     | -----      |
| 36  | GNITLDNLRE  | VASTG---VD | YISMGVLT KD | VTAIDLMSRF  | NA-----     | -----      |
| 37  | GNVTLDTLAD  | FAKTG---VD | YISVGALTKH  | VRALDLSLRL  | K-----      | -----      |
| 38  | GNVTLDTLAT  | FAQTG---VD | YISVGALTKH  | VKALDLSLRL  | KA-----     | -----      |
| 39  | GNVTLDTLGE  | FAKTG---VD | FISVGALTKH  | VRAMDLSLRL  | KH-----     | -----      |
| 40  | GNVTLDTLAE  | FAKTG---VD | YISVGALTKH  | VRALDLSLRL  | KA-----     | -----      |
| 41  | GNVTLDTISD  | YAKTG---ID | YISVGALTKH  | VKALDLSLRL  | KD-----     | -----      |
| 42  | GNITDERLPE  | LAATG---VD | FISSGALTKN  | VQAI DLSMRI | SEDN-----   | -----      |
| 43  | GNMTIEILQK  | YAKAG---VD | YISSGALTKH  | VNAIDLMSRF  | K-----      | -----      |
| 44  | GNMTLQTLKT  | YSQAG---VD | FISSGALTKN  | LQSIDLSMRF  | D-----      | -----      |
| 45  | GNITERITE   | LAQVG---VD | YISSGALTKH  | VQAI DLSLRV | VG-----     | -----      |
| 46  | GNLDLENLKT  | IASLN---ID | FCSFGALTKH  | VSAVDLSLRV  | HS-----     | -----      |
| 47  | GNVNSDTILP  | YAKTG---VD | YISVGALTKH  | VRAIDLMSRF  | IA-----     | -----      |
| 48  | GGINARTLVP  | VAETG---VD | YISIGALTKD  | VRAIDLMSRL  | E-----      | -----      |
| 49  | GNVNLETIHE  | IAKTG---VD | YISVGALTKH  | LRAIDLMSRI  | Y-----      | -----      |
| 50  | GGININNIAD  | IAQTG---VD | FISVGSITKS  | IQAI DLSLLI | RETL-----   | -----      |
| 51  | GSIDLDSIRA  | VAETG---VD | FISVGGTLTKH | LRAIDLMSRI  | ALLG-----   | -----      |
| 52  | GNIDRNSIVA  | IAKTG---VD | FISVGAITKH  | IKAI DLSLQV | QL-----     | -----      |
| 53  | GGITLKNIRQ  | VAETG---VD | YISVGALTKD  | IRAVDLSIRF  | TPEAF-----  | -----      |
| 54  | GNLGEQGLRE  | LAGTG---VD | YISIGAITKH  | VRAVDYSLRL  | RL-----     | -----      |
| 55  | GGLDLDAVRA  | LAATG---VD | RISVGALTKH  | VHALDLSLRL  | TIPSG-----  | -----      |
| 56  | GGVTSETLAA  | IAETG---VD | FISIGGVTKH  | CRAIDLMSRL  | I-----      | -----      |
| 57  | GNVSEATLRE  | IAETG---VD | CISIGALTKD  | VKAIDLMSRV  | VRTETR----- | -----      |
| 58  | GNLTVGNAAE  | LPKSR---HW | FLSSGALTKH  | VRAIDLSLRI  | R-----      | -----      |
| 59  | GNVTLDTLAD  | YAATG---VD | FISVGALTKH  | VRALDLSMRF  | I-----      | -----      |
| 60  | GNITLSNIKN  | YACTG---ID | YISVGALTKN  | VRALDLTMRL  | I-----      | -----      |
| 61  | GGIGDRLKR   | VAQTG---VD | GIALGYLTHS  | SRSLDIGLDF  | VA-----     | -----      |
| 62  | GGVDLDSVRA  | IAATG---VD | RISVGKLT KD | VRALDLSMRF  | TL-----     | -----      |
| 63  | GGVSMATIRA  | FAQTG---VD | RISVGALTKD  | VRATDYSLRV  | VE-----     | -----      |
| 64  | GGVNADTIRT  | FAETG---VD | RISVGALTKD  | VRATDYSLRI  | IG-----     | -----      |
| 65  | GGIRLETIRA  | VAETG---VD | YISTSKITQS  | APAVDIGLDD  | A-----      | -----      |
| 66  | GGVNFDTVRA  | IAETG---VD | RISIGALTKD  | VRATDYSMRI  | VE-----     | -----      |
| 67  | GGVNFDTVRT  | IAETG---VD | RVSIGALTKD  | VRATDYSMRI  | V-----      | -----      |
| 68  | GGVNFDTVRA  | FAETG---VD | RISIGALTKD  | VRATDYSMRI  | VD-----     | -----      |
| 69  | GRITPETAPA  | VAATG---VD | LMAIGWLTHS  | ARVLDIGLDS  | -----       | -----      |
| 70  | GGVNMS TVRA | IASTG---VD | RISIGALTKD  | VKAIDFSMRF  | ASSPL-----  | -----      |
| 71  | GGVTQESLRS  | LAETG---VD | RISIGLTKD   | VKAIDFSMRF  | HEL-----    | -----      |
| 72  | GGVTLAGLRA  | LAETG---VD | RISIGTLTKD  | VQAI DYSMRF | EAPKGAN---  | -----      |
| 73  | GGVTFDNLRA  | CAETG---VD | RISVGALIKD  | ITAVDFSMRF  | QDRPVER---  | -----      |
| 74  | GGVTLEGLRA  | LAETG---VD | RISIGTLTKD  | VKATDFSMRM  | QDPA-----   | -----      |
| 75  | GGVTLEGLRA  | LAETG---VD | RISIGTLTKD  | VKATDFSMRL  | QELA-----   | -----      |
| 76  | GGVALDQVRD  | IAATG---VD | RISIGRLTKD  | VTATDYSMRV  | LGDA-----   | -----      |
| 77  | GNVTLDTVRA  | IAETG---VD | RISIGSLTKD  | IRAVDLSMRF  | YEA VL----- | -----      |
| 78  | GGITLDNVRA  | VARTG---VD | RISIGLTKD   | IKAI DLSMRF | SSRS-----   | -----      |
| 79  | GGVNLERVRA  | IAETG---VD | RISIGSLTKD  | VRALDLSLRH  | VEE-----    | -----      |
| 80  | GNVTLETIRG  | IAETG---VD | RISVGALTKD  | VKALDLSMRF  | VG-----     | -----      |
| 81  | GNITLANVRA  | VAETG---VD | RISIGSLTKH  | VRAIDLMSRA  | LARA-----   | -----      |
| 82  | GGIDHNVRE   | IALTG---VD | RISIGSLTKH  | LQAI DLSMRF | QPQE-----   | -----      |
| 83  | GNISLESINA  | YAKSG---VD | AISVGALIHQ  | ATFIDMHMKM  | A-----      | -----      |
| 84  | GNINLKNIVQ  | YASSG---VD | AISVGS LIHQ | AQWL DLSLKI | EG-----     | -----      |
| 85  | GNITENLLV   | YARLG---VD | AISSGSLIHQ  | ARWLDMSLKM  | R-----      | -----      |
| 86  | GNISLQTIEN  | YAKVG---VD | AISSGSLIHQ  | ANWIDLMSKV  | D-----      | -----      |
| 87  | GNVELPHLSE  | LAETG---VD | YISTGAITKN  | VQAI DFSMRF | TLEDTQ----- | -----      |
| 88  | GNMSLDKIKK  | LADCG---VD | AISFGELTHS  | VKAFDFSLKK  | ELI-----    | -----      |
| 89  | GGVNLETVRG  | IAETG---VD | IISVGALTHS  | ARAMDISMLL  | EAE-----    | -----      |
| 90  | GGVNLETVRG  | IAEAG---VD | IISVGALTHS  | ARAMDISMLL  | EAE-----    | -----      |
| 91  | GGVTLETVRG  | IAETG---VD | LISVGALTHS  | SPAVDISMLF  | Q-----      | -----      |
| 92  | GGVSLDTVRA  | IAETG---VD | IISVGALTHS  | ARAMDISMLL  | E-----      | -----      |
| 93  | GGVTLETIRS  | LALVGDRGPD | FISVGR LTHS | APAADF SMRI | SKEHP-----  | -----      |
| 94  | GGVTLETIRV  | LAQASSRRLD | FISVGR LTHS | APSADF SMRI | SE-----     | -----      |
| 95  | GNMNLDRVAS  | VAALG---VN | YISVGALTHS  | APCADVSLVF  | QWED-----   | -----      |
| 96  | GGVTLKTVD   | IATTG---VD | IISSGALTHS  | VISCDIGMDW  | SMENL-----  | -----      |
| 97  | GNMTLERLPR  | VAATG---VD | FVSMGAVTHS  | ARAVDLAFDL  | A-----      | -----      |
| 98  | GGVTLDRLPR  | LAKLG---ID | FVSMGALTHS  | ARAMDLSLEI  | TAAAKRPARS  | KQPKPA---- |
| 99  | GNVTLATVRQ  | IAETG---VD | FISVGALTHS  | VKAADLSLLV  | MNRE-----   | -----      |
| 100 | GGVTLERVRV  | IAETG---VD | FVSCGALTHS  | APAVDITMEY  | SS-----     | -----      |
| 101 | GGVNIENIRE  | IASLG---AD | YISIGSITNS  | F7CKDISLEV  | FK-----     | -----      |
| 102 | GGINLNNVRP  | IAECG---VD | YISVGCITNA  | VKCKDIGL DV | IEQI-----   | -----      |
| 103 | GCIDIRNVRS  | IAMTG---VD | YISIGCITHS  | FKNKDIGLDI  | VHNV-----   | -----      |

|     |             |            |             |             |             |            |
|-----|-------------|------------|-------------|-------------|-------------|------------|
| 104 | GCVNIRNVRS  | IALTG---VD | YISIGCITNS  | FKNKDIGLDI  | EY-----     | -----      |
| 105 | GGITLATVKE  | IAETG---VD | FISVGMGLTHS | IVSADIGIDV  | RTKL-----   | -----      |
| 106 | GNVNLKSICK  | IAATG---VD | RVSIGSITHS  | VPAIDFKFEI  | -----       | -----      |
| 107 | GNINENNIVE  | VANTG---VD | FISTGSITKN  | IQAIDLSLRF  | I-----      | -----      |
| 108 | GRVTRASAPA  | IAATG---VD | LISVGLWTHS  | APILDIGLDM  | PADRNCNRHL  | N-----     |
| 109 | GRITAAATAPA | IAATR---VD | LISIGWLTHS  | APILDIGLDF  | RASLSPASKP  | A-----     |
| 110 | GRITSTVPA   | VAATG---VD | LISIGWLTHS  | APILDIGLDY  | RDT-----    | -----      |
| 111 | GRVTRETAPA  | IAASG---VD | LISVGLWTHS  | APVLDIGLDY  | RA-----     | -----      |
| 112 | GNVQIETIRA  | IAETG---VD | YISTSKITMA  | APTLDIGLDV  | SI-----     | -----      |
| 113 | GRINPQTAAA  | IAATG---VD | LISIGWTHS   | APVLDIGLDF  | ESQS-----   | -----      |
| 114 | GRVTPATAAA  | IAASG---VD | LISVGLWTHS  | APVLDIGLDF  | VEAAGAA---  | -----      |
| 115 | GGVTLDSIAA  | IAATG---VD | YASSGALTHS  | APNFDICALDI | EA-----     | -----      |
| 116 | GGVTRESISR  | IAATG---VD | YASSGALTHS  | APNFDVALDI  | DA-----     | -----      |
| 117 | GGVTQDTVAA  | IAATG---VD | YASAGALTHS  | APNFDVALDI  | DA-----     | -----      |
| 118 | GGVNASNAAA  | YAQAG----A | QVLVTSSPYM  | AKPRDVQVKI  | RREQQTN---  | -----      |
| 119 | GGVNAGNAAA  | YAGAG----A | DVLVTSAPYL  | AKPRDVQVHI  | LPDPR-----  | -----      |
| 120 | GGVTEATIAA  | IASTG---VD | YASSGALTHS  | APNFDVALDI  | DA-----     | -----      |
| 121 | GRITPATAPS  | VAATG---VD | LISIGWLTHS  | VGILDIGLDF  | KDQAAA----- | -----      |
| 122 | GNVTLDTVAA  | IAATG---VD | YISSGALTHS  | YRTVDLGLDF  | -----       | -----      |
| 123 | GNVKRDTVAE  | IAATG---VD | FISSGALTHS  | ARTVDLGLDF  | -----       | -----      |
| 124 | GGIHPGNAAA  | YAAAG----A | QVLVTSAPYQ  | APPRDVAVTL  | EPA-----    | -----      |
| 125 | GGVRLDTIRA  | KAETG---VD | FVSVGRITQS  | ATCVDIGLDD  | L-----      | -----      |
| 126 | GNMRLARVAE  | VAATG---VD | YISVGALTHS  | ARTLDLGLDF  | -----       | -----      |
| 127 | GGVNLDTVRG  | IAETG---VD | VISVGALTHS  | APNFDIGLDE  | N-----      | -----      |
| 128 | GGVTLTSVAA  | IAETG---VD | FISSGALTHS  | APNLDLGLDV  | V-----      | -----      |
| 129 | GGVNLDNIRS  | RAETG---VT | YISVGRLTQS  | APAVDIGLDF  | SLLPSA----- | -----      |
| 130 | GGVRLDTIGA  | IAASG---VD | YVSVGRLTQS  | APAADIGLDF  | TPLG-----   | -----      |
| 131 | GGVRLDTIRA  | IAETG---VT | YVSVGRLTQS  | APAADIGLDF  | ALA-----    | -----      |
| 132 | GGITLDTIKA  | KAATG---VD | YVSVGRLTQS  | APAADIGLDF  | TPL-----    | -----      |
| 133 | GRITPQTAPA  | IAESG---VD | LISAGWLTHS  | SAVLDIGLDF  | LD-----     | -----      |
| 134 | GGVSLDTIAA  | LAESG---VD | YISVGALTHS  | VTTLDIGLDI  | VVAPPKAERA  | -----      |
| 135 | GGINATNAAA  | YAQAG----A | AVLVTSAPYC  | AQPVDVKVAI  | TRQ-----    | -----      |
| 136 | GGVTLDTIRA  | IAETG---VD | FVSVGRITQS  | APAVDIGLDW  | S-----      | -----      |
| 137 | GNVTLDTVRD  | IAETG---VD | MISSGALTHS  | AGNKDVSLLV  | RF-----     | -----      |
| 138 | GGIVLENVRS  | YAETG---VN | FISVGALTHS  | ARAVDLSLRI  | MPA-----    | -----      |
| 139 | GGITLDNVRA  | YAGTG---AD | FVSSGAIHNS  | ARAVDISFRL  | ELI-----    | -----      |
| 140 | GGITLESPLA  | FKGTG---VN | YISLGLFTHS  | VKSLDISMD-  | -VTLNESVE   | ECCYVNS--- |
| 141 | GGISLQTIAS  | YRGC---VD  | YLSLGFITHS  | APILDFTLLI  | DEEGEQ----- | -----      |
| 142 | GGITIEDLSK  | YGKTG---VD | YISLGLTHS   | VKALDISFN-  | ---IEA----- | -----      |
| 143 | GGISFENLPA  | YRGTG---VH | CISLGLYTHS  | AKSLDISMN-  | -VDLKK---   | -----      |
| 144 | GGITMANLRQ  | FANTG---VD | FLSLGFLTHS  | VVALDLSMLI  | QKGEQCK--   | -----      |
| 145 | GGITLANVAA  | YGATG---VD | YISLGLCLTHS | APALDMSFN-  | ---LR-----  | -----      |
| 146 | GNVTLNIHR   | YKGS---AN  | YISLGLSLTHS | VRAFDISFNS  | KGGIKA----- | -----      |
| 147 | GNIDMTTISR  | FRGLA---ID | YVSSGSLTHS  | AKSLDFSMKG  | LTYLDV----- | -----      |
| 148 | GNITFENIRE  | KAVPG---VD | YISSGMLTHS  | FNVLDISMKN  | LRNEK-----  | -----      |
| 149 | GNVTLDNIRE  | IAETG---VD | FISTGAVTHS  | FKVLDISMKN  | FRYID-----  | -----      |
| 150 | GNVNLKTIRD  | IANTG---VD | YISCGIITHS  | AKALDISMKN  | LVLMDK---   | -----      |
| 151 | GNVNADTIYD  | IACGT---VD | IISVGGLTHS  | VKAFDISMKF  | S-----      | -----      |
| 152 | GGINEENILE  | YARAG---ID | VISLGLTLTHS | VKALDISLDL  | KSLKETGQ--  | -----      |
| 153 | GGVNEENIVE  | IAKTG---VD | FISCGALTHS  | APSLDISFKI  | L-----      | -----      |
| 154 | GGVNLNTAGK  | IASTG---VD | VISVGALTHS  | VHALDLGLDI  | F-----      | -----      |
| 155 | GGVNLDTVAD  | IARTG---VD | VISVGALTHS  | VRALDLGLDF  | E-----      | -----      |
| 156 | GGLTLDVALS  | YAQTG---VN | YLAVGELTHS  | VRALDIGCDV  | N-----      | -----      |
| 157 | GGLTLDVAGD  | YAAAG---VE | SVAVGGLTHS  | VRALDIGLD-  | -----       | -----      |
| 158 | GGLTLDVAAAD | YARTG---VD | YLAVGALTHS  | VTVLDLGLDF  | -----       | -----      |
| 159 | GGLTLDVAAE  | YAGTG---VD | YLAVGALTHS  | VTVLDLGLDM  | -----       | -----      |
| 160 | GRTLGNAEA   | YAKTG---VD | FLAVGALTHS  | SPILDIGLD-  | ---LRAAE-   | -----      |
| 161 | GTVSLSTVRA  | IAETG---VD | IISAGALTHS  | VRSIDLGLDV  | VVETP-----  | -----      |
| 162 | GNVSLGTVAE  | IAATG---VD | VISIGGLTHS  | VIALDLGLDV  | ELTVG-----  | -----      |
| 163 | GNVNINTVTE  | IASAG---VD | VISVGGGLTHS | VSALDLGLDI  | ELKPTQN---  | -----      |
| 164 | GGLTIERARE  | VAETG---VD | FISVGALTHS  | VQVFDLGLDL  | SSGSEG----- | -----      |
| 165 | GGLTLDRAAD  | VAATG---VD | YLAVGALTHS  | SPALDIALD-  | ---LRENF-   | -----      |
| 166 | GGLTLRTAAA  | VAAVG---VD | YLAVGALTHS  | APALDLGLDL  | ALDPDHRPGS  | ATAGPPIEDL |
| 167 | GGLSLRVAAD  | VAATG---VD | YLAVGALTHS  | APALDLGLD-  | -LDPGRPSGP  | DCAGPSSAGP |
| 168 | GGLTLAQARA  | VAETG---VQ | YLAVGSITHS  | APVLDVGLD-  | ---FRAVGS   | ---GPPAVG- |
| 169 | GNMSLERVPA  | VAATG---VD | VISVGALTHS  | VRSIDLGLDW  | N-----      | -----      |
| 170 | GGVDLGTVRA  | YAEAG---AD | LVSVGALTHS  | APAADISLEV  | EPC-----    | -----      |
| 171 | GNIDITNINR  | FKGLE---ID | YVSSGAIHNS  | AKILDLSLKN  | LRVDD-----  | -----      |
| 172 | GNVTIDTIGN  | VAATG---VD | RISSGALTHQ  | ATWLDLGMW   | LDGFAS----  | -----      |
| 173 | GGITPEKLEA  | LSEFSG---A | GVSMGYLTH   | TRFLDLGLDI  | ERH-----    | -----      |
| 174 | GNVTLANLTA  | IASTG---VD | FISSAPITR   | SPWLDLSMQI  | VRN-----    | -----      |
| 175 | G-VQPEQLQA  | YAATG---ID | LISTSAPVTR  | SRWLDLSMRF  | T-----      | -----      |
| 176 | SNISLENIRA  | IAETG---VD | YISSAPITR   | SPWLDISMRL  | Q-----      | -----      |
| 177 | G-VQPEQLSA  | YATTG---ID | LISTSAPMTR  | SRWLDLSMRF  | S-----      | -----      |
| 178 | G-VNPADLKL  | YATTG---VD | LISTSAPMTR  | SSWLDLSMRF  | TPPG-----   | -----      |
| 179 | GNMNLERARK  | AAEAG---VD | YISVGALTHS  | AKALDLSLLV  | VRP-----    | -----      |
| 180 | GNMTPERARQ  | VAEAG---VN | YVSVGALTHS  | AKALDLSLLV  | V-----      | -----      |
| 181 | GNITLETLRP  | VALTG---VD | YISTSAMITR  | SPWLDLSLTI  | L-----      | -----      |
| 182 | GNITLDTLGD  | VAATG---VD | YISTSATITR  | APWLDLISLDL | RRVPTDTLP   | LD-----    |
| 183 | GNVTLETIRA  | VAETG---VD | YISSAPITQ   | SKWLDLSMKI  | E-----      | -----      |
| 184 | G-IDPNKILD  | FASTG---VD | IISTSSPITQ  | STWIDFSMRF  | NKQEVN----  | -----      |
| 185 | G-INPINISN  | YLIDG---ID | LISTSSSITK  | SNWIDFSMRY  | IN-----     | -----      |
| 186 | G-VDPGQLHA  | YAATG---ID | LISTSAPVTR  | SPWLDISMRF  | ESTAV-----  | -----      |



|     |             |            |             |             |            |       |
|-----|-------------|------------|-------------|-------------|------------|-------|
| 187 | G-INPNVSD   | YIFTG---ID | LISTSAPITK  | SKWIDFSMRF  | D-----     | ----- |
| 188 | G-INPKEISK  | YLIKG---ID | LISTSSSITK  | SNWIDLSMRY  | IN-----    | ----- |
| 189 | G-INPRDISN  | YLIDG---VD | FISTSSSITK  | SNWIDFSMRY  | IN-----    | ----- |
| 190 | GNITLETIRN  | VAETG---VD | YISTSAPITR  | STWLDLSMKI  | TKAVS----- | ----- |
| 191 | GGITFDTLRD  | YAECG---VD | FISVGALTHS  | VKGLDMSFKA  | C-----     | ----- |
| 192 | GNMTLERLQS  | VAETG---VD | YISVGALTHS  | VTAMDISMNF  | LLTQ-----  | ----- |
| 193 | GGVTLDTVPT  | IAETG---VD | AISVGALTHS  | PETLDLSMRI  | H-----     | ----- |
| 194 | GGINESTIVA  | VAESG---VD | YISVGSLSHS  | YKSKDMSLKA  | F-----     | ----- |
| 195 | GGITLETAKN  | YAECG---VD | FISSGALTHS  | VYNLDLSLKA  | V-----     | ----- |
| 196 | GNIGLHNVSE  | VAMTG---VD | FISIGELTHS  | VKALDMSMKI  | ERA-----   | ----- |
| 197 | GNIGMHNVOQ  | VAESG---VD | FISLGELTHS  | VRALDLSMTI  | QLA-----   | ----- |
| 198 | GGINADNAAI  | YASTG----V | DILVLSSVYF  | GKPSDIAALI  | NP-----    | ----- |
| 199 | GNVGLHNVAQ  | IAETG---VD | YISIGELTHS  | VKALDLSMTI  | SLD-----   | ----- |
| 200 | GNMSLYNVKA  | VAETG---VD | FISVGELTHS  | VRALDLSMTI  | TLG-----   | ----- |
| 201 | GNINLNDNIRE | VAMTG---VD | VISVGALTHS  | APSLDFSLEF  | PVQQETE--- | ----- |
| 202 | GNMTLERLPR  | VAASG---VD | FVSVGALTHS  | APALDISLNL  | ILEN-----  | ----- |
| 203 | GNMTLERAKA  | AAEAG---VD | YVSVGALTHS  | AKALDLSLLV  | VRP-----   | ----- |
| 204 | GNITLNDVLD  | YAVEG---VD | FISSGAIVHS  | SRWLDISLKF  | L-----     | ----- |
| 205 | GGITEENVSL  | YDFET---VD | VISSRRLTQ   | EVFVDSLSEI  | QR-----    | ----- |
| 206 | GGINENNVEN  | YAKYN---VD | VISMGSLIHS  | ATSVDIGLDD  | L-----     | ----- |
| 207 | GGISPANLEG  | YAKTG---VD | VISMGSLIHK  | SRWIDISLEV  | IRSEN----- | ----- |
| 208 | G-IKGPMIPE  | YAPF-----V | DIIVISAPYY  | ANPLDFTTKM  | ERI-----   | ----- |
| 209 | GGISQENLEG  | YAKTG---VD | VISMGSLIHK  | SRWIDMSLEI  | VKQ-----   | ----- |
| 210 | GGISLENLEA  | YAKTG---VD | VISMGLLIHR  | SRWIDVSLEI  | VRPES----- | ----- |
| 211 | G-ISFENIPK  | YAAS-----V | DFVVTAPFY   | AEPFDLTNI   | ERL-----   | ----- |
| 212 | GGIDISNISE  | YAKTG---VD | VISVGSLVHK  | SQWIDVSLEF  | V-----     | ----- |
| 213 | GGINPGNLEA  | YASTG---VD | VISMGALTRG  | ARWMDFSMEV  | RNR-----   | ----- |
| 214 | GGITEDTLAS  | YAALN---ID | RISLGMMLTHT | VINADFSLDI  | MKES-----  | ----- |
| 215 | GGVAGDLAG   | YAAAG---ID | IISMGALHT   | VRNFDVSLDI  | LKGAGTVRLS | ----- |
| 216 | GGITPATITK  | YATLD---VD | VISSGFITNS  | AQTLDLSLNI  | L-----     | ----- |
| 217 | GGITPENAPE  | YAETG---VD | VISLGWLTHS  | APALDLSMRV  | RRMT-----  | ----- |
| 218 | GGITVDDVPA  | YAATG---VD | VISMGALTHS  | APTLDFSFR   | -----      | ----- |
| 219 | GGITVADVPA  | YAETG---VD | IISMGSLLTHS | APTLDFSFR   | G-----     | ----- |
| 220 | GGITLNDVVD  | YAGTG---VD | IISLGSLLTHS | AGALDFSFR   | GGDR-----  | ----- |
| 221 | GGITPENIEE  | YAKLD---VD | VISLGYLTHS  | VRNFDVSLEI  | VKPRVSS--- | ----- |
| 222 | GGITPNIEE   | YAKLD---VD | VISLGYLTHS  | VKNFDVSLEI  | KRGSSS---- | ----- |
| 223 | GGITPENIRE  | YARLD---VD | VISLGYLTHS  | VKNFDVSLEI  | VG-----    | ----- |
| 224 | GGITPENITE  | YAKLD---VD | VISLGYLTHS  | VKNFDVSLEI  | IGRL-----  | ----- |
| 225 | GGIDLSNVAD  | YAATG---VD | IISSSMLTMS  | PVRVDSLRLV  | VEVRELRSA- | ----- |
| 226 | GGITPDNVID  | YAKTG---VD | VISSGYITHS  | YRSLDFSLEDV | EKI-----   | ----- |
| 227 | GGINPDNVIE  | YAKTG---VD | IISSGYITHS  | SRSLDFSLEDV | YKS-----   | ----- |
| 228 | GRITPENVKE  | YAETG---VD | IISSGYLTHS  | VRSLDLSMDV  | EKLT-----  | ----- |
| 229 | GNITEDNIHL  | YAPY-----V | VISVGRLLTHS | APALDMSLEV  | YDDK-----  | ----- |
| 230 | GGIDEHNIAS  | YAPH-----V | DVVVTSAPYR  | APPIDLGTEM  | TPL-----   | ----- |

. : \*
